# Supplementary material for: Imputation of fluid intelligence scores reduces ascertainment bias and increases power for analyses of common and rare variants
Source: medRxiv preprint, doi:10.1101/2025.06.18.25329418, version 1 (2025-06-20)
Supplement: Supplementary Tables [file 329418_file03.xlsx]

## Sheet: Supp. Table 1
Supplementary Table 1. Overview of available FIS measurements.
Overview of available FIS measures in UKB. Datafield 20016 is taken at the assessment centre via touch screen whereas 20191 is an online web-based questionaire.We excluded the data collected at the first repeat imaging visit from our analyses due to the small sample size.
UKB label	Abbreviation	Description	N participants*	N participants (EUR)**
20016-0.0	FIS1	Initial assessment visit (2006-2010)	165341	146526
20016-1.0	FIS2	First repeat assessment visit (2012-2013)	20104	19356
20016-2.0	FIS3	Imaging visit (2014+)	56393	52831
20016-3.0	-	First repeat imaging visit (2019+)	780	740
20191-0.0	FIS4	Online follow-up (2014)	123536	116151
20191-1.0	FIS5	Online follow-up (2021)	180605	169212
*Note that the numbers may be slightly lower than in the UKB Data Showcase, since FIS data are being collected continuously at imaging visits. These numbers correspond to the number of participants available when the data were downloaded on (24-04-2024).
**Defined as individuals that were genetically clustering with European ancestries (See Methods)

## Sheet: Supp. Table 2
Supplementary Table 2. Phenotype and genetic correlations between the different FIS measures
In both tables, the diagonal shows the correlation between raw values and transformed values (in which FIS was regressed on age and age2 then the intercept was added to the residual (see Methods) for each measure. Correlations for raw FIS measures are shown above the diagonal, and below the diagonal are the correlations for transformed FIS values. Standard errors are given in brackets. Note that …
Phenotypic correlations
	FIS1	FIS2	FIS3	FIS4	FIS5
FIS1	0.99 (0.000)	0.65 (0.009)	0.63 (0.005)	0.60 (0.003)	0.56 (0.003)
FIS2	0.65 (0.009)	0.99 (0.000)	0.66 (0.006)	0.60 (0.006)	0.54 (0.006)
FIS3	0.63 (0.005)	0.65 (0.006)	0.99 (0.000)	0.59 (0.004)	0.57 (0.003)
FIS4	0.60 (0.003)	0.60 (0.006)	0.59 (0.004)	0.99 (0.000)	0.56 (0.002)
FIS5	0.56 (0.003)	0.54 (0.006)	0.57 (0.003)	0.54 (0.002)	0.98 (0.000)
Genetic correlations
	FIS1	FIS2	FIS3	FIS4	FIS5
FIS1	1.00 (0.00)	1.08 (0.07)	0.97 (0.02)	0.99 (0.01)	0.97 (0.10)
FIS2	1.08 (0.07)	1.00 (0.00)	1.02 (0.07)	1.08 (0.07)	1.04 (0.06)
FIS3	0.97 (0.02)	1.02 (0.07)	1.00 (0.00)	0.97 (0.03)	0.96 (0.02)
FIS4	0.99 (0.01)	1.08 (0.07)	0.97 (0.03)	1.00 (0.00)	0.97 (0.01)
FIS5	0.97 (0.01)	1.04 (0.06)	0.96 (0.02)	0.97 (0.01)	1.00 (0.00)

## Sheet: Supp. Table 3
Supplementary Table 3. Genetic correlations with 73 traits
Table showing LDSC calculted genetic correlations for Observed FIS1; Integrated GWASs Earliest FIS, Average FIS and all5 FIS; Mega analyzed GWASs MegaFIS-vA, MegaFIS-vB, MegaFIS-earliest, MegaFIS-average, MegaFIS-all5; and intelligence reference GWASs by Savage et al. and the COGENT consortium.
GWAS	Reference	Observed FIS1						Earliest observed FIS						Average observed FIS						MegaFIS-vA						MegaFIS-vB						MegaFIS-earliest						MegaFIS-average						MegaFIS-all5
		rg	se	z	p	gcov_int	gcov_int_se	rg	se	z	p	gcov_int	gcov_int_se	rg	se	z	p	gcov_int	gcov_int_se	rg	se	z	p	gcov_int	gcov_int_se	rg	se	z	p	gcov_int	gcov_int_se	rg	se	z	p	gcov_int	gcov_int_se	rg	se	z	p	gcov_int	gcov_int_se	rg	se	z	p	gcov_int	gcov_int_se
ADHD	Demontis, D. et al. Discovery of the first genome-wide significant risk loci for ADHD. bioRxiv, 145581 (2017).	-0.3902	0.0334	-11.6883	1.4633e-31	-0.0082	0.0087	-0.3882	0.0297	-13.0711	4.8186e-39	-0.0041	0.0092	-0.3968	0.0298	-13.325	1.6568e-40	-0.003	0.0094	-0.4907	0.025	-19.6184	1.077e-85	-0.018617	0.0101	-0.485	0.0257	-18.8894	1.3945e-79	-0.01691	0.01	-0.448	0.0274	-16.3739	2.9373e-60	-0.0088371	0.0097	-0.4527	0.0275	-16.4855	4.6677e-61	-0.0086	0.0097	-0.4504	0.0266	-16.9285	2.775e-64	-0.0119	0.01
ALS	Aude Nicolas*, Kevin P. Kenna*, Alan E. Renton*, Nicola Ticozzi*, Faraz Faghri*, Ruth Chia* et al. (2018) Meta-analysis summary statistics from GWAS of 20,806 ALS cases vs 59,804 controls. Neuron. https://doi.org/10.1016/j.neuron.2018.02.027	-0.3219	0.0681	-4.7239	2.3138e-06	-0.0016	0.0058	-0.2781	0.0592	-4.6993	2.6107e-06	-0.0043	0.0065	-0.2688	0.0577	-4.6614	3.1402e-06	-0.003	0.0066	-0.2983	0.0537	-5.5504	2.8504e-08	-0.0046968	0.0065	-0.2941	0.055	-5.3487	8.8572e-08	-0.0045677	0.0067	-0.295	0.0559	-5.2755	1.3238e-07	-0.0029775	0.0064	-0.2899	0.0548	-5.2897	1.2255e-07	-0.002	0.0064	-0.2684	0.054	-4.9743	6.5484e-07	-0.0084	0.0067
Anorexia	Watson, H.J., Yilmaz, Z., Thornton, L.M. et al. Genome-wide association study identifies eight risk loci and implicates metabo-psychiatric origins for anorexia nervosa. Nat Genet 51, 1207–1214 (2019). https://doi.org/10.1038/s41588-019-0439-2	0.0892	0.0312	2.8617	0.004214	-0.012	0.0068	0.0819	0.0274	2.9894	0.0027949	-0.0138	0.0075	0.0769	0.0264	2.9169	0.0035357	-0.0141	0.0073	0.1094	0.025	4.3835	1.1679e-05	-0.010054	0.0082	0.128	0.0259	4.9499	7.4252e-07	-0.01142	0.0083	0.1103	0.0266	4.1405	3.4654e-05	-0.0081787	0.0082	0.1089	0.0262	4.1528	3.2845e-05	-0.0088	0.008	0.1141	0.0261	4.3751	1.2136e-05	-0.0147	0.0084
Autism Spectrum Disorder	Grove J, Ripke S, Als TD, et al. Identification of common genetic risk variants for autism spectrum disorder. Nat Genet. 2019;51(3):431‐444. doi:10.1038/s41588-019-0344-8	0.2084	0.0354	5.878	4.1524e-09	-0.0112	0.0076	0.2064	0.0305	6.7639	1.3437e-11	-0.0102	0.0082	0.1981	0.0316	6.2735	3.5301e-10	-0.0067	0.0088	0.216	0.0282	7.6603	1.8543e-14	-0.017107	0.01	0.2181	0.0291	7.5016	6.3033e-14	-0.017456	0.0099	0.212	0.0281	7.5473	4.4424e-14	-0.01264	0.0092	0.207	0.0286	7.2424	4.4075e-13	-0.01	0.0095	0.2274	0.0289	7.8596	3.8522e-15	-0.0176	0.0098
Age first birth	Barban, N. et al. Genome-wide analysis identifies 12 loci influencing human reproductive behavior. Nature genetics 48, 1462 (2016).	0.4542	0.0273	16.6226	4.7842e-62	0.0143	0.0067	0.4387	0.023	19.083	3.4965e-81	0.0198	0.0073	0.429	0.023	18.6726	8.2668e-78	0.0224	0.0074	0.6206	0.0205	30.293	1.4162e-201	0.059469	0.0088	0.5945	0.0207	28.6804	6.7017e-181	0.052002	0.0086	0.5297	0.0207	25.6343	6.3341e-145	0.03717	0.0081	0.5226	0.0207	25.2727	6.3831e-141	0.0391	0.0082	0.529	0.0204	25.9738	9.7927e-149	0.0435	0.0084
Age at smoking initiation	Liu, M. et al. Association studies of up to 1.2 million individuals yield new insights into the genetic etiology of tobacco and alcohol use. Nature genetics 51, 237 (2019).	0.3591	0.0262	13.6833	1.2771e-42	0.0197	0.0064	0.341	0.025	13.6295	2.6751e-42	0.0295	0.007	0.3366	0.0244	13.8139	2.1008e-43	0.0281	0.0069	0.5134	0.0221	23.1946	5.1609e-119	0.080852	0.0074	0.4901	0.0216	22.7246	2.5616e-114	0.066876	0.0071	0.4378	0.0229	19.1336	1.3258e-81	0.050331	0.0072	0.4325	0.0223	19.3587	1.7226e-83	0.0496	0.0071	0.43	0.0225	19.1366	1.2523e-81	0.0536	0.0073
Alzheimer	Marioni, Riccardo; Harris, Sarah; Zhang, Qian; McRae, Allan; Hagenaars, Saskia; Hill, David; Davies, Gail; Ritchie, Craig; Gale, Catharine; Starr, John; Goate, Alison; Porteous, David; Yang, Jian; Evans, Kathryn; Deary, Ian; Wray, Naomi; Visscher, Peter. (2019). https://doi.org/10.7488/ds/2578.	-0.208	0.0732	-2.8413	0.004493	0.0146	0.006	-0.1658	0.0597	-2.7781	0.0054673	0.0063	0.0061	-0.1802	0.0624	-2.8865	0.0038957	0.006	0.0063	-0.1813	0.0579	-3.131	0.0017421	0.012193	0.0069	-0.1615	0.055	-2.9346	0.0033395	0.013532	0.0068	-0.1453	0.0544	-2.6694	0.0075976	0.0073696	0.0068	-0.1558	0.0563	-2.7692	0.0056199	0.0075	0.0069	-0.1508	0.0545	-2.7681	0.0056376	0.0065	0.0067
Coronary artery disease	Nikpay, M. et al. A comprehensive 1000 Genomes–based genome-wide association meta-analysis of coronary artery disease. Nature genetics 47, 1121 (2015).	-0.145	0.0228	-6.3728	1.8559e-10	-0.0168	0.006	-0.132	0.02	-6.6076	3.9058e-11	-0.0258	0.0069	-0.1316	0.0194	-6.7875	1.1409e-11	-0.0233	0.0069	-0.2103	0.0199	-10.5934	3.1968e-26	-0.067285	0.0077	-0.1867	0.02	-9.3287	1.072e-20	-0.057715	0.0076	-0.1438	0.0194	-7.4295	1.0903e-13	-0.045763	0.0071	-0.1424	0.019	-7.5113	5.8545e-14	-0.0438	0.0072	-0.1596	0.0192	-8.3051	9.9732e-17	-0.0498	0.0075
Cannabis use disorder	Demontis, D., Rajagopal, V.M., Thorgeirsson, T.E. et al. Genome-wide association study implicates CHRNA2 in cannabis use disorder. Nat Neurosci 22, 1066–1074 (2019). https://doi.org/10.1038/s41593-019-0416-1	-0.3082	0.0354	-8.7169	2.8594e-18	-0.0026	0.0059	-0.2855	0.0342	-8.3572	6.4249e-17	-0.0045	0.0068	-0.2896	0.0346	-8.3705	5.7391e-17	-0.005	0.0071	-0.4286	0.0302	-14.2128	7.6336e-46	0.0011212	0.007	-0.3646	0.0307	-11.8845	1.4249e-32	-5.8846e-05	0.0069	-0.3295	0.0321	-10.2552	1.1215e-24	-0.004044	0.0067	-0.331	0.0326	-10.1675	2.7693e-24	-0.0048	0.007	-0.3275	0.0321	-10.1904	2.1897e-24	-0.0043	0.0071
Cigarettes per day	Liu, M. et al. Association studies of up to 1.2 million individuals yield new insights into the genetic etiology of tobacco and alcohol use. Nature genetics 51, 237 (2019).	-0.1205	0.0265	-4.5489	5.3917e-06	-0.0072	0.0071	-0.1026	0.0242	-4.2467	2.1699e-05	-0.0099	0.0075	-0.0943	0.0231	-4.0732	4.6381e-05	-0.0104	0.0074	-0.2079	0.0232	-8.9635	3.1455e-19	-0.019038	0.0079	-0.203	0.0245	-8.2757	1.2769e-16	-0.012178	0.0082	-0.1545	0.0239	-6.4548	1.0837e-10	-0.0063582	0.0081	-0.1472	0.0231	-6.3816	1.7521e-10	-0.0073	0.008	-0.157	0.0234	-6.7223	1.7883e-11	-0.0096	0.0082
Educational Attainment (non-cognitive)	Demange, P. et al. Investigating the genetic architecture of noncognitive skills using GWAS-by-subtraction. Nature Genetics, 53, 35-44 (2021).	0.0249	0.0245	1.0148	0.31022	-0.3792	0.0074	0.0047	0.0217	0.217	0.82822	-0.4119	0.0084	0.0005	0.0215	0.0214	0.98289	-0.403	0.0084	0.3568	0.0189	18.8932	1.2967e-79	-0.034691	0.0089	0.3647	0.0186	19.6375	7.3908e-86	-0.018093	0.0086	0.2017	0.0202	9.9963	1.5828e-23	-0.18408	0.0085	0.1963	0.0201	9.7656	1.5811e-22	-0.1778	0.0086	0.206	0.02	10.3116	6.248e-25	-0.198	0.0085
Educational Attainment	Lee, J. J. et al. Gene discovery and polygenic prediction from a genome-wide association study of educational attainment in 1.1 million individuals. Nat Genet, doi:10.1038/s41588-018-0147-3 (2018).	0.6932	0.0137	50.7105	0	0.1492	0.0102	0.6827	0.0107	64.0163	0	0.1879	0.0115	0.6776	0.0103	65.6852	0	0.1947	0.0117	0.8681	0.0059	148.07	0	0.40138	0.0145	0.881	0.0057	154.903	0	0.42065	0.0142	0.8079	0.0074	109.323	0	0.33408	0.0131	0.8032	0.0071	112.757	0	0.3394	0.0132	0.8086	0.007	116.241	0	0.3511	0.0139
Brain surface area	Grasby, K. L., Jahanshad, N., Painter, J. N., Colodro-Conde, L., Bralten, J., Hibar, D. P., ... & Van Rooij, D. (2020). The genetic architecture of the human cerebral cortex. Science, 367(6484), eaay6690.	0.1963	0.0322	6.0956	1.0901e-09	0.0188	0.0065	0.2022	0.0284	7.1321	9.8859e-13	0.0297	0.0066	0.2059	0.028	7.3519	1.9534e-13	0.0305	0.0066	0.2491	0.0266	9.3636	7.7043e-21	0.030348	0.0076	0.23	0.0265	8.6833	3.8457e-18	0.025655	0.0073	0.2119	0.0272	7.7841	7.0192e-15	0.026931	0.0071	0.2146	0.0271	7.9257	2.2694e-15	0.0277	0.0071	0.221	0.0269	8.2213	2.0137e-16	0.0365	0.0072
Brain thickness	Grasby, K. L., Jahanshad, N., Painter, J. N., Colodro-Conde, L., Bralten, J., Hibar, D. P., ... & Van Rooij, D. (2020). The genetic architecture of the human cerebral cortex. Science, 367(6484), eaay6690.	0.0415	0.0345	1.2042	0.22852	-0.0017	0.0055	0.0419	0.032	1.3099	0.19024	0.0037	0.0064	0.0293	0.0325	0.9034	0.36629	0.0061	0.0067	0.075	0.029	2.5906	0.0095811	-0.0030401	0.0067	0.0571	0.0293	1.9472	0.051508	0.0013295	0.0064	0.0609	0.0296	2.0541	0.039968	0.0027221	0.0065	0.0517	0.03	1.7214	0.085178	0.0047	0.0067	0.0458	0.0299	1.5336	0.12514	0.0057	0.0067
HDL cholesterol	Teslovich, T. M. et al. Biological, clinical and population relevance of 95 loci for blood lipids. Nature 466, 707-713 (2010).	0.0824	0.0228	3.6196	0.00029507	-0.0103	0.006	0.0725	0.0206	3.5184	0.00043424	-0.0058	0.0066	0.0733	0.0201	3.6511	0.00026114	-0.0051	0.0069	0.1203	0.0191	6.3089	2.8094e-10	-0.0089768	0.0074	0.1285	0.0193	6.6463	3.0051e-11	-0.0075967	0.0072	0.1021	0.02	5.1136	3.1604e-07	-0.0069635	0.007	0.1025	0.0196	5.2225	1.7653e-07	-0.0066	0.0072	0.1015	0.0192	5.2844	1.2613e-07	-0.0028	0.0073
Household income	Hill, W. D. et al. Molecular genetic contributions to social deprivation and household income in UK Biobank. Current Biology 26, 3083-3089 (2016).	0.6079	0.0214	28.3775	3.8293e-177	0.1253	0.0071	0.5918	0.0191	31.0277	2.2792e-211	0.1572	0.008	0.588	0.0188	31.2559	1.8547e-214	0.1641	0.008	0.7639	0.0134	57.0985	0	0.32171	0.0098	0.7539	0.0138	54.5108	0	0.32306	0.0095	0.6872	0.0159	43.1562	0	0.25161	0.0088	0.6838	0.0158	43.2241	0	0.2574	0.0088	0.6903	0.0158	43.6622	0	0.2737	0.0093
LDL cholesterol	Teslovich, T. M. et al. Biological, clinical and population relevance of 95 loci for blood lipids. Nature 466, 707-713 (2010).	-0.0439	0.0238	-1.8398	0.065796	0.0026	0.0064	-0.0411	0.0218	-1.8836	0.059618	-0.0017	0.0074	-0.0455	0.0204	-2.2289	0.025821	-0.002	0.0073	-0.0753	0.0226	-3.3281	0.00087435	0.00069142	0.0077	-0.0636	0.0224	-2.8349	0.0045842	-0.0026282	0.0072	-0.046	0.0214	-2.1557	0.031108	-0.002888	0.0071	-0.0493	0.0204	-2.4229	0.015397	-0.0032	0.0072	-0.0565	0.0208	-2.7177	0.0065746	-0.0028	0.0076
MDD	Howard et al. (2019) Genome-wide meta-analysis of depression identifies 102 independent variants and highlights the importance of the prefrontal brain regions	-0.1033	0.0232	-4.4489	8.6308e-06	-0.019	0.0068	-0.11	0.0212	-5.1951	2.0465e-07	-0.0157	0.0079	-0.1079	0.0207	-5.2025	1.9658e-07	-0.0141	0.0081	-0.1859	0.0196	-9.4616	3.0333e-21	-0.045157	0.0089	-0.1535	0.0205	-7.4723	7.8817e-14	-0.033891	0.0088	-0.127	0.0209	-6.0798	1.2037e-09	-0.018823	0.0087	-0.1232	0.0205	-6.0055	1.907e-09	-0.0157	0.0089	-0.1274	0.0204	-6.2545	3.988e-10	-0.0248	0.0089
Nicotine depence	Hancock, D. B. et al. Genome-wide association study across European and African American ancestries identifies a SNP in DNMT3B contributing to nicotine dependence. Molecular psychiatry 23, 1911-1919, doi:10.1038/mp.2017.193 (2018).	-0.2347	0.052	-4.5136	6.3742e-06	0.012	0.0056	-0.201	0.0452	-4.4467	8.7217e-06	0.0099	0.0063	-0.1835	0.0443	-4.1449	3.3989e-05	0.0081	0.0064	-0.3297	0.0446	-7.398	1.3822e-13	0.012902	0.007	-0.2757	0.0432	-6.3862	1.7001e-10	0.0088538	0.0067	-0.2589	0.0435	-5.9529	2.634e-09	0.012262	0.0067	-0.2481	0.0427	-5.8064	6.3814e-09	0.0115	0.0066	-0.239	0.0431	-5.5487	2.878e-08	0.0078	0.0069
Nr of children	Barban, N. et al. Genome-wide analysis identifies 12 loci influencing human reproductive behavior. Nature genetics 48, 1462 (2016).	-0.1907	0.0325	-5.859	4.6557e-09	-0.0013	0.0058	-0.1925	0.0269	-7.1708	7.4544e-13	-0.0005	0.0065	-0.1901	0.0266	-7.1429	9.1377e-13	-0.0021	0.0064	-0.2435	0.027	-9.0237	1.8178e-19	-0.012984	0.0074	-0.2129	0.0264	-8.0708	6.9835e-16	-0.0073761	0.0072	-0.2077	0.0249	-8.3393	7.4751e-17	-0.0057787	0.0067	-0.2075	0.0248	-8.3549	6.549e-17	-0.007	0.0068	-0.2089	0.0252	-8.2958	1.0787e-16	-0.0037	0.007
PTSD	Nievergelt, C.M., Maihofer, A.X., Klengel, T. et al. International meta-analysis of PTSD genome-wide association studies identifies sex- and ancestry-specific genetic risk loci. Nat Commun 10, 4558 (2019). https://doi.org/10.1038/s41467-019-12576-w	-0.1744	0.054	-3.2323	0.001228	-0.0197	0.0061	-0.195	0.0492	-3.9627	7.4095e-05	-0.0229	0.0065	-0.1693	0.0479	-3.5351	0.00040756	-0.0267	0.0066	-0.3079	0.0488	-6.3097	2.7956e-10	-0.035797	0.0071	-0.2555	0.0471	-5.4205	5.9423e-08	-0.035621	0.0068	-0.2437	0.0483	-5.0436	4.5692e-07	-0.025306	0.0068	-0.2235	0.0471	-4.7443	2.0921e-06	-0.0287	0.007	-0.2242	0.0472	-4.7515	2.019e-06	-0.0353	0.0072
Reumathoid Arthritis	Okada, Y., Wu, D., Trynka, G. et al. Genetics of rheumatoid arthritis contributes to biology and drug discovery. Nature 506, 376–381 (2014). https://doi.org/10.1038/nature12873	-0.1326	0.0296	-4.4826	7.3727e-06	-0.0038	0.0057	-0.1281	0.0274	-4.6731	2.9663e-06	-0.0079	0.0063	-0.1309	0.0275	-4.764	1.898e-06	-0.0059	0.0064	-0.1685	0.0251	-6.7254	1.7514e-11	-0.012789	0.0064	-0.1801	0.0251	-7.162	7.9526e-13	-0.010456	0.0064	-0.1491	0.0251	-5.9415	2.8234e-09	-0.011553	0.0065	-0.1498	0.0254	-5.8981	3.6778e-09	-0.0101	0.0066	-0.1596	0.0254	-6.2789	3.4089e-10	-0.0092	0.0066
Schizophrenia	Psychiatric Genomics Consortium. Mapping genomic loci implicates genes and synaptic biology in schizophrenia. Nature. 2022. 604(502-508)	-0.2419	0.0216	-11.2056	3.8275e-29	-0.0105	0.0085	-0.2425	0.0187	-12.9655	1.9187e-38	-0.0109	0.0095	-0.2405	0.019	-12.6845	7.2104e-37	-0.0103	0.0098	-0.1728	0.0183	-9.4498	3.3963e-21	-0.024762	0.0111	-0.1411	0.0184	-7.6583	1.8848e-14	-0.020602	0.0103	-0.1853	0.0184	-10.0461	9.5602e-24	-0.014696	0.0102	-0.1831	0.0187	-9.8167	9.5441e-23	-0.0153	0.0106	-0.1767	0.0185	-9.5538	1.2498e-21	-0.0218	0.0104
Subjective wellbeing	Okbay, A. et al. Genetic variants associated with subjective well-being, depressive symptoms, and neuroticism identified through genome-wide analyses. Nature genetics 48, 624 (2016).	0.0359	0.0393	0.913	0.36124	-0.0009	0.007	0.004	0.0352	0.1148	0.9086	0.0072	0.0078	0.0042	0.0354	0.1184	0.90571	0.0047	0.008	0.0918	0.0316	2.909	0.003626	-0.0014336	0.0086	0.0619	0.0315	1.9656	0.049348	0.0014176	0.008	0.0232	0.0328	0.7076	0.4792	0.0063291	0.0081	0.0224	0.0331	0.6772	0.49827	0.0045	0.0082	0.0271	0.0327	0.8282	0.40758	0.0064	0.0085
Smoking cessation	Liu, M. et al. Association studies of up to 1.2 million individuals yield new insights into the genetic etiology of tobacco and alcohol use. Nature genetics 51, 237 (2019).	0.308	0.0325	9.4822	2.4901e-21	0.0199	0.006	0.2994	0.0304	9.8351	7.9477e-23	0.0149	0.0067	0.3016	0.0287	10.5091	7.842e-26	0.0206	0.0064	0.4529	0.0265	17.0716	2.4167e-65	0.054504	0.0077	0.4295	0.0272	15.7964	3.2919e-56	0.038007	0.0073	0.3682	0.029	12.6966	6.1768e-37	0.028448	0.0073	0.3686	0.0278	13.2719	3.37e-40	0.0322	0.007	0.3721	0.0282	13.2008	8.6769e-40	0.0274	0.0074
Smoking initiation	Liu, M. et al. Association studies of up to 1.2 million individuals yield new insights into the genetic etiology of tobacco and alcohol use. Nature genetics 51, 237 (2019).	-0.2015	0.0225	-8.9381	3.9581e-19	-0.0095	0.007	-0.1865	0.0195	-9.5605	1.1717e-21	-0.0141	0.0076	-0.184	0.0188	-9.7775	1.406e-22	-0.0112	0.0075	-0.3002	0.0173	-17.3851	1.0704e-67	-0.039635	0.0084	-0.2613	0.0178	-14.7002	6.4306e-49	-0.017099	0.0083	-0.2293	0.0183	-12.5529	3.8331e-36	-0.016956	0.0081	-0.2278	0.0177	-12.8593	7.6231e-38	-0.0163	0.0081	-0.2225	0.0176	-12.6518	1.0938e-36	-0.0163	0.0079
Tourette syndrome	Scharf JM, Yu D, Mathews CA, et al. Genome-wide association study of Tourette's syndrome. Mol Psychiatry. 2013;18(6):721‐728. doi:10.1038/mp.2012.69	-0.0513	0.0452	-1.1366	0.25571	-0.0147	0.0066	-0.0435	0.0386	-1.1254	0.2604	-0.0145	0.0072	-0.0486	0.0385	-1.2613	0.20718	-0.0153	0.0071	-0.1173	0.0376	-3.1168	0.0018282	-0.017016	0.0077	-0.1156	0.0368	-3.1435	0.0016694	-0.017172	0.0075	-0.0934	0.0373	-2.501	0.012386	-0.012134	0.0076	-0.0974	0.0372	-2.6225	0.0087285	-0.0119	0.0075	-0.0893	0.0369	-2.4227	0.015405	-0.0145	0.0074
Reaction time	Davies, G. et al. Genome-wide association study of cognitive functions and educational attainment in UK Biobank (N= 112 151). Molecular psychiatry 21, 758-767 (2016).	-0.204	0.034	-6.0043	1.9218e-09	-0.0428	0.0062	-0.1773	0.0314	-5.6497	1.6071e-08	-0.0596	0.0072	-0.1717	0.0313	-5.4906	4.005e-08	-0.0633	0.0072	-0.2153	0.0281	-7.6484	2.0356e-14	-0.095311	0.008	-0.1872	0.0287	-6.5273	6.695e-11	-0.082914	0.008	-0.17	0.0303	-5.6144	1.9727e-08	-0.076221	0.0081	-0.1662	0.0304	-5.4643	4.6482e-08	-0.0785	0.0082	-0.1746	0.0292	-5.9897	2.1028e-09	-0.0769	0.0081
Self-rated health	Harris, S. E. et al. Molecular genetic contributions to self-rated health. International journal of epidemiology 46, 994-1009 (2016).	-0.3847	0.0283	-13.5994	4.0361e-42	-0.0394	0.0064	-0.3753	0.0257	-14.6208	2.0708e-48	-0.0544	0.0072	-0.3809	0.0252	-15.1061	1.4752e-51	-0.0524	0.0072	-0.5046	0.0234	-21.5199	1.0128e-102	-0.11333	0.0079	-0.4999	0.0236	-21.1577	2.3428e-99	-0.10232	0.0078	-0.4331	0.024	-18.0338	1.0573e-72	-0.078052	0.0073	-0.4371	0.0239	-18.3121	6.6286e-75	-0.0757	0.0072	-0.4461	0.0238	-18.7409	2.2972e-78	-0.0845	0.0076
Tiredness	Deary, V. et al. Genetic contributions to self-reported tiredness. Molecular psychiatry 23, 609 (2018).	-0.1143	0.0354	-3.2258	0.0012561	-0.0313	0.0059	-0.1293	0.0333	-3.8805	0.00010426	-0.0323	0.0071	-0.1346	0.0325	-4.1378	3.5067e-05	-0.0309	0.0073	-0.2379	0.0294	-8.1051	5.2715e-16	-0.05885	0.0076	-0.2218	0.03	-7.3917	1.4494e-13	-0.050789	0.0077	-0.1731	0.031	-5.5749	2.4773e-08	-0.036475	0.0073	-0.177	0.0305	-5.8036	6.4903e-09	-0.0338	0.0073	-0.1796	0.0307	-5.8534	4.8165e-09	-0.0423	0.0079
Age at menarche	Elks, C. E. et al. Thirty new loci for age at menarche identified by a meta-analysis of genome-wide association studies. Nature genetics 42, 1077 (2010).	-0.0152	0.024	-0.6313	0.52786	0.0042	0.0066	-0.0145	0.0218	-0.6648	0.50621	0.0078	0.0071	-0.0173	0.0221	-0.7837	0.43321	0.005	0.0075	0.0275	0.0209	1.3179	0.18754	0.0062868	0.0076	0.0183	0.0206	0.8887	0.37415	0.0055508	0.0076	-0.0018	0.021	-0.0837	0.93328	0.0084558	0.0075	-0.005	0.0213	-0.2327	0.81599	0.0065	0.0079	-0.0028	0.0206	-0.1361	0.89171	0.0073	0.0079
Age at menopauze	Day, F. R. et al. Large-scale genomic analyses link reproductive aging to hypothalamic signaling, breast cancer susceptibility and BRCA1-mediated DNA repair. Nature genetics 47, 1294 (2015).	0.1127	0.0307	3.6718	0.00024081	-0.0043	0.0063	0.103	0.0277	3.7129	0.00020489	-0.0055	0.0072	0.0943	0.0273	3.454	0.00055234	-0.0039	0.0073	0.1467	0.0271	5.4097	6.3143e-08	-0.0024427	0.0082	0.1461	0.0269	5.4245	5.8102e-08	-0.001852	0.0081	0.1238	0.027	4.585	4.5408e-06	-0.0075699	0.0077	0.1201	0.0269	4.4609	8.161e-06	-0.0064	0.0078	0.128	0.0268	4.7755	1.7922e-06	-0.0061	0.0081
Anxiety	Purves KL, Coleman JRI, Meier SM, et al. A major role for common genetic variation in anxiety disorders [published online ahead of print, 2019 Nov 20]. Mol Psychiatry. 2019;10.1038/s41380-019-0559-1. doi:10.1038/s41380-019-0559-1	-0.1778	0.0333	-5.3445	9.0657e-08	-0.0088	0.0069	-0.1601	0.0294	-5.4375	5.4046e-08	-0.0209	0.0071	-0.1569	0.0285	-5.5114	3.5591e-08	-0.0211	0.0073	-0.2521	0.0271	-9.2917	1.5187e-20	-0.027543	0.0084	-0.2161	0.028	-7.7278	1.0938e-14	-0.025961	0.0081	-0.1824	0.0289	-6.3177	2.6542e-10	-0.021561	0.0078	-0.1789	0.0283	-6.3123	2.7499e-10	-0.0212	0.0078	-0.1836	0.0275	-6.6862	2.2909e-11	-0.0297	0.008
Asthma (adult onset)	Ferreira, M., Mathur, R., Vonk, J. M., Szwajda, A., Brumpton, B., Granell, R., et al. (2019). Genetic Architectures of Childhood- and Adult-Onset Asthma Are Partly Distinct. American journal of human genetics, 104(4), 665–684. https://doi.org/10.1016/j.ajhg.2019.02.022	-0.0059	0.0296	-0.1991	0.84221	0.0149	0.0068	0.0077	0.0238	0.3251	0.74514	0.012	0.0073	-0.0021	0.0235	-0.0905	0.92788	0.0155	0.0073	-0.0281	0.0218	-1.2937	0.19579	0.018377	0.0075	-0.0151	0.0217	-0.6936	0.48792	0.022052	0.0072	0.0164	0.022	0.7476	0.45467	0.014483	0.0073	0.0095	0.0217	0.4385	0.66106	0.0178	0.0073	-0.0006	0.0219	-0.0267	0.97868	0.0204	0.0074
Asthma (childhood onset)	Ferreira, M., Mathur, R., Vonk, J. M., Szwajda, A., Brumpton, B., Granell, R., et al. (2019). Genetic Architectures of Childhood- and Adult-Onset Asthma Are Partly Distinct. American journal of human genetics, 104(4), 665–684. https://doi.org/10.1016/j.ajhg.2019.02.022	0.0835	0.0279	2.9888	0.0028005	0.0193	0.0072	0.0795	0.0233	3.4129	0.00064287	0.0238	0.0077	0.0772	0.0228	3.3878	0.00070453	0.0241	0.0078	0.0952	0.0227	4.189	2.8015e-05	0.046156	0.0081	0.1039	0.0226	4.5872	4.4929e-06	0.047129	0.0077	0.0944	0.0222	4.2598	2.0458e-05	0.032689	0.0076	0.0942	0.0216	4.3603	1.2991e-05	0.0317	0.0076	0.0962	0.0219	4.3899	1.134e-05	0.0394	0.0078
Atopic dermatitis	Paternoster, L., Standl, M., Waage, J. et al. Multi-ancestry genome-wide association study of 21,000 cases and 95,000 controls identifies new risk loci for atopic dermatitis. Nat Genet 47, 1449–1456 (2015). https://doi.org/10.1038/ng.3424	-0.0715	0.0508	-1.4055	0.15987	0.0087	0.0058	-0.0825	0.043	-1.9196	0.054905	0.0104	0.0059	-0.0978	0.0438	-2.2299	0.025755	0.0135	0.0061	-0.0442	0.0381	-1.161	0.24565	0.0047828	0.0064	-0.0294	0.0392	-0.7501	0.45322	0.0011024	0.0063	-0.066	0.0389	-1.6955	0.089976	0.0062916	0.0059	-0.0762	0.0394	-1.9334	0.053182	0.0084	0.0061	-0.0596	0.0392	-1.5191	0.12873	0.0065	0.0063
Bipolar disorder	Stahl, E.A., Breen, G., Forstner, A.J. et al. Genome-wide association study identifies 30 loci associated with bipolar disorder. Nat Genet 51, 793–803 (2019). https://doi.org/10.1038/s41588-019-0397-8	-0.0727	0.0223	-3.2676	0.0010848	-0.0014	0.0069	-0.0827	0.019	-4.3554	1.3285e-05	0.0002	0.0075	-0.0782	0.0193	-4.0518	5.0827e-05	-0.0006	0.0077	-0.0267	0.0183	-1.4587	0.14465	-0.0059568	0.0085	0.0146	0.0191	0.7637	0.44505	-0.0058976	0.0085	-0.0278	0.0184	-1.5073	0.13174	0.0019256	0.0081	-0.024	0.0187	-1.2856	0.19859	0.0016	0.0084	-0.0218	0.0185	-1.1798	0.23808	-0.003	0.0084
Birth weight	Horikoshi, M. et al. Genome-wide associations for birth weight and correlations with adult disease. Nature 538, 248-252 (2016).	0.114	0.029	3.9351	8.3152e-05	0.0076	0.0068	0.1106	0.024	4.6143	3.9446e-06	0.0144	0.0074	0.1049	0.0235	4.4552	8.3796e-06	0.0158	0.0074	0.2039	0.0241	8.4572	2.7395e-17	0.036304	0.0087	0.1391	0.0246	5.6645	1.4742e-08	0.016241	0.0081	0.1304	0.024	5.4218	5.8985e-08	0.016831	0.0079	0.1257	0.0239	5.2588	1.4496e-07	0.018	0.0079	0.1344	0.0229	5.8688	4.3894e-09	0.0165	0.0078
BMI	Locke, A. E. et al. Genetic studies of body mass index yield new insights for obesity biology. Nature 518, 197-206 (2015).	-0.1279	0.0209	-6.1338	8.5831e-10	0.0025	0.0063	-0.1282	0.0187	-6.8716	6.3495e-12	0.0011	0.007	-0.1246	0.0181	-6.876	6.1564e-12	0.0003	0.0071	-0.1473	0.0191	-7.7151	1.2093e-14	-0.00049283	0.008	-0.1883	0.0182	-10.3281	5.2613e-25	-0.0025441	0.0077	-0.1555	0.0177	-8.7867	1.5403e-18	-0.0034069	0.0074	-0.1528	0.0174	-8.8007	1.3597e-18	-0.0041	0.0075	-0.1581	0.0173	-9.1304	6.8275e-20	-0.004	0.0077
Body Fat	Lu, Y. et al. New loci for body fat percentage reveal link between adiposity and cardiometabolic disease risk. Nature communications 7, 10495 (2016).	-0.147	0.035	-4.1953	2.7252e-05	-0.0054	0.0062	-0.1769	0.0316	-5.5976	2.1735e-08	0.0019	0.0068	-0.1789	0.0311	-5.7542	8.7073e-09	0.0034	0.0069	-0.2253	0.0281	-8.0186	1.0697e-15	0.0018143	0.0071	-0.2295	0.0287	-7.9862	1.3911e-15	-0.0016106	0.0075	-0.2065	0.0295	-7.0098	2.3861e-12	0.0030651	0.0072	-0.2078	0.0291	-7.1351	9.6718e-13	0.0042	0.0072	-0.2074	0.0291	-7.132	9.8936e-13	0.0011	0.0076
Caffeine	Cornelis, M. C. et al. Genome-wide meta-analysis identifies six novel loci associated with habitual coffee consumption. Molecular psychiatry 20, 647 (2015).	0.0143	0.0485	0.2947	0.76825	-0.0054	0.0064	0.0276	0.0429	0.643	0.52019	-0.0029	0.0068	0.0328	0.0419	0.7838	0.43319	-0.0026	0.0067	0.021	0.0406	0.5159	0.60594	-0.0035927	0.0078	0.0296	0.04	0.7399	0.45938	-0.0043414	0.0076	0.0461	0.0406	1.1349	0.25642	-0.0064576	0.0069	0.0491	0.0397	1.2376	0.21586	-0.0067	0.0069	0.039	0.0401	0.974	0.33007	-0.0041	0.0074
Childhood IQ	Benyamin, B. et al. Childhood intelligence is heritable, highly polygenic and associated with FNBP1L. Molecular psychiatry 19, 253 (2014).	0.7151	0.0695	10.2951	7.4136e-25	0.0014	0.0088	0.7397	0.0646	11.4496	2.3613e-30	0.0009	0.0088	0.7387	0.0637	11.596	4.3202e-31	0.001	0.0091	0.7952	0.0656	12.1162	8.6738e-34	0.0062535	0.0104	0.784	0.0641	12.2364	1.9853e-34	0.0068372	0.01	0.7951	0.0645	12.3272	6.4661e-35	0.00045452	0.0093	0.7921	0.064	12.3669	3.9455e-35	0.0011	0.0096	0.7796	0.0637	12.2369	1.9754e-34	0.0065	0.0096
Chrohns disease	de Lange KM, Moutsianas L, Lee JC, et al. Genome-wide association study implicates immune activation of multiple integrin genes in inflammatory bowel disease. Nat Genet. 2017;49(2):256-261. doi:10.1038/ng.3760	0.1264	0.0303	4.1792	2.9256e-05	0.0011	0.0065	0.1155	0.0261	4.4224	9.76e-06	0.0023	0.0064	0.1036	0.0252	4.11	3.9573e-05	0.0073	0.0063	0.1751	0.0268	6.5438	5.9979e-11	-5.465e-05	0.0082	0.1741	0.0272	6.4088	1.4669e-10	0.001361	0.008	0.1463	0.0257	5.7028	1.1784e-08	0.001328	0.0071	0.136	0.0252	5.4081	6.369e-08	0.0049	0.0071	0.1419	0.026	5.4567	4.8498e-08	0.0062	0.0074
Type-2 Diabetes	Morris, A. P. et al. Large-scale association analysis provides insights into the genetic architecture and pathophysiology of type 2 diabetes. Nature genetics 44, 981 (2012).	-0.052	0.0419	-1.2418	0.21432	-0.0106	0.0068	-0.0504	0.0368	-1.3671	0.1716	-0.0166	0.0073	-0.0484	0.0368	-1.3166	0.18798	-0.0171	0.0075	-0.0749	0.0348	-2.1521	0.031387	-0.022622	0.0083	-0.0736	0.0344	-2.1359	0.032688	-0.022375	0.0081	-0.0411	0.0339	-1.2131	0.22508	-0.024238	0.0078	-0.0398	0.0341	-1.1661	0.24357	-0.0252	0.008	-0.0482	0.0348	-1.387	0.16544	-0.0259	0.0081
Family relationship satisfaction	Churchhouse, C. et al. Rapid GWAS of thousands of phenotypes for 337,000 samples in the UK biobank. Neale Lab (2017).	0.1368	0.0401	3.4109	0.00064747	0.014	0.0065	0.1086	0.035	3.1042	0.0019076	0.0179	0.007	0.1217	0.0346	3.5184	0.00043408	0.0156	0.007	0.1035	0.0312	3.3131	0.0009228	0.010052	0.0081	0.1235	0.032	3.8576	0.00011451	0.014405	0.0079	0.1181	0.0333	3.5515	0.00038306	0.01856	0.0076	0.1264	0.0332	3.8084	0.00013985	0.0167	0.0076	0.1246	0.0324	3.8422	0.00012191	0.0156	0.0076
Father's age at death	Pilling, L. C. et al. Human longevity is influenced by many genetic variants: evidence from 75,000 UK Biobank participants. Aging (Albany NY) 8, 547 (2016).	0.3561	0.0521	6.8389	7.9825e-12	0.0277	0.0058	0.3001	0.0486	6.1728	6.7108e-10	0.0374	0.0065	0.2988	0.0466	6.4118	1.4381e-10	0.036	0.0065	0.4783	0.0495	9.6586	4.5187e-22	0.067122	0.007	0.4529	0.0495	9.1536	5.5085e-20	0.051575	0.007	0.3659	0.0484	7.5677	3.7989e-14	0.050919	0.0072	0.3649	0.047	7.7669	8.0457e-15	0.0501	0.0072	0.3809	0.0474	8.0394	9.03e-16	0.0502	0.007
Epilepsy (focal)	Abou-Khalil et al. Genome-wide mega-analysis identifies 16 loci ... Nat Commun 9, 5269 (2018). https://doi.org/10.1038/s41467-018-07524-z	-0.3088	0.1183	-2.6095	0.0090683	0.0057	0.0076	-0.2585	0.1069	-2.4175	0.015626	0.0006	0.0087	-0.2685	0.1085	-2.4739	0.013364	0.0051	0.0091	-0.3277	0.11	-2.9802	0.0028807	0.0085213	0.0088	-0.3182	0.1102	-2.8862	0.0038988	0.0074492	0.0089	-0.2513	0.1001	-2.511	0.012038	3.6635e-05	0.0085	-0.2593	0.1024	-2.5329	0.011312	0.0037	0.0088	-0.2823	0.1055	-2.6755	0.0074619	0.0018	0.009
Frequency of friend/family visits	Churchhouse, C. et al. Rapid GWAS of thousands of phenotypes for 337,000 samples in the UK biobank. Neale Lab (2017).	0.3123	0.0296	10.5417	5.5485e-26	0.0252	0.0062	0.2891	0.027	10.6888	1.1486e-26	0.047	0.0073	0.2928	0.0273	10.7365	6.8613e-27	0.0482	0.0076	0.3567	0.0239	14.9332	2.0033e-50	0.064148	0.0079	0.3501	0.024	14.5709	4.302e-48	0.065339	0.0079	0.3359	0.0253	13.2897	2.6551e-40	0.055688	0.0078	0.3387	0.0254	13.3434	1.2948e-40	0.0569	0.008	0.326	0.0247	13.2115	7.5308e-40	0.0615	0.0079
Friends relationship satisfaction	Churchhouse, C. et al. Rapid GWAS of thousands of phenotypes for 337,000 samples in the UK biobank. Neale Lab (2017).	0.2238	0.0384	5.8228	5.7862e-09	0.0545	0.0069	0.2353	0.0336	6.996	2.6343e-12	0.0407	0.0071	0.2435	0.0332	7.3404	2.1289e-13	0.0423	0.0072	0.2557	0.0323	7.9245	2.2907e-15	0.026568	0.0085	0.2743	0.0323	8.4907	2.0541e-17	0.028678	0.0082	0.2722	0.0328	8.3111	9.4856e-17	0.03125	0.0079	0.2776	0.0324	8.5761	9.8126e-18	0.033	0.008	0.2674	0.0322	8.3115	9.4462e-17	0.03	0.0079
Epilepsy (generalized)	Abou-Khalil et al. Genome-wide mega-analysis identifies 16 loci ... Nat Commun 9, 5269 (2018). https://doi.org/10.1038/s41467-018-07524-z	-0.1373	0.0365	-3.7583	0.00017108	0.0193	0.0078	-0.111	0.0334	-3.3251	0.00088402	0.0237	0.0088	-0.1137	0.0327	-3.4758	0.00050926	0.0252	0.009	-0.0854	0.0318	-2.6883	0.0071818	0.028887	0.0102	-0.0951	0.0321	-2.9656	0.0030208	0.029144	0.01	-0.0797	0.0323	-2.4699	0.013515	0.021714	0.0094	-0.0805	0.0318	-2.5297	0.011416	0.0219	0.0094	-0.0979	0.0328	-2.9855	0.0028315	0.028	0.0101
Height	Wood, A. R. et al. Defining the role of common variation in the genomic and biological architecture of adult human height. Nature genetics 46, 1173 (2014)	0.0958	0.0186	5.151	2.5904e-07	0.0077	0.0095	0.1013	0.017	5.9495	2.6901e-09	0.0112	0.0098	0.102	0.0173	5.8993	3.6515e-09	0.0129	0.0101	0.2291	0.0169	13.5651	6.4516e-42	0.046375	0.0128	0.116	0.0163	7.1048	1.2048e-12	0.038604	0.0111	0.1142	0.0169	6.7643	1.3394e-11	0.026253	0.011	0.1148	0.0171	6.6946	2.1629e-11	0.0273	0.0113	0.1109	0.0164	6.7566	1.413e-11	0.0308	0.0111
Hip circumference	Shungin, D. et al. New genetic loci link adipose and insulin biology to body fat distribution. Nature 518, 187 (2015)	-0.0237	0.0238	-0.9977	0.31845	-0.0025	0.0062	-0.0216	0.021	-1.027	0.30444	-0.0037	0.0069	-0.02	0.0205	-0.9757	0.3292	-0.004	0.007	0.0106	0.0214	0.4946	0.62088	-0.0014104	0.0078	-0.0753	0.0205	-3.6786	0.00023454	-0.00084641	0.0072	-0.0416	0.0203	-2.0462	0.040733	-0.0055646	0.0072	-0.0408	0.0201	-2.0278	0.042579	-0.0055	0.0074	-0.043	0.0198	-2.1655	0.030351	-0.006	0.0073
Inflammatory Bowel Disease	de Lange KM, Moutsianas L, Lee JC, et al. Genome-wide association study implicates immune activation of multiple integrin genes in inflammatory bowel disease. Nat Genet. 2017;49(2):256-261. doi:10.1038/ng.3760	0.1122	0.0292	3.8379	0.00012411	0.001	0.0068	0.1015	0.0252	4.0234	5.7374e-05	0.0018	0.007	0.0898	0.0246	3.6511	0.00026113	0.0069	0.007	0.1378	0.0265	5.205	1.9404e-07	0.0041282	0.0085	0.1392	0.0273	5.0921	3.5415e-07	0.0043796	0.0083	0.1158	0.0256	4.5244	6.0573e-06	0.0028304	0.0076	0.1065	0.0252	4.2207	2.4353e-05	0.0064	0.0077	0.1144	0.0258	4.4264	9.5813e-06	0.0078	0.0079
Adult IQ	Savage, J.E., Jansen, P.R., Stringer, S. et al. Genome-wide association meta-analysis in 269,867 individuals identifies new genetic and functional links to intelligence. Nat Genet 50, 912–919 (2018). https://doi.org/10.1038/s41588-018-0152-6	0.9641	0.0059	162.055	0	0.6425	0.0112	0.9685	0.0041	233.851	0	0.7178	0.013	0.9667	0.0048	201.721	0	0.6798	0.0128	0.9014	0.0068	131.633	0	0.46339	0.0137	0.9154	0.0069	133.339	0	0.46379	0.0134	0.9621	0.0053	180.859	0	0.58236	0.0134	0.9618	0.0056	170.956	0	0.5538	0.0132	0.9618	0.0052	185.278	0	0.6106	0.0138
Job satisfaction	Churchhouse, C. et al. Rapid GWAS of thousands of phenotypes for 337,000 samples in the UK biobank. Neale Lab (2017).	-0.0101	0.0462	-0.2198	0.82603	-0.0031	0.0055	0.0162	0.0401	0.4046	0.68579	-0.0049	0.0059	0.0322	0.04	0.8035	0.42166	-0.0021	0.0059	-0.0341	0.037	-0.9216	0.35672	-0.012096	0.0068	-0.0494	0.0379	-1.3026	0.1927	-0.010094	0.0065	-0.0213	0.0384	-0.5539	0.57962	-0.0043527	0.0061	-0.0103	0.0383	-0.2688	0.78805	-0.0023	0.0061	-0.0083	0.0374	-0.2229	0.82362	-0.0084	0.0061
Loneliness	Abdellaoui et al. Phenome-wide investigation of health outcomes associated with genetic predisposition to loneliness. Human Molecular Genetics, 28 (22) 3853-3865. (2019)	-0.18	0.0268	-6.7082	1.9707e-11	-0.05	0.007	-0.1802	0.0252	-7.1582	8.1764e-13	-0.0518	0.0077	-0.1748	0.0243	-7.1797	6.9857e-13	-0.0518	0.0076	-0.2874	0.0213	-13.5001	1.5611e-41	-0.10246	0.0081	-0.2582	0.022	-11.7376	8.1738e-32	-0.085626	0.0083	-0.2156	0.0229	-9.4121	4.8631e-21	-0.065011	0.0079	-0.211	0.0225	-9.3965	5.6399e-21	-0.0629	0.0078	-0.2167	0.023	-9.4112	4.9067e-21	-0.0676	0.0082
Lupus	Julià, A., López-Longo, F.J., Pérez Venegas, J.J. et al. Genome-wide association study meta-analysis identifies five new loci for systemic lupus erythematosus. Arthritis Res Ther 20, 100 (2018). https://doi.org/10.1186/s13075-018-1604-1	0.143	0.0364	3.9236	8.7231e-05	-0.0019	0.0066	0.1006	0.0342	2.9425	0.0032559	0.0057	0.0077	0.1033	0.0343	3.0106	0.002607	0.0042	0.008	0.1204	0.0324	3.7144	0.00020367	-0.0044875	0.0082	0.1208	0.0332	3.6325	0.00028071	-0.0036043	0.0081	0.0947	0.0334	2.834	0.0045973	0.0040717	0.0079	0.0967	0.0336	2.8783	0.0039978	0.0033	0.0081	0.106	0.0339	3.1255	0.0017752	0.0027	0.0084
Myocardial Infarction	Nikpay, M. et al. A comprehensive 1000 Genomes–based genome-wide association meta-analysis of coronary artery disease. Nature genetics 47, 1121 (2015).	-0.211	0.0506	-4.1706	3.0378e-05	0.0102	0.0136	-0.1767	0.0465	-3.7998	0.00014484	0.0073	0.0152	-0.1833	0.0463	-3.9618	7.4398e-05	0.0094	0.0153	-0.2061	0.039	-5.2801	1.2913e-07	-0.012186	0.015	-0.1836	0.0406	-4.5178	6.2486e-06	-0.013768	0.015	-0.1638	0.0436	-3.7588	0.0001707	-0.0047523	0.0153	-0.168	0.0433	-3.8842	0.00010266	-0.0032	0.0154	-0.1796	0.0423	-4.2491	2.1462e-05	-0.0048	0.0156
Mother's age at death	Pilling, L. C. et al. Human longevity is influenced by many genetic variants: evidence from 75,000 UK Biobank participants. Aging (Albany NY) 8, 547 (2016).	0.4407	0.0632	6.9684	3.2065e-12	0.0106	0.0061	0.4262	0.0588	7.2454	4.3132e-13	0.009	0.0067	0.4305	0.0588	7.3255	2.3796e-13	0.0068	0.007	0.5127	0.0592	8.653	5.0152e-18	0.0629	0.0074	0.5046	0.0583	8.653	5.0169e-18	0.035313	0.0071	0.4662	0.0576	8.0942	5.7661e-16	0.024358	0.0067	0.4698	0.0576	8.1623	3.2859e-16	0.0234	0.007	0.4799	0.0581	8.2665	1.38e-16	0.0231	0.0071
Parkinson's Disease	Mike A. Nalls et al. for the International Parkinson’s Disease Genomics Consortium (2020, bioRxiv).	0.0146	0.0314	0.4647	0.64212	0.0137	0.0063	0.0319	0.027	1.179	0.23841	0.0118	0.0068	0.0411	0.0263	1.5675	0.117	0.0111	0.0067	0.0739	0.0262	2.8198	0.0048047	0.01574	0.0073	0.0741	0.0257	2.882	0.0039513	0.014051	0.0072	0.0557	0.0259	2.15	0.031559	0.013053	0.0072	0.0606	0.0252	2.4074	0.016068	0.0131	0.0071	0.0652	0.0249	2.6173	0.0088617	0.0106	0.0071
Rsk Taking	Linner et al. (2019). Genome-wide association analyses of risk tolerance and risky behaviors in over 1 million individuals identify hundreds of loci and shared genetic influences	-0.1159	0.0235	-4.9396	7.8277e-07	-0.0059	0.0066	-0.115	0.0211	-5.4369	5.4203e-08	-0.0078	0.0075	-0.1203	0.0214	-5.6145	1.9717e-08	-0.0088	0.0078	-0.0844	0.0201	-4.2039	2.6231e-05	0.016879	0.009	-0.0457	0.0208	-2.2016	0.027694	0.039499	0.009	-0.079	0.0209	-3.7809	0.00015627	0.018536	0.0086	-0.0829	0.0211	-3.9277	8.5776e-05	0.0175	0.0088	-0.0725	0.0204	-3.5483	0.00038774	0.0208	0.0087
Sleep Duration	Jansen, P.R., Watanabe, K., Stringer, S. et al. Genome-wide analysis of insomnia in 1,331,010 individuals identifies new risk loci and functional pathways. Nat Genet 51, 394–403 (2019). https://doi.org/10.1038/s41588-018-0333-3	-0.0326	0.0229	-1.4215	0.15517	0.0046	0.0066	-0.0396	0.0204	-1.9431	0.052005	0.0055	0.0073	-0.0383	0.0204	-1.8797	0.060155	0.0067	0.0076	0.0513	0.0186	2.7516	0.0059302	0.021433	0.0077	0.0507	0.0186	2.7232	0.006466	0.014762	0.0072	-0.0004	0.019	-0.0229	0.98174	0.010237	0.0072	0.0004	0.019	0.0213	0.98299	0.0101	0.0074	0.0065	0.0193	0.3361	0.73681	0.0125	0.0075
Total Cholesterol	Teslovich, T. M. et al. Biological, clinical and population relevance of 95 loci for blood lipids. Nature 466, 707-713 (2010).	-0.0172	0.0234	-0.7349	0.46239	-0.0031	0.0063	-0.0214	0.0209	-1.024	0.30585	-0.0072	0.0067	-0.0265	0.0201	-1.3208	0.18656	-0.0055	0.0067	-0.0582	0.0209	-2.7923	0.0052341	-0.0057943	0.0074	-0.0413	0.0204	-2.0265	0.042709	-0.0059055	0.007	-0.0288	0.0202	-1.4273	0.1535	-0.0064185	0.007	-0.0325	0.0197	-1.6469	0.099579	-0.0053	0.0071	-0.038	0.0198	-1.9226	0.054533	-0.0051	0.0071
Triglycerides	Teslovich, T. M. et al. Biological, clinical and population relevance of 95 loci for blood lipids. Nature 466, 707-713 (2010).	-0.045	0.0274	-1.6423	0.10054	-0.0037	0.0069	-0.0426	0.0223	-1.9116	0.055926	-0.0082	0.0071	-0.0462	0.0217	-2.1308	0.033104	-0.0078	0.0073	-0.1057	0.0232	-4.5506	5.3488e-06	-0.004387	0.0085	-0.0964	0.023	-4.1856	2.8436e-05	-0.0049358	0.0083	-0.0709	0.022	-3.22	0.001282	-0.0055445	0.0076	-0.0729	0.0217	-3.3623	0.00077289	-0.0054	0.0078	-0.0757	0.0221	-3.4255	0.00061365	-0.0072	0.008
Ulcerative Colitis	de Lange KM, Moutsianas L, Lee JC, et al. Genome-wide association study implicates immune activation of multiple integrin genes in inflammatory bowel disease. Nat Genet. 2017;49(2):256-261. doi:10.1038/ng.3760	0.0809	0.0334	2.4203	0.01551	0.0014	0.0066	0.0705	0.0293	2.4054	0.016153	0.0009	0.0072	0.0616	0.0291	2.1189	0.034103	0.0049	0.0074	0.072	0.0312	2.3069	0.021062	0.009162	0.0081	0.0705	0.0323	2.1832	0.029019	0.0093248	0.008	0.058	0.0306	1.8967	0.057865	0.0057526	0.0076	0.0522	0.0303	1.7225	0.084972	0.0084	0.0077	0.0632	0.0305	2.0727	0.0382	0.0085	0.0079
Vitamin D levels	Revez, J.A. et al. Genome-wide association study identifies 143 loci associated with 25 hydroxyvitamin D concentration. Nature Communications (2020).	-0.1816	0.0278	-6.5316	6.5092e-11	-0.0146	0.0071	-0.1716	0.0258	-6.6566	2.8018e-11	-0.0286	0.0078	-0.1794	0.0259	-6.9356	4.0448e-12	-0.0286	0.0076	-0.1668	0.0242	-6.9036	5.0716e-12	-0.028508	0.0089	-0.1784	0.0242	-7.3807	1.5744e-13	-0.026054	0.0088	-0.1839	0.0249	-7.3749	1.6444e-13	-0.033923	0.0081	-0.1898	0.025	-7.5919	3.1516e-14	-0.034	0.0081	-0.1793	0.0246	-7.2736	3.5005e-13	-0.0322	0.0087
Waist circumference	Shungin, D. et al. New genetic loci link adipose and insulin biology to body fat distribution. Nature 518, 187 (2015)	-0.0955	0.023	-4.1482	3.3505e-05	-0.0064	0.0065	-0.0951	0.0197	-4.8195	1.439e-06	-0.0076	0.0066	-0.0941	0.0196	-4.7972	1.609e-06	-0.0076	0.0066	-0.1003	0.0204	-4.9086	9.1718e-07	-0.0092499	0.0073	-0.1633	0.0197	-8.2872	1.1595e-16	-0.010121	0.0071	-0.1275	0.0194	-6.5791	4.7315e-11	-0.010769	0.007	-0.1266	0.0195	-6.4906	8.551e-11	-0.0109	0.0072	-0.131	0.0188	-6.9525	3.5885e-12	-0.0107	0.0071
Waist-Hip ratio	Shungin, D. et al. New genetic loci link adipose and insulin biology to body fat distribution. Nature 518, 187 (2015)	-0.1675	0.0249	-6.7365	1.622e-11	-0.0009	0.006	-0.1673	0.0202	-8.2641	1.4071e-16	-0.0051	0.0062	-0.166	0.0201	-8.2691	1.3502e-16	-0.0062	0.0061	-0.2289	0.0207	-11.0777	1.6091e-28	-0.0085032	0.0067	-0.2303	0.0197	-11.6716	1.7806e-31	-0.011509	0.0067	-0.2032	0.019	-10.6853	1.1924e-26	-0.0086062	0.0066	-0.2022	0.0192	-10.5335	6.0522e-26	-0.0097	0.0066	-0.2086	0.0193	-10.7938	3.682e-27	-0.0085	0.007
[truncated: 6 more columns]

## Sheet: Supp. Table 4
Supplementary Table 4. UKB imputation variable overview
Overview of UKB variables used for imputation in this study. Per variable the phenotypic correlation with FIS1 is shown, along with the genetic correlation with NonCogIFIS and Savage et al. Intelligence. The final selection of imputation variables covers a subset of all variables listed. Inclusion is shown in the last column.
Label*	UKB variable	Phenotype description	rg NonCogIFIS	rg Intelligence**	rpheno FIS1	Included in final selection
1	100002	Energy	0.3964	0.3558	0.0560766	No
2	100011	Iron	0.4848	0.5272	0.0764141	Yes
3	100016	Potassium	0.4552	0.351	0.0572287	No
4	100017	Magnesium	0.5372	0.3982	0.0682886	No
5	1050	Time spend outdoors in summer	-0.3345	-0.6456	-0.166853	Yes
6	1060	Time spent outdoors in winter	-0.2749	-0.6003	-0.131088	Yes
7	1070	Time spent watching television (TV)	-0.4493	-0.4497	-0.141424	Yes
8	1080	Time spent using computer	0.2758	0.5393	0.203803	Yes
9	1100	Drive faster than motorway speed limit	0.2111	0.3604	0.123159	Yes
10	110001	Invitation to complete online 24-hour recall dietary questionnaire, acceptance	0.2336	0.6268	0.13787	Yes
11	1180	Morning/evening person (chronotype)	0.1009	0.1597	0.0560276	Yes
12	1190	Nap during day	-0.0405	-0.1395	-0.0596474	Yes
13	1239	Current tobacco smoking	-0.485	-0.294	-0.0716195	No
14	1269	Exposure to tobacco smoke at home	-0.3979	-0.4591	-0.0627483	Yes
15	1279	Exposure to tobacco smoke outside home	-0.4304	-0.3305	-0.0872927	No
16	1319	Dried fruit intake	0.4614	0.2735	0.0596496	No
17	137	Number of treatments/medications taken	-0.27	-0.2755	-0.07105	Yes
18	1408	Cheese intake	0.3603	0.536	0.138107	Yes
19	1478	Salt added to food	-0.2334	-0.2147	-0.0676968	No
20	1488	Tea intake	0.0492	-0.1625	-0.0578969	Yes
21	1498	Coffee intake	0.1481	0.2316	0.0601313	Yes
22	1558	Alcohol intake frequency.	-0.3768	-0.3202	-0.121953	No
23	1568	Average weekly red wine intake	0.497	0.4478	0.126215	No
24	1578	Average weekly champagne plus white wine intake	0.3687	0.4556	0.0983463	Yes
25	1588	Average weekly beer plus cider intake	-0.2236	-0.3442	-0.0763881	Yes
26	1618	Alcohol usually taken with meals	0.5195	0.3823	0.126517	No
27	1628	Alcohol intake versus 10 years previously	-0.351	-0.3111	-0.0640731	No
28	1677	Breastfed as a baby	0.2965	0.3462	0.0594828	Yes
29	1787	Maternal smoking around birth	-0.4218	-0.3144	-0.0596764	No
30	1807	Father's age at death	0.4931	0.3555	0.0537049	No
31	1873	Number of full brothers	-0.3367	-0.1734	-0.0913948	No
32	1883	Number of full sisters	-0.3859	-0.1031	-0.0832037	No
33	189	Townsend deprivation index at recruitment	-0.5448	-0.239	-0.088078	No
34	1920	Mood swings	-0.2116	-0.3401	-0.0886703	Yes
35	1950	Sensitivity / hurt feelings	-0.1391	-0.1944	-0.0504563	Yes
36	1960	Fed-up feelings	-0.3015	-0.2718	-0.0813793	No
37	1970	Nervous feelings	0.0483	-0.1295	-0.0593332	Yes
38	1990	Tense / 'highly strung'	-0.0053	-0.2158	-0.0607734	Yes
39	20015	Sitting height	0.41	0.1551	0.108982	No
40	20018	Prospective memory result	-0.0269	-0.7686	-0.256551	Yes
41	20022	Birth weight	0.2287	0.1159	0.0572732	No
42	20023	Mean time to correctly identify matches	-0.0668	-0.1912	-0.129653	Yes
43	20075	Home location at assessment - north co-ordinate (rounded)	-0.3518	-0.4329	-0.0584991	Yes
44	20077	Number of diet questionnaires completed	0.2628	0.6084	0.174178	Yes
45	20127	Neuroticism score	-0.1163	-0.1728	-0.0650465	Yes
46	20150	Forced expiratory volume in 1-second (FEV1), Best measure	0.4417	0.1939	0.105765	No
47	20151	Forced vital capacity (FVC), Best measure	0.4503	0.1921	0.11051	No
48	20153	Forced expiratory volume in 1-second (FEV1), predicted	0.4455	0.1602	0.119052	No
49	20154	Forced expiratory volume in 1-second (FEV1), predicted percentage	0.216	0.1196	0.0684126	No
50	2020	Loneliness, isolation	-0.2589	-0.2025	-0.0652685	No
51	20414	Frequency of drinking alcohol	0.2752	0.2887	0.105813	Yes
52	20453	Ever taken cannabis	0.0388	0.3141	0.0711573	Yes
53	20488	Physically abused by family as a child	-0.2622	-0.18	-0.0569781	No
54	20489	Felt loved as a child	0.2178	0.1281	0.0590381	No
55	20491	Someone to take to doctor when needed as a child	0.28	0.6289	0.136808	Yes
56	20497	Repeated disturbing thoughts of stressful experience in past month	-0.187	-0.2663	-0.0518566	Yes
57	20498	Felt very upset when reminded of stressful experience in past month	-0.1559	-0.2743	-0.0637695	Yes
58	2050	Frequency of depressed mood in last 2 weeks	-0.211	-0.2322	-0.0718451	Yes
59	20505	Recent easy annoyance or irritability	-0.217	-0.2557	-0.056793	Yes
60	20509	Recent inability to stop or control worrying	-0.1711	-0.2678	-0.0632502	Yes
61	20512	Recent feelings of foreboding	-0.1417	-0.2761	-0.0508264	Yes
62	20520	Recent worrying too much about different things	-0.091	-0.2661	-0.0642655	Yes
63	20522	Been in a confiding relationship as an adult	0.2252	0.3801	0.125505	Yes
64	2060	Frequency of unenthusiasm / disinterest in last 2 weeks	-0.2862	-0.3546	-0.0904461	Yes
65	2070	Frequency of tenseness / restlessness in last 2 weeks	-0.14	-0.2585	-0.0707446	Yes
66	2080	Frequency of tiredness / lethargy in last 2 weeks	-0.2954	-0.178	-0.0601745	No
67	21001	Body mass index (BMI)	-0.2162	-0.1959	-0.0513574	No
68	2129	Answered sexual history questions	-0.1016	-0.4408	-0.0998452	Yes
69	2139	Age first had sexual intercourse	0.5139	0.479	0.143742	No
70	2178	Overall health rating	-0.348	-0.3804	-0.121451	Yes
71	2188	Long-standing illness, disability or infirmity	-0.3006	-0.1408	-0.0503391	No
72	2217	Age started wearing glasses or contact lenses	-0.1517	-0.4034	-0.109575	Yes
73	2237	Plays computer games	-0.2184	0.2127	0.0595596	No
74	22504	Bring up phlegm/sputum/mucus on most days	-0.2647	-0.1607	-0.0517212	No
75	23099	Body fat percentage	-0.2458	-0.2037	-0.0506551	No
76	23104	Body mass index (BMI)	-0.2244	-0.19	-0.0512988	No
77	23111	Leg fat percentage (right)	-0.3324	-0.2569	-0.0758784	No
78	23115	Leg fat percentage (left)	-0.3341	-0.26	-0.0756391	No
79	23129	Trunk fat-free mass	0.3188	0.0454	0.0536208	No
80	23130	Trunk predicted mass	0.3189	0.0461	0.0530379	No
81	2316	Wheeze or whistling in the chest in last year	-0.339	-0.2845	-0.0661565	No
82	2492	Taking other prescription medications	-0.2559	-0.23	-0.060544	No
83	2644	Light smokers, at least 100 smokes in lifetime	-0.1562	-0.3245	-0.0840847	Yes
84	2744	Birth weight of first child	0.2345	0.1696	0.0616015	No
85	2754	Age at first live birth	0.6525	0.5167	0.208831	No
86	2764	Age at last live birth	0.6218	0.4969	0.147411	No
87	2867	Age started smoking in former smokers	0.5413	0.4924	0.131554	No
88	30000	White blood cell (leukocyte) count	-0.2478	-0.1777	-0.061281	No
89	30140	Neutrophill count	-0.2352	-0.1654	-0.0609148	No
90	30530	Sodium in urine	-0.267	-0.3064	-0.0578575	Yes
91	3062	Forced vital capacity (FVC)	0.443	0.1866	0.115632	No
92	3063	Forced expiratory volume in 1-second (FEV1)	0.4411	0.19	0.11557	No
93	3064	Peak expiratory flow (PEF)	0.3539	0.1992	0.109655	No
94	3526	Mother's age at death	0.5608	0.4353	0.0660929	No
95	3536	Age started hormone-replacement therapy (HRT)	0.3213	0.3516	0.0643763	Yes
96	3581	Age at menopause (last menstrual period)	0.1317	0.1671	0.0681663	Yes
97	3591	Ever had hysterectomy (womb removed)	-0.2414	-0.3246	-0.0567964	Yes
98	3606	Chest pain or discomfort walking normally	-0.3901	-0.5276	-0.144104	Yes
99	3761	Age hay fever, rhinitis or eczema diagnosed	-0.177	-0.1354	-0.0586431	No
100	399	Number of incorrect matches in round	0.1676	-0.5057	-0.192341	Yes
101	400	Time to complete round	0.1951	-0.4967	-0.22642	Yes
102	404	Duration to first press of snap-button in each round	-0.0801	-0.2395	-0.148968	Yes
103	41235	Spells in hospital	-0.2264	-0.2921	-0.0768103	Yes
104	4260	Round of numeric memory test	-0.1745	0.7227	0.270705	Yes
105	4270	Volume level set by participant (left)	-0.1093	-0.4477	-0.0806629	Yes
106	4282	Maximum digits remembered correctly	-0.1847	0.6728	0.327073	Yes
107	4283	Number of rounds of numeric memory test performed	-0.1369	0.7211	0.271233	Yes
108	4288	Time to answer	0.2079	-0.5107	-0.161705	Yes
109	4290	Duration screen displayed	0.021	-0.7715	-0.369493	Yes
110	4291	Number of attempts	0.0011	-0.7382	-0.244227	Yes
111	4548	Health satisfaction	-0.2195	-0.2519	-0.0577296	Yes
112	4581	Financial situation satisfaction	-0.3191	-0.306	-0.0804897	No
113	46	Hand grip strength (left)	0.3211	0.035	0.0531715	No
114	4653	Ever highly irritable/argumentative for 2 days	-0.3005	-0.3134	-0.070177	Yes
115	4674	Private healthcare	-0.2668	-0.2359	-0.0679839	No
116	47	Hand grip strength (right)	0.3258	0.0867	0.0729321	No
117	4717	Shortness of breath walking on level ground	-0.3671	-0.3494	-0.0878569	No
118	4728	Leg pain on walking	-0.3188	-0.3678	-0.0901485	Yes
119	4825	Noisy workplace	-0.406	-0.6733	-0.178627	Yes
120	50	Standing height	0.4605	0.1627	0.124005	No
121	5084	Spherical power (right)	0.0644	-0.1298	-0.137014	Yes
122	5085	Spherical power (left)	-0.0299	-0.1063	-0.135834	Yes
123	5096	3mm weak meridian (left)	-0.1629	-0.0621	-0.0608542	No
124	5097	6mm weak meridian (left)	-0.1413	-0.0681	-0.059723	No
125	5098	6mm weak meridian (right)	-0.1538	-0.0636	-0.0587135	No
126	5099	3mm weak meridian (right)	-0.166	-0.0567	-0.0615039	No
127	5132	3mm strong meridian (right)	-0.1438	-0.0513	-0.058224	No
128	5133	6mm strong meridian (right)	-0.1406	-0.0641	-0.0551591	No
129	5134	6mm strong meridian (left)	-0.123	-0.0604	-0.054432	No
130	5135	3mm strong meridian (left)	-0.1436	-0.0527	-0.0558357	No
131	5201	logMAR, final (right)	-0.0364	-0.3445	-0.0772625	Yes
132	5984	ECG, load	0.5905	0.2744	0.0911787	No
133	5993	ECG, number of stages in a phase	0.6756	0.3566	0.0876841	No
134	6032	Maximum workload during fitness test	0.5565	0.2602	0.094506	No
135	738	Average total household income before tax	0.4942	0.6238	0.249398	Yes
136	777	Frequency of travelling from home to job workplace	-0.4517	-0.5478	-0.0657864	Yes
137	806	Job involves mainly walking or standing	-0.3193	-0.8221	-0.272442	Yes
138	816	Job involves heavy manual or physical work	-0.3801	-0.7967	-0.286283	Yes
139	826	Job involves shift work	-0.3926	-0.6696	-0.135427	Yes
140	845	Age completed full time education	0.4802	0.7396	0.317652	Yes
141	864	Number of days/week walked 10+ minutes	-0.063	-0.3005	-0.0642482	Yes
142	874	Duration of walks	-0.3333	-0.4254	-0.0903763	Yes
143	884	Number of days/week of moderate physical activity 10+ minutes	-0.0085	-0.4203	-0.0972381	Yes
144	894	Duration of moderate activity	-0.1508	-0.6166	-0.113254	Yes
145	904	Number of days/week of vigorous physical activity 10+ minutes	0.0675	-0.3504	-0.0789092	Yes
146	914	Duration of vigorous activity	-0.2493	-0.402	-0.0651572	Yes
147	924	Usual walking pace	0.388	0.355	0.111076	No
148	943	Frequency of stair climbing in last 4 weeks	0.3494	0.1336	0.0521156	No
149	971	Frequency of walking for pleasure in last 4 weeks	-0.2277	-0.4466	-0.0816926	Yes
150	6146 (derived)	Receives disability benefits	-0.4163	-0.4482		Yes
151	6138 (derived)	Completed College or University degree	0.5584	0.7026		Yes
152	6138 (derived)	Completed any degree	0.5158	0.7985		Yes
153	680 (derived)	Rents house - from local authority, local council, housing association	-0.7089	-0.4607	-0.131309	No
154	680 (derived)	Owns house, or someone in household does	0.5398	0.2579	0.05828	No
*Labels correspond to labels in Supplementary Figure 6.
**Savage, J. E. et al. Genome-wide association meta-analysis in 269,867 individuals identifies new genetic and functional links to intelligence. Nat. Genet. 50, 912–919 (2018).

## Sheet: Supp. Table 5
Supplementary Table 5. Imputation accuracies
Accuracy for the different imputation runs, and number of individuals used to assess this. Accuracy is computed as correlation between observed and imputed values for N individuals set to missing prior to imputation. Note that N differs per imputation run due to differing numbers of individuals amongst our static evaluation set of 50,000 randomly-chosen individuals having a measured value.
Imputation	N individuals	Accuracy	SE
ImpFIS-vA	16085	0.52	0.006
ImpFIS-vB	16085	0.49	0.006
ImpFIS-all5	16085	0.54	0.006
ImpFIS-all5 never measured	8008	0.48	0.009
ImpFIS-all5 ever-measured	8077	0.58	0.008
ImpFIS-average	31127	0.46	0.004
ImpFIS-earliest	31127	0.44	0.005

## Sheet: Supp. Table 6
Supplementary Table 6. Combining imputed and observed measures
Common variant based comparison of combining imputed and observed measures. The top shows statistics of combining GWAS sumstats via meta analysis using METAL. The bottom shows statistics of combining via mega-analysis after first scaling imputed and measured values separately. Mega-analysis shows both higher SNP heritability and more identified lead SNPs using FUMA. Note that the sample sizes dif…
Analysis	GWAS	Sample size	N removed outliers	SNP h2	SNP h2 SE	N Identified lead SNPs
Meta	All 5	455640	25	0.15	0.004	399
	earliest	455640	25	0.1	0.003	151
	average	455636	29	0.1	0.003	161
Mega	All 5	455640	25	0.18	0.005	488
	earliest	455640	25	0.16	0.005	570
	average	455636	29	0.16	0.005	608

## Sheet: Supp. Table 7
Supplementary Table 7. Measured and imputed subset comparison
Here we compare downstream GWAS analyses of imputed and measured individuals separately within each imputation approach. ImpFIS-average and ImpFIS-earliest perform very similarly across all metrics. Although at first glance ImpFIS-all5 appears to achieve the best imputed set, splitting this up (Supplementary Figure 5) shows the results are inflated by measured individuals
Imputation approach	Subset	h2 (SE)	rg with Height (SE)	rg with NonCogEA (SE)	rg with Intelligence Savage (SE)	rg with Cogent Intelligence (SE)
ImpFIS-average	measured	0.21 (.01)	0.10 (.02)	0.00 (.02)	0.97 (.00)	0.91 (.05)
	imputed	0.16 (.01)	0.13 (.02)	0.56 (.02)	0.80 (.02)	0.86 (.06)
ImpFIS-earliest	measured	0.20 (.01)	0.10 (.02)	0.00 (.02)	0.97 (.00)	0.92 (.05)
	imputed	0.16 (.01)	0.13 (.02)	0.56 (.02)	0.80 (.02)	0.86 (.06)
ImpFIS-all5	measured	0.23 (.01)	0.10 (.02)	0.02 (.02)	0.96 (.01)	0.91 (.06)
	imputed	0.17 (.01)	0.12 (.02)	0.30 (.02)	0.94 (.01)	0.94 (.05)
	imputed never-measured	0.14 (.01)	0.12 (.02)	0.56 (.02)	0.80 (.02)	0.84 (.06)
	imputed ever-measured	0.23 (.01)	0.12 (.02)	0.15 (.02)	0.98 (.01)	0.94 (.06)

## Sheet: Supp Table 8
Supplementary Table 8. MAGMA prioritized genes across GWASs
MAGMA results produced by the SNP2GENE tool in FUMA. The type column indicates the GWAS used as input. Per GWAS only FDR<1% significant protein-coding genes are shown.
GENE	CHR	START	STOP	NSNPS	NPARAM	N	ZSTAT	P	SYMBOL	FDR	type
ENSG00000269831	1	738532	739137	1	1	146097	-0.46068	0.67749	AL669831.1	0.806213	FIS1
ENSG00000269308	1	818043	819983	4	2	146112	-0.54667	0.7077	AL645608.2	0.824074	FIS1
ENSG00000187634	1	860260	879955	82	19	146064	0.45458	0.32471	SAMD11	0.569916	FIS1
ENSG00000268179	1	861264	866445	26	7	146247	0.26985	0.39364	AL645608.1	0.622493	FIS1
ENSG00000188976	1	879584	894689	66	14	145969	1.101	0.13545	NOC2L	0.372214	FIS1
ENSG00000187961	1	895967	901095	23	6	145627	0.82654	0.20425	KLHL17	0.455466	FIS1
ENSG00000187583	1	901877	911245	40	20	144989	0.040831	0.48372	PLEKHN1	0.684342	FIS1
ENSG00000187642	1	910579	917497	33	10	145512	0.96533	0.16719	C1orf170	0.414319	FIS1
ENSG00000188290	1	934342	935552	4	2	144053	1.6102	0.05368	HES4	0.229748	FIS1
ENSG00000187608	1	948803	949920	7	3	145783	2.4102	0.0079727	ISG15	0.0759718	FIS1
ENSG00000188157	1	955503	991496	179	31	145689	0.26702	0.39473	AGRN	0.623361	FIS1
ENSG00000237330	1	1006346	1009687	14	6	145312	0.3148	0.37646	RNF223	0.610258	FIS1
ENSG00000131591	1	1017198	1051741	132	20	145559	-1.1117	0.86688	C1orf159	0.917083	FIS1
ENSG00000162571	1	1109264	1133315	154	23	145535	2.4337	0.0074721	TTLL10	0.0730434	FIS1
ENSG00000186891	1	1138888	1142071	13	4	145405	-0.31921	0.62522	TNFRSF18	0.774039	FIS1
ENSG00000186827	1	1146706	1149518	10	4	145403	1.2292	0.1095	TNFRSF4	0.334429	FIS1
ENSG00000078808	1	1152288	1167411	113	9	145666	0.68897	0.24542	SDF4	0.498223	FIS1
ENSG00000176022	1	1167629	1170421	11	4	146105	-0.41013	0.65914	B3GALT6	0.795212	FIS1
ENSG00000184163	1	1177826	1182102	16	5	145589	0.21504	0.41487	FAM132A	0.636779	FIS1
ENSG00000160087	1	1189289	1209265	72	15	145522	-0.30503	0.61983	UBE2J2	0.772388	FIS1
ENSG00000162572	1	1215816	1227409	50	18	145464	1.5277	0.063288	SCNN1D	0.251626	FIS1
ENSG00000131584	1	1227756	1244989	60	15	145773	0.18502	0.42661	ACAP3	0.645517	FIS1
ENSG00000169972	1	1243947	1247057	6	4	145445	-0.63044	0.7358	PUSL1	0.841214	FIS1
ENSG00000127054	1	1246965	1260071	32	12	145260	0.25343	0.39997	CPSF3L	0.627051	FIS1
ENSG00000224051	1	1260136	1264277	18	6	145898	-0.12576	0.55004	GLTPD1	0.728581	FIS1
ENSG00000169962	1	1266694	1270686	20	9	145859	0.38897	0.34865	TAS1R3	0.589465	FIS1
ENSG00000107404	1	1270656	1284730	44	11	145521	0.34603	0.36466	DVL1	0.600536	FIS1
ENSG00000162576	1	1288069	1297157	39	10	145743	-0.35948	0.64038	MXRA8	0.782908	FIS1
ENSG00000175756	1	1309110	1310875	12	4	145297	0.67274	0.25056	AURKAIP1	0.50295	FIS1
ENSG00000221978	1	1321091	1334708	34	16	145603	0.65792	0.2553	CCNL2	0.507538	FIS1
ENSG00000224870	1	1334902	1337426	11	4	145919	-0.048075	0.51917	RP4-758J18.2	0.707809	FIS1
ENSG00000242485	1	1337288	1342693	18	7	146168	0.5522	0.29041	MRPL20	0.540117	FIS1
ENSG00000235098	1	1353800	1357149	11	5	144583	-0.69004	0.75492	ANKRD65	0.853066	FIS1
ENSG00000205116	1	1361508	1363167	6	2	143170	0.54897	0.29151	TMEM88B	0.541098	FIS1
ENSG00000179403	1	1370241	1378262	22	8	143427	-0.30923	0.62143	VWA1	0.772875	FIS1
ENSG00000215915	1	1385069	1405538	60	15	145252	-0.47574	0.68287	ATAD3C	0.809861	FIS1
ENSG00000160072	1	1407143	1433228	88	11	145530	-0.21496	0.5851	ATAD3B	0.750224	FIS1
ENSG00000197785	1	1447531	1470067	84	19	145315	0.56395	0.2864	ATAD3A	0.535929	FIS1
ENSG00000205090	1	1470554	1475833	8	3	144326	0.89911	0.1843	TMEM240	0.434898	FIS1
ENSG00000160075	1	1477053	1510249	108	15	145465	0.83142	0.20287	SSU72	0.454037	FIS1
ENSG00000215014	1	1510355	1511373	3	1	145091	0.899	0.18433	AL645728.1	0.434898	FIS1
ENSG00000228594	1	1533392	1535476	3	2	145178	-0.38492	0.64985	C1orf233	0.789226	FIS1
ENSG00000197530	1	1550795	1565990	29	9	144410	1.5065	0.065975	MIB2	0.256263	FIS1
ENSG00000248333	1	1570603	1590473	17	3	145609	4.368	6.2684e-06	CDK11B	0.00048744	FIS1
ENSG00000189339	1	1592939	1624167	51	17	144321	2.543	0.0054952	SLC35E2B	0.0613986	FIS1
ENSG00000008128	1	1634169	1655766	26	5	142333	-0.35033	0.63695	CDK11A	0.781444	FIS1
ENSG00000215790	1	1656277	1677431	33	10	143536	-0.72652	0.76624	SLC35E2	0.859285	FIS1
ENSG00000008130	1	1682671	1711896	99	19	145617	0.91034	0.18132	NADK	0.431786	FIS1
ENSG00000078369	1	1716729	1822495	256	38	145467	1.1974	0.11558	GNB1	0.344836	FIS1
ENSG00000169885	1	1846266	1848735	13	4	146104	-0.30458	0.61966	CALML6	0.772329	FIS1
ENSG00000178821	1	1849029	1850712	7	3	145974	-0.5784	0.7185	TMEM52	0.830825	FIS1
ENSG00000142609	1	1853396	1935276	352	35	144395	0.029218	0.48835	C1orf222	0.686955	FIS1
ENSG00000187730	1	1950780	1962192	40	14	145013	-0.11712	0.54662	GABRD	0.726076	FIS1
ENSG00000067606	1	1981909	2116834	570	48	145683	-0.27246	0.60737	PRKCZ	0.764156	FIS1
ENSG00000162585	1	2115903	2144159	76	22	145439	-0.37906	0.64768	C1orf86	0.787806	FIS1
ENSG00000269554	1	2121237	2123179	4	2	145194	-1.2264	0.88999	AL590822.2	0.931136	FIS1
ENSG00000203301	1	2143360	2145620	7	4	144144	-0.515	0.69672	AL590822.1	0.818122	FIS1
ENSG00000157933	1	2160134	2241558	324	65	145479	0.91806	0.17929	SKI	0.428844	FIS1
ENSG00000116151	1	2252692	2323146	386	57	145442	1.1716	0.12068	MORN1	0.352126	FIS1
ENSG00000269753	1	2258581	2259042	1	1	146442	0.091111	0.4637	AL589739.1	0.670037	FIS1
ENSG00000157916	1	2323267	2336883	51	19	145847	-1.0846	0.86096	RER1	0.913972	FIS1
ENSG00000157911	1	2336236	2345236	40	16	145368	0.11725	0.45333	PEX10	0.662785	FIS1
ENSG00000149527	1	2357419	2436969	397	67	145228	2.1651	0.01519	PLCH2	0.11357	FIS1
ENSG00000157881	1	2439972	2458039	91	22	146130	-0.24555	0.59699	PANK4	0.757401	FIS1
ENSG00000197921	1	2460184	2461684	6	4	145599	1.3014	0.096564	HES5	0.314419	FIS1
ENSG00000157873	1	2487078	2496821	35	11	145909	0.23618	0.40665	TNFRSF14	0.631653	FIS1
ENSG00000157870	1	2517930	2522908	23	13	145912	0.25192	0.40055	FAM213B	0.627387	FIS1
ENSG00000142606	1	2522078	2564481	208	20	146042	0.5152	0.30321	MMEL1	0.551439	FIS1
ENSG00000215912	1	2567415	2718286	173	26	146036	-0.20272	0.58032	TTC34	0.747608	FIS1
ENSG00000169717	1	2938046	2939465	6	3	146342	0.084846	0.46619	ACTRT2	0.671837	FIS1
ENSG00000142611	1	2985732	3355185	1875	221	145303	0.37791	0.35275	PRDM16	0.592196	FIS1
ENSG00000130762	1	3370990	3397677	124	20	145704	-0.43821	0.66938	ARHGEF16	0.802113	FIS1
ENSG00000162591	1	3406484	3528059	577	88	145287	0.56232	0.28695	MEGF6	0.536614	FIS1
ENSG00000158109	1	3541566	3546691	15	6	145681	-0.81123	0.79138	TPRG1L	0.873017	FIS1
ENSG00000116213	1	3547331	3569325	61	21	145963	-1.4949	0.93254	WRAP73	0.956719	FIS1
ENSG00000078900	1	3569084	3652765	365	66	144993	1.2315	0.10907	TP73	0.333848	FIS1
ENSG00000162592	1	3668962	3688209	87	23	145334	1.3127	0.094639	CCDC27	0.311606	FIS1
ENSG00000235169	1	3689352	3692546	15	7	144339	1.227	0.10991	SMIM1	0.334869	FIS1
ENSG00000130764	1	3696784	3713068	99	21	145566	2.0083	0.022306	LRRC47	0.140968	FIS1
ENSG00000116198	1	3728645	3773778	330	23	146062	1.5474	0.060881	CEP104	0.246392	FIS1
ENSG00000169598	1	3773845	3801993	175	26	145303	-0.17957	0.57125	DFFB	0.74137	FIS1
ENSG00000198912	1	3805689	3816857	55	12	146018	-0.97903	0.83622	C1orf174	0.9002	FIS1
ENSG00000196581	1	4714792	4852594	821	100	145466	2.1312	0.016535	AJAP1	0.118395	FIS1
ENSG00000131697	1	5922871	6052533	571	34	146110	1.0189	0.15412	NPHP4	0.396656	FIS1
ENSG00000069424	1	6051526	6161253	418	78	145270	0.46175	0.32213	KCNAB2	0.567496	FIS1
ENSG00000268332	1	6100630	6101399	5	3	146078	-0.45111	0.67405	AL035406.1	0.804411	FIS1
ENSG00000116254	1	6161853	6240183	348	45	145429	0.74755	0.22737	CHD5	0.478492	FIS1
ENSG00000116251	1	6241329	6269449	83	19	145183	1.7171	0.042976	RPL22	0.202994	FIS1
ENSG00000158286	1	6265535	6281359	51	10	145924	-1.2582	0.89584	RNF207	0.933999	FIS1
ENSG00000116237	1	6281253	6296032	48	10	145885	-1.0331	0.84923	ICMT	0.907331	FIS1
ENSG00000173673	1	6304252	6305638	7	3	144025	0.81898	0.2064	HES3	0.458085	FIS1
ENSG00000158292	1	6307406	6321035	48	6	145364	0.19418	0.42302	GPR153	0.642336	FIS1
ENSG00000097021	1	6324329	6454451	594	36	145798	1.2292	0.1095	ACOT7	0.334429	FIS1
ENSG00000069812	1	6472478	6484730	49	12	145738	1.8258	0.03394	HES2	0.179156	FIS1
ENSG00000187017	1	6484848	6521430	136	20	145615	1.3051	0.095922	ESPN	0.313595	FIS1
ENSG00000215788	1	6521211	6526255	21	10	145467	0.91473	0.18017	TNFRSF25	0.430295	FIS1
ENSG00000171680	1	6526152	6580121	206	45	145716	-0.6239	0.73365	PLEKHG5	0.83993	FIS1
ENSG00000162408	1	6581407	6614595	149	10	146099	0.048087	0.48082	NOL9	0.681947	FIS1
ENSG00000173662	1	6615241	6639817	79	18	145810	-0.23881	0.59437	TAS1R1	0.755598	FIS1
ENSG00000204859	1	6640061	6649340	21	12	146102	0.029849	0.48809	ZBTB48	0.686784	FIS1
ENSG00000162413	1	6650784	6674667	85	27	146088	-0.152	0.56041	KLHL21	0.734147	FIS1
ENSG00000116273	1	6673745	6684093	27	8	146092	-0.12229	0.54866	PHF13	0.727287	FIS1
ENSG00000041988	1	6684926	6695646	43	11	146097	1.1003	0.13561	THAP3	0.372214	FIS1
ENSG00000007923	1	6694228	6761984	209	34	145944	0.76799	0.22125	DNAJC11	0.472453	FIS1
ENSG00000171735	1	6845384	7829766	3566	278	145302	3.1942	0.00070111	CAMTA1	0.0150206	FIS1
ENSG00000049245	1	7831329	7841492	44	13	145986	0.57831	0.28153	VAMP3	0.531607	FIS1
ENSG00000049246	1	7844380	7905237	272	28	145922	0.40574	0.34247	PER3	0.58548	FIS1
ENSG00000049247	1	7903143	7913572	46	16	145282	0.17253	0.43151	UTS2	0.64812	FIS1
ENSG00000049249	1	7979907	8000926	61	12	145785	1.3374	0.090545	TNFRSF9	0.305129	FIS1
ENSG00000116288	1	8014351	8045565	95	22	145601	-0.023409	0.50934	PARK7	0.701144	FIS1
ENSG00000116285	1	8064464	8086368	50	14	145987	0.54432	0.29311	ERRFI1	0.542241	FIS1
ENSG00000162426	1	8377886	8404227	99	19	145339	1.3561	0.087539	SLC45A1	0.299819	FIS1
ENSG00000142599	1	8412457	8877702	1005	41	145810	1.2422	0.10709	RERE	0.330572	FIS1
ENSG00000074800	1	8921061	8939308	40	11	145808	-1.8839	0.97021	ENO1	0.97996	FIS1
ENSG00000131686	1	9005926	9035151	152	35	145636	-0.02277	0.50908	CA6	0.701023	FIS1
ENSG00000197241	1	9063359	9086404	98	33	145142	-0.10288	0.54097	SLC2A7	0.722608	FIS1
ENSG00000142583	1	9095166	9148537	228	38	145182	-0.036671	0.51463	SLC2A5	0.705386	FIS1
ENSG00000180758	1	9160364	9189229	107	22	145504	0.14867	0.44091	GPR157	0.655142	FIS1
ENSG00000049239	1	9294834	9331396	136	32	144549	1.3881	0.08256	H6PD	0.290027	FIS1
ENSG00000171621	1	9352939	9429591	437	66	145273	0.25161	0.40067	SPSB1	0.627502	FIS1
ENSG00000171612	1	9599541	9645237	97	22	145635	1.5796	0.0571	SLC25A33	0.237766	FIS1
ENSG00000188807	1	9648932	9674935	68	20	145665	1.511	0.065401	TMEM201	0.255545	FIS1
ENSG00000171608	1	9711790	9789172	236	53	145606	1.5965	0.055189	PIK3CD	0.233591	FIS1
ENSG00000179840	1	9712668	9714644	8	4	146019	0.058517	0.47667	C1orf200	0.679324	FIS1
ENSG00000171603	1	9789084	9884584	241	44	146047	-0.58099	0.71938	CLSTN1	0.83135	FIS1
ENSG00000178585	1	9908334	9970394	168	39	145811	-0.87663	0.80966	CTNNBIP1	0.885122	FIS1
ENSG00000162441	1	9982173	10003465	65	18	146187	-0.20322	0.58052	LZIC	0.747675	FIS1
ENSG00000173614	1	10003486	10045559	126	27	146017	0.35775	0.36026	NMNAT1	0.597732	FIS1
ENSG00000162444	1	10057264	10076078	54	10	146150	1.1004	0.13559	RBP7	0.372214	FIS1
ENSG00000130939	1	10092890	10241297	483	41	146094	1.8338	0.033345	UBE4B	0.177355	FIS1
ENSG00000054523	1	10270863	10441661	665	27	146239	0.75326	0.22565	KIF1B	0.476571	FIS1
ENSG00000142657	1	10458649	10480201	62	14	146068	0.39827	0.34522	PGD	0.587558	FIS1
ENSG00000175279	1	10490159	10512210	78	15	145943	1.5081	0.065765	APITD1	0.255913	FIS1
ENSG00000251503	1	10490159	10512210	78	15	145943	1.5081	0.065765	APITD1-CORT	0.255913	FIS1
ENSG00000241563	1	10509776	10511959	5	3	145188	1.0442	0.14821	CORT	0.388753	FIS1
ENSG00000160049	1	10516579	10532583	46	18	145747	1.8338	0.033345	DFFA	0.177355	FIS1
ENSG00000142655	1	10532345	10690815	532	51	145765	-0.063778	0.52543	PEX14	0.711545	FIS1
ENSG00000130940	1	10696661	10856707	579	109	145176	0.024501	0.49023	CASZ1	0.688011	FIS1
ENSG00000175262	1	11006528	11042094	146	22	145496	0.2886	0.38644	C1orf127	0.616477	FIS1
ENSG00000120948	1	11072414	11085796	36	10	145758	0.10875	0.4567	TARDBP	0.665008	FIS1
ENSG00000009724	1	11086580	11107290	83	17	145858	-0.72462	0.76566	MASP2	0.858936	FIS1
ENSG00000116649	1	11114641	11120081	9	3	146253	-0.43903	0.66968	SRM	0.802295	FIS1
ENSG00000171824	1	11126675	11159938	119	11	146094	-0.74886	0.77303	EXOSC10	0.86341	FIS1
ENSG00000198793	1	11166592	11322564	434	19	146139	-0.36741	0.64334	MTOR	0.784774	FIS1
ENSG00000171819	1	11249398	11256038	23	6	146010	-0.48373	0.68571	ANGPTL7	0.811802	FIS1
ENSG00000120942	1	11333263	11356106	52	11	145558	1.045	0.14801	UBIAD1	0.388498	FIS1
ENSG00000204624	1	11539223	11597641	195	25	145728	1.8122	0.034979	PTCHD2	0.181683	FIS1
ENSG00000116661	1	11708424	11715842	24	15	144299	-0.38268	0.64902	FBXO2	0.788928	FIS1
ENSG00000132879	1	11714432	11723384	30	12	145174	-1.9774	0.976	FBXO44	0.98361	FIS1
ENSG00000116663	1	11724181	11734411	43	14	145501	-0.54586	0.70742	FBXO6	0.823979	FIS1
ENSG00000116670	1	11734537	11751707	71	17	144766	-0.91106	0.81887	MAD2L2	0.890311	FIS1
ENSG00000162490	1	11751786	11785914	117	32	144777	1.743	0.04067	DRAXIN	0.197141	FIS1
ENSG00000177674	1	11796141	11814859	73	14	145100	0.44306	0.32886	AGTRAP	0.573294	FIS1
ENSG00000215910	1	11821844	11849642	169	15	145302	-1.825	0.966	C1orf167	0.977043	FIS1
ENSG00000177000	1	11845780	11866977	95	16	146040	-1.4345	0.92429	MTHFR	0.951429	FIS1
ENSG00000011021	1	11866207	11903201	221	20	146080	-1.1853	0.88205	CLCN6	0.925802	FIS1
ENSG00000175206	1	11905766	11908402	17	7	145771	0.05761	0.47703	NPPA	0.679521	FIS1
ENSG00000120937	1	11917521	11918988	3	2	146438	-0.70477	0.75952	NPPB	0.855444	FIS1
ENSG00000116685	1	11979648	11986485	29	11	145794	-0.41032	0.65921	KIAA2013	0.795212	FIS1
ENSG00000083444	1	11994262	12035595	166	25	145450	0.071805	0.47138	PLOD1	0.676082	FIS1
ENSG00000116688	1	12040238	12073571	102	15	145480	-0.98772	0.83835	MFN2	0.90122	FIS1
ENSG00000116691	1	12079523	12092102	34	11	145550	-1.0551	0.85432	MIIP	0.910863	FIS1
ENSG00000120949	1	12123434	12204264	253	49	144944	1.1774	0.11951	TNFRSF8	0.350691	FIS1
ENSG00000028137	1	12227060	12269285	155	25	145520	0.7016	0.24146	TNFRSF1B	0.494313	FIS1
ENSG00000048707	1	12290124	12572099	767	36	146068	0.41616	0.33865	VPS13D	0.581739	FIS1
ENSG00000162496	1	12627939	12677737	211	47	145453	-1.0263	0.84762	DHRS3	0.906535	FIS1
ENSG00000204518	1	12704566	12727097	81	13	145565	-0.16849	0.5669	AADACL4	0.738107	FIS1
ENSG00000188984	1	12776118	12788726	54	10	145614	-1.2364	0.89185	AADACL3	0.932133	FIS1
ENSG00000157330	1	12806163	12823847	66	16	145522	-1.8254	0.96603	C1orf158	0.977043	FIS1
ENSG00000116726	1	12834984	12838049	10	5	145295	-0.01192	0.50476	PRAMEF12	0.698035	FIS1
ENSG00000116721	1	12851546	12856777	6	4	143298	-0.27752	0.60931	PRAMEF1	0.765679	FIS1
ENSG00000204513	1	12884468	12891264	2	1	141831	-1.6475	0.95027	PRAMEF11	0.967001	FIS1
ENSG00000179172	1	12907261	12908578	1	1	146526	-0.30087	0.61824	HNRNPCL1	0.771217	FIS1
ENSG00000120952	1	12916941	12921764	12	3	144824	0.89905	0.18431	PRAMEF2	0.434898	FIS1
ENSG00000243073	1	12939045	12946025	4	2	145039	-0.64144	0.73938	PRAMEF4	0.842916	FIS1
ENSG00000162494	1	13801445	13840543	185	47	144592	0.78063	0.21751	LRRC38	0.468598	FIS1
ENSG00000162493	1	13909960	13944452	156	41	145309	-0.59347	0.72357	PDPN	0.833796	FIS1
ENSG00000116731	1	14026693	14151574	490	43	146066	1.4283	0.076608	PRDM2	0.277741	FIS1
ENSG00000189337	1	14925200	15444539	2443	268	145309	1.8379	0.033038	KAZN	0.176669	FIS1
ENSG00000171729	1	15479028	15546976	413	36	145334	0.76442	0.22231	TMEM51	0.473593	FIS1
ENSG00000204464	1	15490840	15497813	31	9	145291	0.44315	0.32883	C1orf195	0.573294	FIS1
ENSG00000142621	1	15573768	15726779	605	82	145695	-0.27226	0.60729	FHAD1	0.764156	FIS1
ENSG00000142634	1	15736391	15756839	78	27	145187	1.0127	0.15561	EFHD2	0.398429	FIS1
ENSG00000162438	1	15764935	15775737	32	13	145489	0.48101	0.31525	CTRC	0.562402	FIS1
ENSG00000142615	1	15783223	15798586	74	15	145675	-0.68175	0.7523	CELA2A	0.851378	FIS1
ENSG00000215704	1	15792404	15817895	109	24	145901	0.4807	0.31537	CELA2B	0.562457	FIS1
ENSG00000132906	1	15817327	15853029	160	15	146207	0.95354	0.17016	CASP9	0.418322	FIS1
ENSG00000116138	1	15853308	15918874	255	18	146045	1.0191	0.15408	DNAJC16	0.396656	FIS1
ENSG00000116771	1	15898848	15911605	64	11	146258	0.4687	0.31964	AGMAT	0.565694	FIS1
ENSG00000197312	1	15943995	15995539	152	14	146123	0.49466	0.31042	DDI2	0.557417	FIS1
ENSG00000215695	1	15986364	15988217	5	3	146450	0.074784	0.47019	RSC1A1	0.675276	FIS1
ENSG00000116786	1	16010827	16061264	189	22	145980	0.2097	0.41695	PLEKHM2	0.638519	FIS1
ENSG00000162461	1	16062900	16067891	10	5	145853	1.0827	0.13947	SLC25A34	0.377352	FIS1
ENSG00000162460	1	16068917	16074477	26	8	145860	-0.0046488	0.50185	TMEM82	0.696131	FIS1
ENSG00000162458	1	16083102	16113089	127	26	145663	0.51784	0.30229	FBLIM1	0.550651	FIS1
ENSG00000065526	1	16174359	16266955	238	39	146238	1.6699	0.047473	SPEN	0.214759	FIS1
ENSG00000116809	1	16268364	16302627	91	28	146168	2.5021	0.0061728	ZBTB17	0.0653086	FIS1
ENSG00000183888	1	16330731	16335302	23	9	146121	1.6048	0.054271	C1orf64	0.23123	FIS1
ENSG00000173641	1	16340523	16346089	52	7	145960	2.15	0.015776	HSPB7	0.115678	FIS1
ENSG00000186510	1	16345370	16360545	108	21	146085	1.9447	0.025907	CLCNKA	0.154624	FIS1
ENSG00000184908	1	16370272	16383803	127	19	145623	1.6806	0.046421	CLCNKB	0.212327	FIS1
ENSG00000185519	1	16384264	16400127	67	11	145608	1.1233	0.13065	FAM131C	0.365526	FIS1
ENSG00000142627	1	16450832	16482582	87	27	145265	1.5359	0.06228	EPHA2	0.249384	FIS1
ENSG00000142632	1	16524349	16539104	67	11	146113	0.29139	0.38538	ARHGEF19	0.61593	FIS1
ENSG00000204377	1	16555368	16556038	3	1	145699	1.0968	0.13637	C1orf134	0.37324	FIS1
ENSG00000132881	1	16558195	16563657	20	9	145866	-0.38174	0.64867	RSG1	0.788665	FIS1
ENSG00000037637	1	16573334	16678949	301	23	146119	0.29199	0.38515	FBXO42	0.615771	FIS1
ENSG00000055070	1	16679070	16724640	137	23	146066	1.1581	0.12342	SZRD1	0.355788	FIS1
ENSG00000187144	1	16713612	16763919	176	37	145329	0.63439	0.26291	SPATA21	0.5146	FIS1
ENSG00000157191	1	16767167	16786573	65	20	146005	0.44739	0.3273	NECAP2	0.571929	FIS1
ENSG00000219481	1	16888814	16940057	1	1	142091	0.034067	0.48641	NBPF1	0.685962	FIS1
ENSG00000058453	1	17066768	17299474	137	45	145049	0.12607	0.44984	CROCC	0.660531	FIS1
ENSG00000117122	1	17300997	17307330	18	7	145624	1.2482	0.10598	MFAP2	0.328888	FIS1
ENSG00000159363	1	17312453	17338423	64	16	146070	0.42211	0.33647	ATP13A2	0.579784	FIS1
ENSG00000117118	1	17345217	17380665	140	17	145978	0.8881	0.18724	SDHB	0.437665	FIS1
ENSG00000117115	1	17393256	17445948	300	24	145924	1.1966	0.11572	PADI2	0.345144	FIS1
ENSG00000142623	1	17531621	17572500	200	59	145308	-0.92754	0.82318	PADI1	0.892694	FIS1
ENSG00000142619	1	17575593	17610728	215	38	145711	1.5615	0.059203	PADI3	0.242879	FIS1
ENSG00000159339	1	17634690	17690499	328	31	145823	0.23153	0.40845	PADI4	0.632733	FIS1
ENSG00000269468	1	17655507	17676070	163	17	146183	0.28039	0.38959	AC004824.2	0.619093	FIS1
ENSG00000179051	1	17733256	17766220	119	28	145970	2.7025	0.0034405	RCC2	0.0455583	FIS1
ENSG00000074964	1	17866330	18024369	563	77	145433	0.76412	0.2224	ARHGEF10L	0.473731	FIS1
ENSG00000117148	1	18081808	18153558	244	40	145670	0.16446	0.43468	ACTL8	0.650636	FIS1
ENSG00000117154	1	18434240	18704977	1240	171	145417	1.649	0.049578	IGSF21	0.220231	FIS1
ENSG00000179023	1	18807424	18812478	29	7	145863	0.60554	0.27241	KLHDC7A	0.523595	FIS1
ENSG00000009709	1	18957500	19075360	470	90	145242	-0.52073	0.69872	PAX7	0.819335	FIS1
ENSG00000179002	1	19166093	19186176	124	25	145707	0.43244	0.33271	TAS1R2	0.576356	FIS1
ENSG00000255275	1	19175767	19247615	436	55	145546	-0.52404	0.69988	RP13-279N23.2	0.819865	FIS1
ENSG00000159423	1	19197926	19229275	187	33	145545	-0.14647	0.55822	ALDH4A1	0.73321	FIS1
ENSG00000169991	1	19230775	19283180	254	43	145691	-0.67989	0.75171	IFFO2	0.851067	FIS1
ENSG00000127481	1	19401000	19536770	365	32	146207	-0.56038	0.71239	UBR4	0.826845	FIS1
ENSG00000127463	1	19542158	19578046	136	20	145836	-1.378	0.9159	EMC1	0.94635	FIS1
ENSG00000053372	1	19578033	19586622	58	10	146206	-1.2422	0.89292	MRTO4	0.932673	FIS1
ENSG00000162482	1	19609052	19615744	30	6	145993	-0.15418	0.56126	AKR7A3	0.734725	FIS1
ENSG00000053371	1	19630459	19638640	28	12	145412	-0.072303	0.52882	AKR7A2	0.71396	FIS1
ENSG00000040487	1	19638820	19655794	97	16	145277	-0.88777	0.81267	PQLC2	0.886701	FIS1
ENSG00000077549	1	19665267	19812066	689	37	145670	-0.58624	0.72114	CAPZB	0.832264	FIS1
ENSG00000270136	1	19923473	19984549	211	42	145584	-1.1738	0.87977	MINOS1-NBL1	0.924539	FIS1
ENSG00000173436	1	19923477	19956314	93	20	145847	-1.7607	0.96085	MINOS1	0.973628	FIS1
ENSG00000158747	1	19967048	19984945	71	25	145114	0.045691	0.48178	NBL1	0.682693	FIS1
ENSG00000158748	1	19991780	20006055	56	14	146111	-0.11723	0.54666	HTR6	0.726076	FIS1
ENSG00000162542	1	20008706	20126438	492	76	145278	0.065755	0.47379	TMCO4	0.677416	FIS1
ENSG00000178828	1	20140523	20141771	9	5	145838	1.2414	0.10724	RNF186	0.330734	FIS1
ENSG00000169914	1	20209006	20239438	98	23	145754	0.23174	0.40837	OTUD3	0.632733	FIS1
ENSG00000188784	1	20246502	20250110	22	8	145847	0.06712	0.47324	PLA2G2E	0.67704	FIS1
ENSG00000188257	1	20301925	20306932	21	11	145442	-0.010029	0.504	PLA2G2A	0.697573	FIS1
ENSG00000127472	1	20354672	20417683	256	27	146119	0.30512	0.38014	PLA2G5	0.612304	FIS1
ENSG00000117215	1	20438432	20446050	28	15	145282	-0.50097	0.6918	PLA2G2D	0.815131	FIS1
ENSG00000158786	1	20465819	20476879	26	16	145033	0.36261	0.35845	PLA2G2F	0.596029	FIS1
ENSG00000187980	1	20487746	20503917	65	16	145812	-0.062117	0.52477	PLA2G2C	0.711222	FIS1
ENSG00000162543	1	20512578	20522541	22	12	144767	1.6926	0.045262	UBXN10	0.209882	FIS1
ENSG00000158816	1	20617412	20681387	308	35	145767	1.7421	0.040742	VWA5B1	0.197299	FIS1
ENSG00000162545	1	20808884	20812713	7	4	146175	1.8915	0.02928	CAMK2N1	0.16496	FIS1
ENSG00000090432	1	20825943	20834654	38	16	145548	3.1713	0.00075873	MUL1	0.015842	FIS1
ENSG00000183114	1	20878932	20881512	7	3	146131	4.3926	5.5998e-06	FAM43B	0.0004445	FIS1
ENSG00000158825	1	20915441	20945401	137	24	145918	0.47439	0.31761	CDA	0.564003	FIS1
ENSG00000158828	1	20959948	20978004	77	12	146006	1.5806	0.056983	PINK1	0.237536	FIS1
ENSG00000244038	1	20978270	20988000	34	9	146181	2.1666	0.015133	DDOST	0.113428	FIS1
ENSG00000117245	1	20990507	21044510	238	63	145316	0.66908	0.25172	KIF17	0.504421	FIS1
ENSG00000189410	1	21046225	21059330	50	15	145523	-0.3541	0.63837	SH2D5	0.782384	FIS1
ENSG00000127483	1	21069154	21113816	117	23	145618	1.2663	0.1027	HP1BP3	0.323544	FIS1
ENSG00000075151	1	21132963	21503377	997	48	145976	0.87959	0.18954	EIF4G3	0.440419	FIS1
ENSG00000117298	1	21543740	21671997	469	64	145371	1.3098	0.095132	ECE1	0.312262	FIS1
ENSG00000142794	1	21766621	21811498	172	22	146198	0.43597	0.33143	NBPF3	0.575193	FIS1
ENSG00000162551	1	21835858	21904905	354	36	145793	0.24399	0.40362	ALPL	0.630018	FIS1
ENSG00000076864	1	21922708	21995801	323	53	145567	1.2191	0.11141	RAP1GAP	0.337318	FIS1
ENSG00000090686	1	22004791	22110099	444	44	145983	-0.97966	0.83637	USP48	0.90024	FIS1
ENSG00000187942	1	22138758	22151714	53	26	145704	0.021879	0.49127	LDLRAD2	0.68895	FIS1
ENSG00000142798	1	22148738	22263790	501	62	145728	1.799	0.036006	HSPG2	0.184783	FIS1
ENSG00000219073	1	22303514	22325135	104	18	145934	0.81394	0.20784	CELA3B	0.459512	FIS1
ENSG00000142789	1	22328149	22339032	22	7	145845	0.84968	0.19775	CELA3A	0.44826	FIS1
ENSG00000070831	1	22379120	22419437	147	30	146124	3.1278	0.00088074	CDC42	0.0174987	FIS1
ENSG00000162552	1	22443798	22470462	121	28	146047	4.8826	5.2338e-07	WNT4	6.99804e-05	FIS1
ENSG00000184677	1	22778344	22857650	222	36	146029	0.387	0.34938	ZBTB40	0.5898	FIS1
ENSG00000070886	1	22890057	22930087	178	33	145321	2.0905	0.018288	EPHA8	0.126166	FIS1
ENSG00000173372	1	22962999	22966101	9	5	146171	2.7261	0.0032041	C1QA	0.0434527	FIS1
ENSG00000159189	1	22970123	22974603	25	6	145568	-0.30742	0.62074	C1QC	0.772626	FIS1
ENSG00000173369	1	22979255	22988031	37	11	145912	1.9198	0.027442	C1QB	0.159705	FIS1
ENSG00000133216	1	23037332	23241818	646	98	145307	0.035476	0.48585	EPHB2	0.685838	FIS1
ENSG00000215906	1	23279536	23291831	44	13	145225	1.9511	0.02552	LACTBL1	0.15344	FIS1
ENSG00000227868	1	23337327	23342343	12	4	145688	1.0099	0.15626	C1orf234	0.399145	FIS1
ENSG00000004487	1	23345941	23410182	107	20	145869	0.58431	0.27951	KDM1A	0.529577	FIS1
ENSG00000169641	1	23410516	23504301	232	36	146072	1.901	0.028648	LUZP1	0.163101	FIS1
ENSG00000179546	1	23516993	23521222	13	5	146147	0.82531	0.2046	HTR1D	0.455696	FIS1
ENSG00000125944	1	23630264	23670829	70	21	145564	2.626	0.0043194	HNRNPR	0.0527257	FIS1
ENSG00000125945	1	23685941	23695935	36	9	145828	2.5986	0.00468	ZNF436	0.0553361	FIS1
ENSG00000249087	1	23695490	23698332	4	2	146360	2.2129	0.013454	C1orf213	0.106016	FIS1
ENSG00000204219	1	23707554	23751233	149	28	145925	0.43947	0.33016	TCEA3	0.5745	FIS1
ENSG00000088280	1	23755056	23811061	168	30	146175	-0.60884	0.72869	ASAP3	0.837002	FIS1
ENSG00000007968	1	23832922	23857712	60	12	146082	-0.57517	0.71741	E2F2	0.830272	FIS1
ENSG00000117318	1	23884409	23886285	8	3	143779	0.034515	0.48623	ID3	0.685913	FIS1
ENSG00000197880	1	23907985	23967058	170	53	145642	-1.8067	0.9646	MDS2	0.976172	FIS1
ENSG00000142676	1	24018269	24022915	14	5	145765	1.0271	0.15218	RPL11	0.394293	FIS1
ENSG00000011007	1	24069645	24088549	30	17	145843	-2.7236	0.99677	TCEB3	0.997668	FIS1
ENSG00000057757	1	24104895	24114722	18	11	145713	0.37246	0.35477	PITHD1	0.59355	FIS1
ENSG00000011009	1	24117460	24122029	6	3	146278	-0.42574	0.66485	LYPLA2	0.799021	FIS1
ENSG00000117308	1	24122089	24127271	5	3	144609	0.57592	0.28234	GALE	0.532339	FIS1
ENSG00000117305	1	24128375	24165110	69	12	145853	-1.4798	0.93054	HMGCL	0.95552	FIS1
ENSG00000179163	1	24171567	24194784	54	13	145952	-1.2939	0.90215	FUCA1	0.93701	FIS1
ENSG00000188822	1	24197016	24285549	231	21	145713	0.68981	0.24516	CNR2	0.498003	FIS1
ENSG00000189266	1	24285599	24289952	1	1	146526	0.043817	0.48252	PNRC2	0.683445	FIS1
ENSG00000188529	1	24291294	24307417	2	1	146526	-0.22114	0.58751	SRSF10	0.751402	FIS1
ENSG00000142661	1	24382525	24438665	232	34	145371	0.85149	0.19725	MYOM3	0.448039	FIS1
ENSG00000142677	1	24446261	24469611	91	23	145453	-0.95764	0.83088	IL22RA1	0.896853	FIS1
ENSG00000185436	1	24480647	24514449	157	28	145009	-1.3114	0.90514	IFNLR1	0.93898	FIS1
ENSG00000158055	1	24645812	24690972	143	36	145633	0.60065	0.27404	GRHL3	0.524859	FIS1
ENSG00000001460	1	24683489	24743424	200	27	145965	1.0546	0.1458	STPG1	0.385697	FIS1
ENSG00000001461	1	24742284	24799466	219	29	145263	0.85961	0.195	NIPAL3	0.445673	FIS1
ENSG00000117602	1	24829387	24867530	134	21	145970	0.26917	0.3939	RCAN3	0.622643	FIS1
ENSG00000184454	1	24882602	24935819	271	34	145513	-0.81267	0.7918	NCMAP	0.873277	FIS1
ENSG00000133226	1	24958207	24999758	75	21	145375	1.0913	0.13757	SRRM1	0.375003	FIS1
ENSG00000169504	1	25071848	25170815	175	36	145855	1.6167	0.052968	CLIC4	0.228096	FIS1
ENSG00000020633	1	25226002	25291612	194	50	145317	-1.1949	0.88393	RUNX3	0.926849	FIS1
ENSG00000117614	1	25549170	25558993	15	9	145560	-1.8987	0.9712	SYF2	0.980589	FIS1
ENSG00000117616	1	25568728	25664704	78	35	145549	0.081261	0.46762	C1orf63	0.672812	FIS1
ENSG00000187010	1	25598884	25656936	22	13	145350	-1.4951	0.93256	RHD	0.956719	FIS1
ENSG00000183726	1	25664408	25688852	68	15	145802	-0.27199	0.60719	TMEM50A	0.764133	FIS1
ENSG00000188672	1	25688740	25756683	149	20	145759	0.53063	0.29784	RHCE	0.546655	FIS1
ENSG00000204178	1	25757388	25826700	158	14	145707	1.0891	0.13805	TMEM57	0.375662	FIS1
ENSG00000157978	1	25870071	25895377	91	17	145813	-0.35186	0.63753	LDLRAP1	0.781902	FIS1
ENSG00000117643	1	25943959	26112698	470	51	145680	0.091885	0.46339	MAN1C1	0.669743	FIS1
ENSG00000162430	1	26126667	26144713	58	9	145280	-0.10447	0.5416	SEPN1	0.722963	FIS1
ENSG00000255054	1	26137961	26150235	43	7	146008	0.3455	0.36486	RP1-317E23.6	0.600608	FIS1
ENSG00000117640	1	26145131	26159432	39	5	146109	0.15363	0.43895	MTFR1L	0.653655	FIS1
ENSG00000223474	1	26145212	26147288	7	3	146156	0.10558	0.45796	AL020996.1	0.665919	FIS1
ENSG00000127423	1	26158414	26185903	77	6	146135	0.26135	0.39691	AUNIP	0.625053	FIS1
ENSG00000182749	1	26187701	26197744	14	7	145887	-0.24059	0.59506	PAQR7	0.756018	FIS1
ENSG00000117632	1	26210672	26233482	35	9	145772	0.57353	0.28314	STMN1	0.533368	FIS1
ENSG00000158006	1	26286258	26324648	106	12	145845	1.6779	0.046679	PAFAH2	0.212541	FIS1
ENSG00000158008	1	26346375	26362955	36	12	145956	2.0113	0.022147	EXTL1	0.140384	FIS1
ENSG00000158014	1	26363743	26372624	23	6	146075	1.3663	0.085922	SLC30A2	0.296599	FIS1
ENSG00000158022	1	26377795	26394927	58	12	145764	1.1311	0.12901	TRIM63	0.363088	FIS1
ENSG00000175087	1	26437664	26452034	39	4	145793	0.70041	0.24183	PDIK1L	0.494494	FIS1
ENSG00000197245	1	26485511	26489119	15	8	146010	-0.98533	0.83777	FAM110D	0.900842	FIS1
ENSG00000142684	1	26496362	26498551	10	3	146365	-1.1686	0.87872	ZNF593	0.923898	FIS1
ENSG00000142675	1	26503894	26516377	35	12	146114	0.098385	0.46081	CNKSR1	0.668007	FIS1
ENSG00000188782	1	26517052	26529459	71	14	145897	0.54748	0.29202	CATSPER4	0.54139	FIS1
ENSG00000130695	1	26560691	26605299	166	18	146255	1.2297	0.10941	CEP85	0.334316	FIS1
ENSG00000142669	1	26605667	26608007	7	3	145662	0.27382	0.39211	SH3BGRL3	0.621217	FIS1
ENSG00000158062	1	26607819	26644854	160	18	146227	0.85333	0.19674	UBXN11	0.447356	FIS1
ENSG00000169442	1	26644448	26647014	13	4	146289	1.2384	0.10778	CD52	0.33175	FIS1
ENSG00000176092	1	26648350	26680621	120	21	145890	1.0971	0.13629	AIM1L	0.373157	FIS1
ENSG00000176083	1	26688125	26701013	65	15	146118	1.8164	0.034658	ZNF683	0.180811	FIS1
ENSG00000131914	1	26737269	26756213	47	17	144980	4.2389	1.1233e-05	LIN28A	0.00076352	FIS1
ENSG00000117682	1	26758773	26797785	99	33	145946	3.426	0.00030626	DHDDS	0.00814628	FIS1
ENSG00000198830	1	26798941	26802463	8	5	146133	0.48935	0.3123	HMGN2	0.559251	FIS1
ENSG00000117676	1	26856252	26901521	132	23	145754	2.8707	0.0020478	RPS6KA1	0.0321703	FIS1
ENSG00000117713	1	27022524	27108595	181	22	146131	2.2503	0.012216	ARID1A	0.100406	FIS1
ENSG00000060642	1	27113963	27124889	22	9	145986	1.897	0.028915	PIGV	0.163903	FIS1
ENSG00000204160	1	27153201	27184093	75	18	145861	2.1849	0.01445	ZDHHC18	0.110545	FIS1
ENSG00000175793	1	27189633	27190947	1	1	146526	0.71229	0.23814	SFN	0.490867	FIS1
ENSG00000142751	1	27202624	27216788	28	8	145936	1.8494	0.032198	GPN2	0.174308	FIS1
ENSG00000198746	1	27216979	27226957	17	8	146041	0.79608	0.21299	GPATCH3	0.463942	FIS1
ENSG00000090273	1	27226729	27273353	105	24	146014	2.0079	0.022325	NUDC	0.141041	FIS1
ENSG00000131910	1	27237980	27240457	8	5	146121	1.2558	0.10459	NR0B2	0.326829	FIS1
ENSG00000175707	1	27276053	27286897	15	5	146332	2.0172	0.021837	C1orf172	0.13945	FIS1
ENSG00000253368	1	27320198	27327389	14	8	145451	0.4884	0.31263	TRNP1	0.559471	FIS1
ENSG00000158246	1	27331511	27339327	13	8	145333	0.54767	0.29196	FAM46B	0.54139	FIS1
ENSG00000090020	1	27425306	27493472	125	23	145797	0.19482	0.42276	SLC9A1	0.642142	FIS1
ENSG00000142784	1	27561007	27635110	143	27	146057	-0.59471	0.72398	WDTC1	0.83415	FIS1
ENSG00000186501	1	27648651	27662891	52	18	145985	0.33162	0.37009	TMEM222	0.60568	FIS1
ENSG00000142765	1	27668513	27680421	35	12	145845	0.22397	0.41139	SYTL1	0.634737	FIS1
ENSG00000142733	1	27681675	27693383	36	13	145791	0.68821	0.24566	MAP3K6	0.498523	FIS1
ENSG00000142748	1	27695603	27701315	12	9	145095	1.9237	0.027194	FCN3	0.158843	FIS1
ENSG00000174950	1	27705666	27709870	5	2	145777	0.24958	0.40146	CD164L2	0.628239	FIS1
ENSG00000181773	1	27719148	27722318	6	4	146215	0.28882	0.38636	GPR3	0.616433	FIS1
ENSG00000158195	1	27730730	27816669	201	25	145969	-0.28898	0.6137	WASF2	0.768487	FIS1
ENSG00000126705	1	27860546	27930942	124	32	145780	1.1951	0.11603	AHDC1	0.345439	FIS1
ENSG00000000938	1	27938575	27961788	53	12	145865	1.2075	0.11362	FGR	0.34133	FIS1
ENSG00000126709	1	27992572	27998729	13	4	146186	-0.07637	0.53044	IFI6	0.714819	FIS1
ENSG00000009780	1	28052490	28089633	102	11	146097	0.39266	0.34728	FAM76A	0.588644	FIS1
ENSG00000117758	1	28099694	28150963	86	14	146032	0.013849	0.49448	STX12	0.691204	FIS1
ENSG00000117751	1	28157289	28178187	42	13	145906	-2.2023	0.98618	PPP1R8	0.990584	FIS1
ENSG00000130775	1	28199055	28213196	59	14	145232	0.91043	0.1813	THEMIS2	0.431786	FIS1
ENSG00000117748	1	28218035	28241257	78	12	146013	0.83	0.20327	RPA2	0.454461	FIS1
ENSG00000130768	1	28261504	28285668	100	21	145628	0.79714	0.21269	SMPDL3B	0.463765	FIS1
ENSG00000158156	1	28285973	28294607	34	14	145851	1.2138	0.11242	XKR8	0.338964	FIS1
ENSG00000158161	1	28296855	28415207	415	36	146112	1.1811	0.11878	EYA3	0.349614	FIS1
ENSG00000169403	1	28473677	28520447	104	38	145605	0.57084	0.28405	PTAFR	0.534017	FIS1
ENSG00000126698	1	28525967	28559536	122	21	146038	0.56778	0.28509	DNAJC8	0.534908	FIS1
ENSG00000215902	1	28527013	28527152	1	1	146329	0.8323	0.20262	AL353354.1	0.453791	FIS1
ENSG00000269804	1	28527070	28527419	1	1	146329	0.8323	0.20262	AL353354.2	0.453791	FIS1
ENSG00000130770	1	28562620	28573417	43	6	146267	0.72491	0.23425	ATPIF1	0.486389	FIS1
ENSG00000130766	1	28586038	28609002	82	24	146155	0.13259	0.44726	SESN2	0.658929	FIS1
ENSG00000130772	1	28655513	28662476	14	8	145820	1.1002	0.13563	MED18	0.372214	FIS1
ENSG00000204138	1	28696114	28826881	460	17	146245	-1.77	0.96163	PHACTR4	0.974208	FIS1
ENSG00000180198	1	28832455	28865812	105	20	146095	-2.7999	0.99744	RCC1	0.99821	FIS1
ENSG00000180098	1	28879597	28905051	58	14	145475	-1.1598	0.87693	TRNAU1AP	0.92294	FIS1
ENSG00000120656	1	28915835	28969597	108	29	145929	-0.36101	0.64095	TAF12	0.783182	FIS1
ENSG00000188060	1	28918712	28921955	11	7	145782	0.8629	0.1941	RAB42	0.445185	FIS1
ENSG00000162419	1	28995244	29045865	116	22	146057	0.808	0.20954	GMEB1	0.460579	FIS1
ENSG00000198492	1	29063133	29096287	87	22	146096	0.63141	0.26389	YTHDF2	0.515576	FIS1
ENSG00000116329	1	29138654	29190208	199	30	145436	0.34794	0.36394	OPRD1	0.60003	FIS1
ENSG00000159023	1	29213603	29446553	592	38	146083	3.6791	0.00011705	EPB41	0.00413628	FIS1
ENSG00000253304	1	29445940	29450447	15	6	145992	3.5012	0.0002316	TMEM200B	0.0067777	FIS1
ENSG00000116350	1	29474255	29508499	88	24	145250	3.225	0.00062995	SRSF4	0.0137613	FIS1
ENSG00000116353	1	29519385	29557454	125	25	146260	3.7074	0.00010469	MECR	0.00382818	FIS1
ENSG00000060656	1	29563028	29653325	301	48	145372	2.4418	0.0073062	PTPRU	0.0719052	FIS1
ENSG00000162510	1	31184124	31196434	37	6	145821	0.60681	0.27199	MATN1	0.523	FIS1
ENSG00000162511	1	31205316	31230667	82	32	144809	1.0941	0.13697	LAPTM5	0.373961	FIS1
ENSG00000162512	1	31342314	31381608	124	47	145102	1.4947	0.067492	SDC3	0.259108	FIS1
ENSG00000134644	1	31404353	31538838	442	40	146081	0.14109	0.4439	PUM1	0.656656	FIS1
ENSG00000084628	1	31652592	31712401	277	22	145882	1.6601	0.048448	NKAIN1	0.217621	FIS1
ENSG00000060688	1	31732417	31769662	133	15	146158	0.95189	0.17058	SNRNP40	0.418361	FIS1
ENSG00000121766	1	31769842	31837783	206	19	146141	1.1552	0.124	ZCCHC17	0.356474	FIS1
ENSG00000121769	1	31838472	31849697	35	17	146067	0.81195	0.20841	FABP3	0.459899	FIS1
ENSG00000168528	1	31882412	31907525	99	16	145815	1.2228	0.11071	SERINC2	0.336493	FIS1
ENSG00000268950	1	31902192	31902614	3	2	145845	1.5325	0.062695	AC114494.1	0.250254	FIS1
ENSG00000142910	1	32042116	32053288	18	12	145621	2.7889	0.0026445	TINAGL1	0.0383798	FIS1
ENSG00000121764	1	32083287	32098119	40	7	146060	5.6464	8.191e-09	HCRTR1	2.17996e-06	FIS1
ENSG00000162517	1	32095463	32110497	31	7	146055	5.7205	5.3117e-09	PEF1	1.52076e-06	FIS1
ENSG00000084636	1	32117848	32169920	153	38	145642	4.9577	3.5663e-07	COL16A1	5.15675e-05	FIS1
ENSG00000121753	1	32192718	32230494	107	21	146016	0.28031	0.38962	BAI2	0.619093	FIS1
ENSG00000134668	1	32256023	32281652	86	21	145190	0.35142	0.36264	SPOCD1	0.599042	FIS1
ENSG00000184007	1	32372022	32410457	82	25	146023	1.4441	0.074361	PTP4A2	0.273494	FIS1
ENSG00000212673	1	32379174	32380745	2	1	146206	-0.22373	0.58852	AL136115.1	0.751943	FIS1
ENSG00000121774	1	32479430	32526451	71	46	146013	1.8325	0.033439	KHDRBS1	0.17754	FIS1
ENSG00000121775	1	32537632	32568467	63	15	146096	2.4789	0.006589	TMEM39B	0.0676612	FIS1
ENSG00000025800	1	32573639	32642169	128	28	146205	2.4757	0.0066488	KPNA6	0.0680584	FIS1
ENSG00000084652	1	32645287	32663886	43	17	146230	2.198	0.013975	TXLNA	0.108359	FIS1
ENSG00000160050	1	32665987	32670988	7	5	146005	1.5672	0.058539	CCDC28B	0.241255	FIS1
ENSG00000160051	1	32671236	32674288	9	4	146441	2.3435	0.0095508	IQCC	0.0857349	FIS1
ENSG00000222046	1	32674695	32681797	25	16	146108	1.4078	0.079601	DCDC2B	0.2838	FIS1
ENSG00000160055	1	32680073	32687972	19	9	146123	2.1932	0.014147	TMEM234	0.109066	FIS1
ENSG00000084623	1	32687529	32697205	23	7	146140	2.3283	0.0099482	EIF3I	0.0879769	FIS1
ENSG00000183615	1	32712834	32714457	3	2	145937	0.4587	0.32322	FAM167B	0.568515	FIS1
ENSG00000182866	1	32716840	32751766	70	38	145930	1.6584	0.048621	LCK	0.218073	FIS1
ENSG00000116478	1	32757687	32799236	59	38	145931	0.32562	0.37235	HDAC1	0.607307	FIS1
ENSG00000175130	1	32799433	32801980	2	1	145687	-1.7571	0.96055	MARCKSL1	0.973481	FIS1
ENSG00000162526	1	32817122	32829913	10	7	145954	0.25004	0.40128	TSSK3	0.628114	FIS1
ENSG00000225828	1	32826871	32829879	2	1	145722	0.1213	0.45173	FAM229A	0.661902	FIS1
ENSG00000160058	1	32830704	32860332	44	29	145913	-0.32574	0.62769	BSDC1	0.775522	FIS1
ENSG00000254553	1	32930658	33066393	368	21	145967	0.18346	0.42722	RP1-27O5.3	0.645923	FIS1
ENSG00000273274	1	32930670	32962287	53	20	145793	1.0203	0.15379	ZBTB8B	0.396319	FIS1
ENSG00000160062	1	33005028	33071540	214	18	145929	0.31695	0.37564	ZBTB8A	0.609637	FIS1
ENSG00000176261	1	33065773	33116504	186	19	146007	0.78267	0.21691	ZBTB8OS	0.468105	FIS1
ENSG00000162521	1	33116743	33151812	115	12	146165	0.85281	0.19688	RBBP4	0.447513	FIS1
ENSG00000162520	1	33145507	33169197	75	9	145879	0.99436	0.16002	SYNC	0.404532	FIS1
ENSG00000162522	1	33207486	33240571	74	25	145817	1.9597	0.025018	KIAA1522	0.151817	FIS1
ENSG00000134684	1	33240840	33283754	106	21	146259	1.9039	0.02846	YARS	0.162691	FIS1
ENSG00000116497	1	33282368	33324476	117	31	146137	2.5083	0.0060663	S100PBP	0.0645796	FIS1
ENSG00000160097	1	33327869	33338083	18	8	146318	1.8211	0.034298	FNDC5	0.180227	FIS1
ENSG00000121905	1	33351595	33364042	27	11	146065	1.6561	0.04885	HPCA	0.218323	FIS1
ENSG00000121900	1	33360195	33367039	15	6	146158	-0.6388	0.73852	TMEM54	0.842461	FIS1
ENSG00000116514	1	33402046	33430286	78	16	146090	1.7803	0.037517	RNF19B	0.188543	FIS1
ENSG00000004455	1	33473585	33546597	183	26	145922	-1.59	0.94409	AK2	0.963361	FIS1
ENSG00000142920	1	33546705	33586131	93	28	145963	-0.47592	0.68293	ADC	0.809881	FIS1
ENSG00000116525	1	33611003	33647660	117	16	145463	-1.4995	0.93312	TRIM62	0.956887	FIS1
ENSG00000160094	1	33722146	33766320	105	23	145623	0.4097	0.34101	ZNF362	0.584094	FIS1
ENSG00000184389	1	33772367	33786699	40	13	146007	0.5672	0.28529	A3GALT2	0.534978	FIS1
ENSG00000134686	1	33789224	33896653	382	32	146116	0.21249	0.41586	PHC2	0.63778	FIS1
ENSG00000121903	1	33938246	33962107	69	13	145670	0.19013	0.4246	ZSCAN20	0.643707	FIS1
ENSG00000121904	1	33979609	34631443	2344	216	145483	2.5726	0.0050464	CSMD2	0.0582509	FIS1
ENSG00000176256	1	34326076	34330392	15	9	145643	1.6061	0.054121	HMGB4	0.230812	FIS1
ENSG00000142698	1	34632484	34684732	253	33	145969	-0.49567	0.68994	C1orf94	0.814259	FIS1
ENSG00000163866	1	35178338	35325417	643	88	145274	0.12284	0.45111	SMIM12	0.661404	FIS1
ENSG00000189280	1	35220648	35224113	16	9	145614	-2.0292	0.97878	GJB5	0.985771	FIS1
ENSG00000189433	1	35225342	35229325	24	14	145657	-1.2461	0.89364	GJB4	0.93291	FIS1
ENSG00000188910	1	35246790	35251970	16	6	144732	0.35346	0.36187	GJB3	0.598555	FIS1
ENSG00000187513	1	35258599	35261348	13	4	145873	0.44999	0.32636	GJA4	0.571256	FIS1
ENSG00000116544	1	35331037	35395186	146	51	144572	1.3739	0.08474	DLGAP3	0.294209	FIS1
ENSG00000271741	1	35447134	35497342	113	13	145996	1.5398	0.061811	RP11-244H3.4	0.248088	FIS1
ENSG00000243749	1	35447136	35450954	10	3	145997	1.8505	0.032122	ZMYM6NB	0.174074	FIS1
ENSG00000163867	1	35449523	35497569	106	13	146010	1.485	0.06877	ZMYM6	0.261517	FIS1
ENSG00000197056	1	35525387	35581460	143	27	145835	1.4572	0.072528	ZMYM1	0.269728	FIS1
ENSG00000116560	1	35641979	35658749	57	10	146101	-0.079403	0.53164	SFPQ	0.715824	FIS1
ENSG00000146463	1	35734568	35887659	351	34	146009	-0.30945	0.62151	ZMYM4	0.772875	FIS1
ENSG00000142687	1	35899091	36023551	279	34	146040	-0.38384	0.64945	KIAA0319L	0.789044	FIS1
ENSG00000020129	1	36023074	36032875	22	8	146090	-1.2624	0.8966	NCDN	0.934268	FIS1
ENSG00000116819	1	36038971	36060929	47	17	145945	-0.94911	0.82872	TFAP2E	0.895493	FIS1
ENSG00000126067	1	36067185	36107445	70	26	145939	0.1204	0.45208	PSMB2	0.662056	FIS1
ENSG00000142686	1	36179476	36185073	10	5	146202	0.23501	0.4071	C1orf216	0.631812	FIS1
ENSG00000092853	1	36185819	36235568	86	20	146072	-0.21156	0.58377	CLSPN	0.749536	FIS1
ENSG00000134698	1	36273773	36323491	99	27	145865	0.67317	0.25042	AGO4	0.502863	FIS1
ENSG00000092847	1	36335409	36395211	137	38	145892	0.46953	0.31934	AGO1	0.565375	FIS1
ENSG00000126070	1	36396319	36538101	256	37	145811	-0.3417	0.63371	AGO3	0.779646	FIS1
ENSG00000092850	1	36549676	36553876	5	3	146222	0.70297	0.24104	TEKT2	0.493948	FIS1
ENSG00000116863	1	36554476	36559533	10	6	145722	-1.168	0.8786	ADPRHL2	0.923898	FIS1
ENSG00000171812	1	36560837	36590821	89	19	145662	0.11231	0.45529	COL8A2	0.664284	FIS1
ENSG00000054116	1	36602173	36615098	39	9	145707	1.1346	0.12828	TRAPPC3	0.362383	FIS1
ENSG00000116871	1	36621180	36646450	53	16	145668	1.998	0.022859	MAP7D1	0.143265	FIS1
ENSG00000054118	1	36690017	36770958	150	25	145554	0.5302	0.29799	THRAP3	0.546788	FIS1
ENSG00000214193	1	36771988	36790484	42	19	145474	1.3497	0.088549	SH3D21	0.301604	FIS1
ENSG00000142694	1	36787632	36789755	6	3	144969	1.9168	0.027631	EVA1B	0.160176	FIS1
ENSG00000116883	1	36789335	36794822	21	8	145267	-0.20779	0.5823	RP11-268J15.5	0.748947	FIS1
ENSG00000196182	1	36805225	36851497	106	26	145563	0.43335	0.33238	STK40	0.576153	FIS1
ENSG00000181817	1	36856839	36863493	42	8	145887	2.0784	0.018837	LSM10	0.12821	FIS1
ENSG00000116885	1	36881428	36916086	177	13	146241	1.3962	0.081332	OSCP1	0.287619	FIS1
ENSG00000116898	1	36921319	36930038	50	10	146124	1.7331	0.041537	MRPS15	0.199247	FIS1
ENSG00000119535	1	36931644	36948879	63	21	145518	2.8291	0.0023339	CSF3R	0.0352811	FIS1
ENSG00000163873	1	37261128	37499730	704	94	145390	2.6741	0.003747	GRIK3	0.0481655	FIS1
ENSG00000163874	1	37940153	37949980	22	11	145015	1.2935	0.097913	ZC3H12A	0.316267	FIS1
ENSG00000163875	1	37958176	37980375	90	19	145784	1.0584	0.14494	MEAF6	0.38455	FIS1
ENSG00000163877	1	38000050	38019903	62	17	146089	0.72816	0.23326	SNIP1	0.484947	FIS1
ENSG00000163879	1	38022520	38032458	45	15	146254	1.3733	0.084823	DNALI1	0.29421	FIS1
ENSG00000134697	1	38032417	38061536	91	21	146174	1.1744	0.12012	GNL2	0.351197	FIS1
ENSG00000169218	1	38076951	38100595	90	21	145351	0.70718	0.23973	RSPO1	0.492385	FIS1
ENSG00000116922	1	38147242	38157914	43	8	146134	0.34419	0.36535	C1orf109	0.600857	FIS1
ENSG00000134690	1	38158090	38175391	64	15	146062	0.34476	0.36514	CDCA8	0.600704	FIS1
ENSG00000183317	1	38179552	38230805	229	31	145995	0.82712	0.20408	EPHA10	0.455235	FIS1
ENSG00000185090	1	38259474	38266809	13	8	146158	1.533	0.062633	MANEAL	0.250214	FIS1
ENSG00000196449	1	38268616	38273857	13	4	146355	0.82724	0.20405	YRDC	0.455235	FIS1
ENSG00000197982	1	38272651	38275126	4	2	145839	1.1576	0.12352	C1orf122	0.355852	FIS1
ENSG00000188786	1	38275239	38325292	118	30	146184	1.8074	0.035351	MTF1	0.182958	FIS1
ENSG00000230610	1	38292232	38293886	3	2	145791	0.7815	0.21725	AL929472.1	0.468359	FIS1
ENSG00000204084	1	38326369	38412729	270	35	145967	1.4952	0.067432	INPP5B	0.258983	FIS1
ENSG00000183431	1	38422647	38456593	123	21	146078	0.85104	0.19737	SF3A3	0.448139	FIS1
ENSG00000183386	1	38462442	38471278	21	13	145538	2.1317	0.016514	FHL3	0.11829	FIS1
ENSG00000183520	1	38474930	38490496	43	21	145198	1.3956	0.081424	UTP11L	0.287711	FIS1
ENSG00000185668	1	38509523	38512450	3	2	145579	-1.0704	0.85777	POU3F1	0.912617	FIS1
ENSG00000116954	1	39303870	39325495	66	19	145945	0.23039	0.40889	RRAGC	0.632947	FIS1
ENSG00000214114	1	39328636	39347289	67	18	145904	-0.79527	0.78677	MYCBP	0.86976	FIS1
ENSG00000131233	1	39330175	39347289	62	16	145948	-0.66291	0.74631	GJA9	0.847374	FIS1
ENSG00000158315	1	39351479	39407471	217	40	145712	-1.2461	0.89363	RHBDL2	0.93291	FIS1
ENSG00000174574	1	39456895	39471731	58	10	145826	-0.37697	0.6469	AKIRIN1	0.787183	FIS1
ENSG00000168653	1	39491990	39500308	31	6	146094	0.84298	0.19962	NDUFS5	0.449907	FIS1
ENSG00000127603	1	39546988	39952849	1155	48	146062	0.58424	0.27953	MACF1	0.529577	FIS1
ENSG00000255103	1	39876151	39882154	16	8	146336	1.6785	0.046621	KIAA0754	0.212482	FIS1
ENSG00000183682	1	39957318	39991607	89	23	146000	-0.20783	0.58232	BMP8A	0.748947	FIS1
ENSG00000090621	1	40026488	40042462	53	19	146231	-0.19289	0.57648	PABPC4	0.745011	FIS1
ENSG00000163909	1	40089825	40105617	55	25	144204	1.2081	0.1135	HEYL	0.341186	FIS1
ENSG00000116981	1	40124793	40137710	21	8	145800	0.55665	0.28888	NT5C1A	0.538597	FIS1
ENSG00000116983	1	40144320	40157361	81	16	145392	-0.069292	0.52762	HPCAL4	0.713124	FIS1
ENSG00000084072	1	40157854	40229586	254	46	145439	-0.40145	0.65596	PPIE	0.79296	FIS1
ENSG00000116985	1	40222854	40254533	107	20	145674	-0.80166	0.78862	BMP8B	0.871143	FIS1
ENSG00000043514	1	40306723	40349183	156	23	146284	1.6181	0.052824	TRIT1	0.227717	FIS1
ENSG00000116990	1	40361098	40367928	17	9	145864	1.6893	0.045581	MYCL	0.210617	FIS1
ENSG00000168389	1	40420802	40435638	29	15	145258	0.64033	0.26098	MFSD2A	0.512866	FIS1
ENSG00000131236	1	40505905	40538321	144	15	146210	1.773	0.038113	CAP1	0.190122	FIS1
ENSG00000131238	1	40538379	40563375	111	16	146061	1.5969	0.05515	PPT1	0.233591	FIS1
ENSG00000117000	1	40627045	40706593	152	37	145990	0.93497	0.1749	RLF	0.423924	FIS1
ENSG00000188800	1	40711619	40717363	13	9	145837	1.265	0.10293	TMCO2	0.324053	FIS1
ENSG00000084073	1	40723779	40759856	67	24	146037	1.873	0.030537	ZMPSTE24	0.169266	FIS1
ENSG00000049089	1	40766159	40783488	77	16	145833	1.2437	0.1068	COL9A2	0.330124	FIS1
ENSG00000084070	1	40810522	40888998	235	47	145511	-0.90733	0.81788	SMAP2	0.889703	FIS1
ENSG00000187801	1	40915774	40929390	65	23	145654	-0.79239	0.78593	ZFP69B	0.869493	FIS1
ENSG00000187815	1	40942887	40962015	57	14	146084	-1.1699	0.87898	ZFP69	0.92412	FIS1
ENSG00000164002	1	40974413	40982228	32	10	146361	-1.6927	0.95475	EXO5	0.969944	FIS1
ENSG00000117010	1	40997233	41013841	67	12	146289	-0.71363	0.76227	ZNF684	0.857219	FIS1
ENSG00000117016	1	41086351	41131329	155	29	146095	-0.43434	0.66798	RIMS3	0.800847	FIS1
ENSG00000066136	1	41157320	41237275	253	25	146205	0.31458	0.37654	NFYC	0.610267	FIS1
ENSG00000117013	1	41249684	41306124	191	50	145103	2.0216	0.021607	KCNQ4	0.13859	FIS1
ENSG00000179862	1	41326729	41328018	10	4	146207	1.5327	0.06267	CITED4	0.250254	FIS1
ENSG00000171793	1	41445007	41478235	109	26	145595	4.0687	2.3638e-05	CTPS1	0.00134133	FIS1
ENSG00000171790	1	41481269	41488909	40	15	146231	3.4844	0.00024666	SLFNL1	0.00701941	FIS1
ENSG00000010803	1	41492872	41707826	662	36	146222	3.7952	7.3755e-05	SCMH1	0.00304296	FIS1
ENSG00000204060	1	41827594	41849262	74	19	145196	5.0228	2.546e-07	FOXO6	3.94338e-05	FIS1
ENSG00000127129	1	41944446	41950344	24	9	145163	0.069576	0.47227	EDN2	0.676589	FIS1
ENSG00000127124	1	41972036	42501596	1853	97	145821	0.83527	0.20178	HIVEP3	0.452669	FIS1
ENSG00000044012	1	42619092	42621495	10	5	146028	0.17001	0.4325	GUCA2B	0.649179	FIS1
ENSG00000197273	1	42628362	42630389	6	4	146199	-0.17701	0.57025	GUCA2A	0.740682	FIS1
ENSG00000198815	1	42642210	42801548	399	28	146177	0.2053	0.41867	FOXJ3	0.639696	FIS1
ENSG00000177181	1	42846466	42888249	174	15	145523	-0.68432	0.75311	RIMKLA	0.851796	FIS1
ENSG00000066185	1	42896000	42921938	104	13	146248	-1.0761	0.85907	ZMYND12	0.913337	FIS1
ENSG00000127125	1	42921788	42939056	42	7	146325	-0.9373	0.8257	PPCS	0.893559	FIS1
ENSG00000186409	1	42929001	43120335	698	31	146002	-0.683	0.7527	CCDC30	0.851547	FIS1
ENSG00000171960	1	43124096	43142429	42	13	146013	-0.44306	0.67114	PPIH	0.802936	FIS1
ENSG00000065978	1	43148098	43168020	48	18	145930	-1.089	0.86192	YBX1	0.914477	FIS1
ENSG00000164007	1	43198764	43205925	23	8	146306	1.2782	0.10059	CLDN19	0.320856	FIS1
ENSG00000117385	1	43212006	43232755	63	22	145916	0.78316	0.21677	LEPRE1	0.467985	FIS1
ENSG00000164008	1	43232940	43263968	82	24	145960	0.67701	0.2492	C1orf50	0.501372	FIS1
ENSG00000177868	1	43272723	43282954	38	14	146071	0.58268	0.28005	CCDC23	0.53019	FIS1
ENSG00000164010	1	43282795	43310660	79	27	145683	0.74322	0.22867	ERMAP	0.479892	FIS1
ENSG00000164011	1	43312280	43318148	12	6	146283	0.80069	0.21165	ZNF691	0.462546	FIS1
ENSG00000117394	1	43391052	43424530	152	24	145924	0.55514	0.2894	SLC2A1	0.539072	FIS1
ENSG00000186973	1	43610824	43622067	58	13	146204	-0.24951	0.59852	FAM183A	0.75873	FIS1
ENSG00000117395	1	43629846	43736607	501	47	146059	1.017	0.15459	EBNA1BP2	0.397217	FIS1
ENSG00000243710	1	43637820	43720029	389	37	146041	1.0004	0.15855	WDR65	0.402142	FIS1
ENSG00000179178	1	43735665	43739673	14	9	145892	0.81793	0.2067	TMEM125	0.458311	FIS1
ENSG00000253313	1	43747554	43751288	7	4	144745	-0.046501	0.51854	C1orf210	0.707461	FIS1
ENSG00000066056	1	43766664	43788779	43	10	145819	3.1639	0.00077827	TIE1	0.0161017	FIS1
ENSG00000117400	1	43803478	43818443	21	8	146119	2.9854	0.0014161	MPL	0.0244818	FIS1
ENSG00000117399	1	43824626	43828874	8	5	146378	3.1853	0.00072293	CDC20	0.0152461	FIS1
ENSG00000066322	1	43829068	43833696	9	6	145706	2.0504	0.020164	ELOVL1	0.133456	FIS1
ENSG00000159479	1	43849588	43855479	7	4	146111	2.324	0.010062	MED8	0.0886394	FIS1
ENSG00000198198	1	43855553	43918321	141	22	146156	3.8147	6.8163e-05	SZT2	0.00287438	FIS1
ENSG00000178922	1	43916824	43919660	10	5	146233	3.3727	0.00037211	HYI	0.00952624	FIS1
ENSG00000142949	1	43990858	44089343	330	29	145961	5.4706	2.243e-08	PTPRF	4.76222e-06	FIS1
ENSG00000066135	1	44115829	44171186	137	33	145916	6.3081	1.412e-10	KDM4A	8.0852e-08	FIS1
ENSG00000126091	1	44171495	44396831	676	46	146025	7.2938	1.5072e-13	ST3GAL3	2.03429e-10	FIS1
ENSG00000117407	1	44398992	44402913	14	6	146074	4.9567	3.5851e-07	ARTN	5.15675e-05	FIS1
ENSG00000117408	1	44412611	44433694	40	8	145835	4.7321	1.1108e-06	IPO13	0.00013037	FIS1
ENSG00000132768	1	44435672	44439041	5	2	146007	3.1367	0.00085417	DPH2	0.0171524	FIS1
ENSG00000117410	1	44440159	44443967	11	6	146177	5.8204	2.9352e-09	ATP6V0B	9.9042e-07	FIS1
ENSG00000117411	1	44444615	44456840	31	13	145695	4.539	2.8267e-06	B4GALT2	0.00026976	FIS1
ENSG00000159214	1	44457031	44462200	12	5	145410	4.0583	2.4712e-05	CCDC24	0.0013939	FIS1
ENSG00000196517	1	44457172	44497139	116	28	145691	3.1554	0.00080128	SLC6A9	0.0163989	FIS1
ENSG00000171872	1	44584522	44600812	60	17	145844	1.4913	0.067945	KLF17	0.260002	FIS1
ENSG00000178028	1	44679127	44686353	18	10	146111	1.023	0.15315	DMAP1	0.395507	FIS1
ENSG00000117419	1	44686742	44820932	304	33	146021	1.2102	0.1131	ERI3	0.340417	FIS1
ENSG00000187147	1	44870866	45117396	874	109	145314	1.9368	0.026387	RNF220	0.156157	FIS1
ENSG00000126106	1	45100910	45140227	147	22	145903	0.87611	0.19048	TMEM53	0.441292	FIS1
ENSG00000198520	1	45140364	45191263	182	65	145590	1.116	0.13221	C1orf228	0.367713	FIS1
ENSG00000142945	1	45205490	45233439	102	24	146179	1.1305	0.12913	KIF2C	0.363237	FIS1
ENSG00000142937	1	45240923	45244451	12	8	145532	0.95373	0.17011	RPS8	0.418322	FIS1
ENSG00000142959	1	45249257	45253377	3	1	146206	-0.82239	0.79457	BEST4	0.874611	FIS1
ENSG00000173846	1	45265897	45271662	19	7	146156	1.7956	0.036278	PLK3	0.185423	FIS1
ENSG00000188396	1	45271585	45272957	7	4	145699	1.6534	0.049128	TCTEX1D4	0.219079	FIS1
ENSG00000222009	1	45274154	45281257	25	9	145673	0.99038	0.16099	BTBD19	0.405934	FIS1
ENSG00000117425	1	45285516	45308735	93	22	145882	-0.49228	0.68874	PTCH2	0.813656	FIS1
ENSG00000070785	1	45316450	45452282	507	25	145821	0.43965	0.3301	EIF2B3	0.5745	FIS1
ENSG00000126107	1	45468212	45477001	36	10	146309	0.012074	0.49518	HECTD3	0.691573	FIS1
ENSG00000126088	1	45477819	45481247	14	8	146256	-0.5919	0.72304	UROD	0.833541	FIS1
ENSG00000162415	1	45482071	45771881	711	43	146045	0.44902	0.32671	ZSWIM5	0.571569	FIS1
ENSG00000132781	1	45794835	45806142	30	16	145956	1.9284	0.026902	MUTYH	0.157968	FIS1
ENSG00000132773	1	45805342	45809647	9	6	145888	0.2002	0.42066	TOE1	0.640899	FIS1
ENSG00000070759	1	45809555	45956872	351	28	145955	1.2471	0.10617	TESK2	0.329207	FIS1
ENSG00000236624	1	45959538	45965751	18	6	146182	0.59449	0.27609	CCDC163P	0.526412	FIS1
ENSG00000132763	1	45965725	45976739	28	10	146066	0.906	0.18247	MMACHC	0.432827	FIS1
ENSG00000117450	1	45976708	45988719	43	7	146237	0.52959	0.2982	PRDX1	0.546873	FIS1
ENSG00000117448	1	46016215	46035721	76	15	146088	0.040534	0.48383	AKR1A1	0.684381	FIS1
ENSG00000132780	1	46049518	46084566	135	16	146325	-0.19945	0.57905	NASP	0.747029	FIS1
ENSG00000159588	1	46085716	46089729	14	4	146332	-0.93992	0.82637	CCDC17	0.894173	FIS1
ENSG00000159592	1	46092976	46153785	200	21	146163	-0.0088387	0.50353	GPBP1L1	0.697484	FIS1
ENSG00000159596	1	46152886	46160115	22	5	145498	0.065492	0.47389	TMEM69	0.677457	FIS1
ENSG00000197429	1	46159996	46216322	161	17	145556	-0.78494	0.78376	IPP	0.869025	FIS1
ENSG00000086015	1	46252659	46501796	777	26	146255	-0.4586	0.67674	MAST2	0.805774	FIS1
ENSG00000117461	1	46505812	46642160	398	36	146102	-0.82155	0.79433	PIK3R3	0.874611	FIS1
ENSG00000117472	1	46640745	46651630	21	6	145020	0.41035	0.34077	TSPAN1	0.584001	FIS1
ENSG00000085998	1	46654354	46685977	69	18	146128	1.1305	0.12913	POMGNT1	0.363237	FIS1
ENSG00000171357	1	46669006	46686933	34	15	145903	0.96607	0.167	LURAP1	0.414125	FIS1
ENSG00000085999	1	46713360	46744145	64	26	146157	1.4599	0.072163	RAD54L	0.269042	FIS1
ENSG00000132128	1	46726868	46769280	76	33	146073	0.72401	0.23453	LRRC41	0.486677	FIS1
ENSG00000173660	1	46769303	46782448	29	13	146243	1.2618	0.1035	UQCRH	0.324797	FIS1
ENSG00000117481	1	46805849	46830824	167	5	146303	0.66341	0.25353	NSUN4	0.506042	FIS1
ENSG00000117480	1	46859937	46879520	56	20	145851	0.60369	0.27303	FAAH	0.52436	FIS1
ENSG00000197587	1	46972668	46979898	38	13	146110	0.97868	0.16387	DMBX1	0.409805	FIS1
ENSG00000162456	1	47011316	47017199	33	10	146145	0.52697	0.29911	KNCN	0.547885	FIS1
ENSG00000079277	1	47023090	47082515	183	30	145963	-0.53547	0.70384	MKNK1	0.822191	FIS1
ENSG00000142961	1	47073387	47082563	27	6	145912	-0.53608	0.70405	MOB3C	0.822335	FIS1
ENSG00000123472	1	47098409	47139539	157	15	146243	1.7712	0.038264	ATPAF1	0.190624	FIS1
ENSG00000159658	1	47124366	47184824	193	21	146117	2.6508	0.0040146	EFCAB14	0.0500875	FIS1
ENSG00000186118	1	47134527	47139266	17	8	146082	1.7241	0.042348	TEX38	0.201462	FIS1
ENSG00000142973	1	47223510	47285085	198	44	145550	0.074723	0.47022	CYP4B1	0.675276	FIS1
ENSG00000187048	1	47394849	47407156	46	12	146176	0.67325	0.25039	CYP4A11	0.502856	FIS1
ENSG00000186377	1	47427036	47516423	252	30	145834	0.99268	0.16043	CYP4X1	0.405008	FIS1
ENSG00000186160	1	47533160	47583991	142	11	145838	0.58261	0.28008	CYP4Z1	0.530194	FIS1
ENSG00000162365	1	47603107	47615413	54	10	146088	0.39594	0.34608	CYP4A22	0.587945	FIS1
ENSG00000162366	1	47649265	47656716	16	9	145621	1.5273	0.063341	PDZK1IP1	0.251626	FIS1
ENSG00000162367	1	47681962	47697892	50	15	146021	4.1043	2.0277e-05	TAL1	0.00122758	FIS1
ENSG00000123473	1	47715811	47779819	217	21	146277	1.2636	0.10319	STIL	0.324362	FIS1
ENSG00000162368	1	47799469	47844511	166	22	146065	1.4468	0.073971	CMPK1	0.272645	FIS1
ENSG00000186790	1	47881744	47883723	5	3	146046	2.0424	0.020558	FOXE3	0.135057	FIS1
ENSG00000186564	1	47901689	47906363	11	6	146249	1.5553	0.059939	FOXD2	0.243991	FIS1
ENSG00000269113	1	48226200	48462567	840	53	145689	0.64672	0.25891	TRABD2B	0.511365	FIS1
ENSG00000273395	1	48226979	48227290	2	1	144121	1.3363	0.090724	FLJ00388	0.305365	FIS1
ENSG00000269709	1	48569306	48569878	1	1	145916	0.069726	0.47221	AL109659.1	0.676589	FIS1
ENSG00000117834	1	48688357	48714316	72	18	146105	-0.61013	0.72911	SLC5A9	0.837218	FIS1
ENSG00000132122	1	48761044	48937845	429	46	145862	-0.59104	0.72275	SPATA6	0.833359	FIS1
ENSG00000186094	1	48998527	50489585	3439	98	145822	-0.80368	0.78921	AGBL4	0.871489	FIS1
ENSG00000162373	1	49193195	49242641	109	27	145496	-0.39866	0.65493	BEND5	0.792285	FIS1
ENSG00000227839	1	50459990	50461874	3	2	146156	0.55978	0.28781	AL645730.2	0.537344	FIS1
ENSG00000162374	1	50513686	50669458	323	55	145816	0.28988	0.38595	ELAVL4	0.616295	FIS1
ENSG00000142700	1	50883222	50889172	5	3	145451	1.7894	0.036774	DMRTA2	0.186867	FIS1
ENSG00000185104	1	50905150	51425935	1091	50	146145	0.20221	0.41988	FAF1	0.640302	FIS1
ENSG00000123080	1	51426417	51440305	25	12	145995	0.89919	0.18428	CDKN2C	0.434898	FIS1
ENSG00000204006	1	51567906	51613752	139	23	146230	2.7297	0.0031699	C1orf185	0.0432168	FIS1
ENSG00000123091	1	51701943	51739127	125	11	146234	2.8126	0.0024573	RNF11	0.0364754	FIS1
ENSG00000085831	1	51752930	51810788	188	41	146016	2.9671	0.0015033	TTC39A	0.0255453	FIS1
ENSG00000085832	1	51819935	51985000	589	25	146327	3.3092	0.00046781	EPS15	0.0111192	FIS1
ENSG00000117859	1	52042851	52254889	486	49	146005	1.6156	0.053092	OSBPL9	0.228577	FIS1
ENSG00000078618	1	52254863	52344477	255	27	145941	1.5083	0.065742	NRD1	0.255913	FIS1
ENSG00000169213	1	52373628	52456436	244	32	145904	1.8336	0.033358	RAB3B	0.177359	FIS1
ENSG00000117862	1	52485803	52521843	92	17	145891	1.8659	0.03103	TXNDC12	0.170647	FIS1
ENSG00000198841	1	52497775	52499488	5	2	146242	-0.63174	0.73622	KTI12	0.841406	FIS1
ENSG00000134717	1	52521797	52556388	83	21	145819	2.7103	0.003361	BTF3L4	0.0447881	FIS1
ENSG00000157077	1	52608046	52812358	472	40	146107	2.6666	0.0038311	ZFYVE9	0.0488644	FIS1
ENSG00000154222	1	52811395	52831865	58	24	146117	2.6825	0.0036539	CC2D1B	0.0474204	FIS1
ENSG00000085840	1	52838501	52870131	63	21	145892	2.7629	0.0028649	ORC1	0.0404295	FIS1
ENSG00000134748	1	52870236	52886511	26	12	145539	1.4619	0.071887	PRPF38A	0.268588	FIS1
ENSG00000134744	1	52873954	53019159	334	30	145756	2.4901	0.0063856	ZCCHC11	0.0666556	FIS1
ENSG00000116157	1	53068044	53074723	26	8	146030	1.3954	0.081444	GPX7	0.287711	FIS1
ENSG00000182183	1	53099016	53135355	112	30	145377	1.0466	0.14764	FAM159A	0.387904	FIS1
ENSG00000162377	1	53152508	53164038	40	12	145565	-0.083561	0.5333	COA7	0.717198	FIS1
ENSG00000162378	1	53192126	53293014	359	27	145883	0.74501	0.22813	ZYG11B	0.479291	FIS1
ENSG00000203995	1	53308183	53360670	175	22	145932	0.65161	0.25733	ZYG11A	0.509804	FIS1
ENSG00000121310	1	53361656	53392884	59	19	146027	1.1255	0.13019	ECHDC2	0.364919	FIS1
ENSG00000116171	1	53392901	53517375	583	32	145871	-0.66289	0.7463	SCP2	0.847374	FIS1
ENSG00000174348	1	53527854	53551174	135	20	145827	-1.0162	0.84522	PODN	0.904991	FIS1
ENSG00000162383	1	53552855	53608289	343	49	145665	1.1463	0.12584	SLC1A7	0.359278	FIS1
ENSG00000157184	1	53662101	53679869	36	10	146015	2.0801	0.018756	CPT2	0.127947	FIS1
ENSG00000162384	1	53679771	53686289	17	6	146250	2.852	0.0021724	C1orf123	0.0334918	FIS1
ENSG00000162385	1	53692564	53704282	33	11	145760	2.6989	0.0034783	MAGOH	0.0459386	FIS1
ENSG00000157193	1	53711217	53793742	274	41	145740	2.7061	0.0034042	LRP8	0.0451726	FIS1
ENSG00000143006	1	53925072	53933161	36	11	146037	-1.0768	0.85922	DMRTB1	0.913337	FIS1
ENSG00000174332	1	53971910	54199877	908	76	145658	0.75819	0.22417	GLIS1	0.475113	FIS1
ENSG00000058804	1	54231133	54304533	202	28	145861	0.56756	0.28517	NDC1	0.534978	FIS1
ENSG00000058799	1	54317392	54356407	154	18	146039	-0.5498	0.70877	YIPF1	0.82466	FIS1
ENSG00000211452	1	54356912	54376759	88	13	146068	-0.1514	0.56017	DIO1	0.734079	FIS1
ENSG00000081870	1	54382247	54411602	83	12	146009	1.796	0.036245	HSPB11	0.185423	FIS1
ENSG00000116212	1	54411750	54433841	59	22	145927	0.8268	0.20418	LRRC42	0.455404	FIS1
ENSG00000203985	1	54474412	54483856	32	7	145663	-0.50977	0.69489	LDLRAD1	0.817012	FIS1
ENSG00000116209	1	54497347	54519177	61	17	146008	0.10578	0.45788	TMEM59	0.665854	FIS1
ENSG00000116205	1	54519260	54578192	182	29	146101	0.085346	0.46599	TCEANC2	0.67176	FIS1
ENSG00000212670	1	54569968	54571750	4	2	146012	1.088	0.13831	AL161915.1	0.376044	FIS1
ENSG00000157211	1	54598747	54619443	106	22	145198	0.58276	0.28003	CDCP2	0.53019	FIS1
ENSG00000256407	1	54606897	54665746	235	47	145414	0.29655	0.38341	RP11-446E24.4	0.614601	FIS1
ENSG00000248835	1	54635333	54637997	15	6	146102	-1.0769	0.85925	AL357673.1	0.913337	FIS1
ENSG00000215883	1	54638009	54665709	90	25	145708	0.56544	0.28589	CYB5RL	0.535293	FIS1
ENSG00000116221	1	54649714	54691137	162	39	146018	0.54883	0.29156	MRPL37	0.541137	FIS1
ENSG00000157216	1	54691105	54879152	694	121	145672	1.0565	0.14537	SSBP3	0.385153	FIS1
ENSG00000198711	1	54703710	54704736	6	4	144732	-0.26274	0.60363	SSBP3-AS1	0.76158	FIS1
ENSG00000162390	1	55007930	55104865	476	53	145790	1.0156	0.15491	ACOT11	0.397499	FIS1
ENSG00000162391	1	55074855	55089229	57	18	145645	-0.34445	0.63474	FAM151A	0.780304	FIS1
ENSG00000271723	1	55107459	55207981	509	52	145626	-0.6221	0.73306	MROH7-TTC4	0.839509	FIS1
ENSG00000184313	1	55107463	55175939	294	51	145338	0.071958	0.47132	MROH7	0.676082	FIS1
ENSG00000243725	1	55181495	55208330	187	9	146037	-1.1263	0.86998	TTC4	0.919078	FIS1
ENSG00000162396	1	55222571	55230187	32	9	146228	-0.1972	0.57816	PARS2	0.746441	FIS1
ENSG00000006555	1	55245385	55266940	84	19	145273	-1.156	0.87615	TTC22	0.922479	FIS1
ENSG00000162398	1	55271736	55307925	177	18	144911	-1.8523	0.96801	C1orf177	0.978679	FIS1
ENSG00000116133	1	55315306	55352891	162	25	145800	0.25694	0.39861	DHCR24	0.626024	FIS1
ENSG00000143001	1	55446465	55457966	53	8	145695	0.25819	0.39813	TMEM61	0.625671	FIS1
ENSG00000162399	1	55464606	55476556	51	16	145418	0.56423	0.2863	BSND	0.535795	FIS1
ENSG00000169174	1	55505221	55530525	132	31	145646	-1.157	0.87637	PCSK9	0.922608	FIS1
ENSG00000162402	1	55532032	55680786	433	46	146126	0.05672	0.47738	USP24	0.679721	FIS1
ENSG00000162407	1	56960419	57110974	581	61	145295	1.5715	0.058029	PPAP2B	0.239938	FIS1
ENSG00000162409	1	57110995	57181008	297	23	145939	0.74578	0.2279	PRKAA2	0.478968	FIS1
ENSG00000187889	1	57184477	57285369	418	68	145293	2.6208	0.0043861	C1orf168	0.0532217	FIS1
ENSG00000157131	1	57320479	57383894	306	37	146087	2.5639	0.0051749	C8A	0.059156	FIS1
ENSG00000021852	1	57394883	57431813	166	37	145868	-1.2549	0.89525	C8B	0.933724	FIS1
ENSG00000173406	1	57460451	59012406	6118	335	145725	2.1933	0.014143	DAB1	0.109066	FIS1
ENSG00000162600	1	58881056	59012474	593	53	145958	-0.31252	0.62268	OMA1	0.773437	FIS1
ENSG00000184292	1	59041099	59043166	13	4	146377	-0.089599	0.5357	TACSTD2	0.718619	FIS1
ENSG00000162601	1	59120411	59165764	206	18	146071	0.26449	0.3957	MYSM1	0.624152	FIS1
ENSG00000177606	1	59246465	59249785	4	2	145802	2.4293	0.0075634	JUN	0.0735282	FIS1
ENSG00000172456	1	59762310	60233347	1343	112	145773	0.50505	0.30676	FGGY	0.554533	FIS1
ENSG00000134709	1	60280458	60342050	188	34	145489	0.97549	0.16466	HOOK1	0.411094	FIS1
ENSG00000134716	1	60358980	60392462	89	19	146014	0.61287	0.26998	CYP2J2	0.521523	FIS1
ENSG00000162598	1	60452941	60539442	263	44	145809	-0.17568	0.56973	C1orf87	0.740312	FIS1
ENSG00000162599	1	61330931	61928465	2109	240	145656	2.5349	0.005624	NFIA	0.0623657	FIS1
ENSG00000162604	1	62146718	62191095	150	24	145723	0.23039	0.40889	TM2D1	0.632947	FIS1
ENSG00000132849	1	62208149	62629592	1741	134	145418	0.7827	0.2169	INADL	0.468105	FIS1
ENSG00000240563	1	62660503	62678000	124	23	146116	0.32836	0.37132	L1TD1	0.606541	FIS1
ENSG00000132854	1	62702651	62785085	414	36	145516	-0.31172	0.62237	KANK4	0.773297	FIS1
ENSG00000162607	1	62901968	62917475	42	7	145505	2.7233	0.0032321	USP1	0.0436865	FIS1
ENSG00000116641	1	62920399	63153969	497	30	145961	2.8437	0.0022296	DOCK7	0.0341337	FIS1
ENSG00000132855	1	63063158	63071830	11	6	145705	1.5572	0.05971	ANGPTL3	0.243636	FIS1
ENSG00000269624	1	63073437	63075249	3	1	146195	2.8297	0.0023298	AL138847.1	0.0352473	FIS1
ENSG00000125703	1	63249806	63331184	232	23	145573	2.0804	0.018746	ATG4C	0.127947	FIS1
ENSG00000187140	1	63788730	63790797	5	3	144532	0.13288	0.44714	FOXD3	0.658929	FIS1
ENSG00000088035	1	63833261	63904233	211	33	145630	0.67977	0.24833	ALG6	0.501028	FIS1
ENSG00000142856	1	63906441	64059392	458	32	146136	0.95234	0.17046	ITGB3BP	0.418327	FIS1
ENSG00000203965	1	63989043	64038364	145	19	146285	0.98153	0.16317	EFCAB7	0.409138	FIS1
ENSG00000116652	1	64014588	64015405	2	1	146449	0.14591	0.44199	DLEU2L	0.655789	FIS1
ENSG00000079739	1	64058947	64125916	261	47	145662	1.3458	0.089182	PGM1	0.30291	FIS1
ENSG00000185483	1	64239693	64647181	1351	117	145351	0.68074	0.24802	ROR1	0.500757	FIS1
ENSG00000177414	1	64669310	64733051	206	28	145115	0.25107	0.40088	UBE2U	0.62769	FIS1
ENSG00000158966	1	64936428	65158741	642	98	145597	-0.33264	0.6303	CACHD1	0.777171	FIS1
ENSG00000162437	1	65210778	65298915	221	32	145944	2.2719	0.011548	RAVER2	0.0974156	FIS1
ENSG00000162434	1	65298912	65432187	480	46	145757	2.5878	0.0048297	JAK1	0.056474	FIS1
ENSG00000162433	1	65613232	65697828	258	31	145191	1.6114	0.053546	AK4	0.229511	FIS1
ENSG00000116675	1	65713902	65881552	566	40	145673	0.96591	0.16705	DNAJC6	0.41414	FIS1
ENSG00000116678	1	65886248	66107242	712	42	145779	3.3189	0.0004519	LEPR	0.0108698	FIS1
ENSG00000213625	1	65886270	65901690	57	17	145569	2.62	0.0043959	LEPROT	0.0532468	FIS1
ENSG00000184588	1	66258197	66840259	1865	119	145609	0.68439	0.24686	PDE4B	0.499643	FIS1
ENSG00000118473	1	66999066	67213982	889	31	145804	1.6533	0.049135	SGIP1	0.219079	FIS1
ENSG00000248458	1	67131547	67142710	39	11	145821	1.3757	0.08445	AL139147.1	0.293686	FIS1
ENSG00000152760	1	67218142	67244470	96	16	145525	1.4614	0.071947	TCTEX1D1	0.268625	FIS1
ENSG00000172410	1	67263424	67266939	12	5	145625	-0.75796	0.77576	INSL5	0.864897	FIS1
ENSG00000152763	1	67278568	67390570	288	39	145650	-1.0871	0.86151	WDR78	0.914248	FIS1
ENSG00000198160	1	67390578	67454302	175	22	146041	-0.31891	0.6251	MIER1	0.774039	FIS1
ENSG00000116704	1	67465015	67519782	204	24	145908	-0.40753	0.65819	SLC35D1	0.794554	FIS1
ENSG00000203963	1	67557848	67697536	540	43	145852	-1.5071	0.9341	C1orf141	0.957407	FIS1
ENSG00000162594	1	67632083	67725662	330	41	145667	-0.98639	0.83803	IL23R	0.901019	FIS1
ENSG00000081985	1	67773047	67862583	304	25	145807	0.41239	0.34003	IL12RB2	0.583311	FIS1
ENSG00000142864	1	67873493	67896098	40	16	145582	0.38007	0.35195	SERBP1	0.591641	FIS1
ENSG00000116717	1	68150744	68154021	10	4	145570	2.6492	0.0040336	GADD45A	0.0502012	FIS1
ENSG00000172380	1	68167149	68299150	458	55	145814	2.2647	0.011765	GNG12	0.0984195	FIS1
ENSG00000162595	1	68511645	68517314	18	7	145543	-0.77909	0.78204	DIRAS3	0.868204	FIS1
ENSG00000116729	1	68564142	68698803	649	88	145657	1.0144	0.1552	WLS	0.397811	FIS1
ENSG00000116745	1	68894505	68915642	80	16	145398	1.0409	0.14897	RPE65	0.389658	FIS1
ENSG00000024526	1	68939835	68962904	75	12	145977	0.37321	0.3545	DEPDC1	0.593394	FIS1
ENSG00000033122	1	70034081	70617628	2030	104	145679	2.4425	0.0072925	LRRC7	0.0718471	FIS1
ENSG00000066557	1	70610488	70671303	142	27	145871	1.9837	0.023644	LRRC40	0.14599	FIS1
ENSG00000116754	1	70671365	70718735	104	21	146040	0.837	0.2013	SRSF11	0.452022	FIS1
ENSG00000118454	1	70726271	70820417	228	46	145504	1.3391	0.090275	ANKRD13C	0.30496	FIS1
ENSG00000197568	1	70820488	70851022	88	19	146114	1.102	0.13523	HHLA3	0.372214	FIS1
ENSG00000116761	1	70876901	70905534	99	28	145355	0.92324	0.17794	CTH	0.427014	FIS1
ENSG00000050628	1	71318036	71513491	716	58	145748	2.5451	0.0054627	PTGER3	0.0612601	FIS1
ENSG00000132485	1	71528974	71546980	44	15	146021	0.89979	0.18412	ZRANB2	0.434898	FIS1
ENSG00000172260	1	71861623	72748417	2492	136	145805	6.2144	2.5764e-10	NEGR1	1.2483e-07	FIS1
ENSG00000162620	1	74491699	74663871	408	36	145853	0.6981	0.24256	LRRIQ3	0.495	FIS1
ENSG00000254685	1	74663896	74699770	120	14	146158	2.0752	0.018984	FPGT	0.128805	FIS1
ENSG00000259030	1	74663919	75009666	936	89	145723	3.331	0.00043265	FPGT-TNNI3K	0.0105099	FIS1
ENSG00000116783	1	74663947	75010112	936	89	145723	3.331	0.00043265	TNNI3K	0.0105099	FIS1
ENSG00000162621	1	74935562	74978298	98	15	145845	0.63975	0.26117	LRRC53	0.513093	FIS1
ENSG00000178965	1	75033795	75139422	249	39	145586	0.57719	0.28191	C1orf173	0.531899	FIS1
ENSG00000116791	1	75171170	75199092	110	29	145893	2.3845	0.0085523	CRYZ	0.0797258	FIS1
ENSG00000162623	1	75198836	75232362	137	22	146016	2.6195	0.0044032	TYW3	0.053301	FIS1
ENSG00000162624	1	75594119	75627218	93	24	145583	3.0833	0.0010236	LHX8	0.0194644	FIS1
ENSG00000137968	1	75667816	76076801	1423	70	145757	0.99452	0.15998	SLC44A5	0.404521	FIS1
ENSG00000117054	1	76190036	76253260	293	22	146089	-0.43781	0.66924	ACADM	0.802052	FIS1
ENSG00000137955	1	76251879	76260764	24	9	146223	-0.23282	0.59205	RABGGTB	0.753981	FIS1
ENSG00000057468	1	76262567	76378923	494	33	146203	0.042529	0.48304	MSH4	0.683761	FIS1
ENSG00000154007	1	76384558	76398116	64	15	146120	-0.84847	0.80191	ASB17	0.87955	FIS1
ENSG00000184005	1	76540404	77100286	2120	186	145510	3.2311	0.00061667	ST6GALNAC3	0.0135338	FIS1
ENSG00000117069	1	77333126	77531396	649	62	145723	0.59488	0.27596	ST6GALNAC5	0.526353	FIS1
ENSG00000142892	1	77554675	77685115	446	33	145746	0.029836	0.4881	PIGK	0.686784	FIS1
ENSG00000154027	1	77747736	78025651	1265	92	145940	0.22071	0.41266	AK5	0.635439	FIS1
ENSG00000036549	1	78028101	78149104	280	32	146082	1.8714	0.030645	ZZZ3	0.169627	FIS1
ENSG00000077254	1	78161672	78225537	141	38	146125	2.4725	0.0067092	USP33	0.0684541	FIS1
ENSG00000180488	1	78245309	78344106	236	51	145985	2.9816	0.0014337	FAM73A	0.0246957	FIS1
ENSG00000162614	1	78354198	78409580	147	35	146070	2.0865	0.018469	NEXN	0.126952	FIS1
ENSG00000162613	1	78409740	78444794	88	19	146290	1.4802	0.069406	FUBP1	0.262807	FIS1
ENSG00000162616	1	78444859	78483648	123	34	146084	1.839	0.032956	DNAJB4	0.176669	FIS1
ENSG00000137960	1	78445226	78604133	500	56	145918	1.655	0.048961	GIPC2	0.21857	FIS1
ENSG00000122420	1	78769568	79005434	867	75	145741	1.4934	0.067668	PTGFR	0.259309	FIS1
ENSG00000137959	1	79085607	79111830	79	22	145997	0.74779	0.22729	IFI44L	0.478431	FIS1
ENSG00000137965	1	79115481	79129763	33	10	145895	0.12207	0.45142	IFI44	0.661602	FIS1
ENSG00000162618	1	79355449	79472403	597	32	145671	-0.68674	0.75388	ELTD1	0.8524	FIS1
ENSG00000117114	1	81771845	82458120	2970	209	145751	3.1504	0.00081511	LPHN2	0.0165261	FIS1
ENSG00000137941	1	84330711	84464833	428	22	146131	1.4273	0.076746	TTLL7	0.277868	FIS1
ENSG00000142875	1	84543745	84704181	344	37	145707	0.71443	0.23748	PRKACB	0.490071	FIS1
ENSG00000203943	1	84764049	84855640	280	35	145775	0.67546	0.24969	SAMD13	0.50201	FIS1
ENSG00000137976	1	84864215	84880701	84	15	145943	0.53942	0.2948	DNASE2B	0.543255	FIS1
ENSG00000117133	1	84944942	84963473	100	23	146250	-0.25315	0.59992	RPF1	0.759384	FIS1
ENSG00000174021	1	84964008	84972248	31	10	146357	0.10612	0.45774	GNG5	0.665796	FIS1
ENSG00000117151	1	85015289	85040163	93	20	146084	-0.49787	0.69071	CTBS	0.814593	FIS1
ENSG00000180869	1	85093913	85100703	22	10	145994	1.0894	0.138	C1orf180	0.375662	FIS1
ENSG00000117155	1	85109390	85156486	155	25	146078	1.8388	0.032974	SSX2IP	0.176669	FIS1
ENSG00000171517	1	85277285	85358896	346	68	145152	-0.069517	0.52771	LPAR3	0.713124	FIS1
ENSG00000153898	1	85391268	85462796	304	31	145880	0.029316	0.48831	MCOLN2	0.68695	FIS1
ENSG00000162643	1	85464830	85598821	458	54	145662	-0.090913	0.53622	WDR63	0.718906	FIS1
ENSG00000055732	1	85483765	85514182	81	21	145842	-1.2017	0.88526	MCOLN3	0.927729	FIS1
ENSG00000097096	1	85622556	85666729	152	22	145852	0.10813	0.45695	SYDE2	0.665181	FIS1
ENSG00000162642	1	85715639	85725355	36	15	146048	1.206	0.1139	C1orf52	0.341845	FIS1
ENSG00000142867	1	85731931	85742773	45	16	146172	1.4014	0.080553	BCL10	0.2859	FIS1
ENSG00000153904	1	85784164	86043933	921	85	145614	0.4657	0.32071	DDAH1	0.566421	FIS1
ENSG00000142871	1	86046444	86049645	8	5	144397	0.22564	0.41074	CYR61	0.634148	FIS1
ENSG00000117174	1	86115106	86174116	177	37	146064	-0.083812	0.5334	ZNHIT6	0.717198	FIS1
ENSG00000171502	1	86194916	86622626	1781	77	145835	-0.44099	0.67039	COL24A1	0.802718	FIS1
ENSG00000122417	1	86814344	86862023	219	29	146217	-1.1004	0.86443	ODF2L	0.915785	FIS1
ENSG00000137975	1	86889769	86922241	205	29	145885	-0.53217	0.7027	CLCA2	0.821628	FIS1
ENSG00000016490	1	86934051	86965972	143	33	145217	-0.18009	0.57146	CLCA1	0.741451	FIS1
ENSG00000016602	1	87012761	87046437	94	20	145589	1.4908	0.068006	CLCA4	0.260145	FIS1
ENSG00000097033	1	87170259	87213867	135	27	146035	1.5855	0.056426	SH3GLB1	0.236058	FIS1
ENSG00000183291	1	87328132	87380107	209	25	146228	1.1062	0.13432	2025-09-15	0.370798	FIS1
ENSG00000153936	1	87380331	87602334	742	39	145983	0.74057	0.22948	HS2ST1	0.48094	FIS1
ENSG00000267561	1	87458692	87634884	593	46	145884	0.76216	0.22298	RP5-1052I5.2	0.473845	FIS1
ENSG00000143013	1	87794151	87814606	77	26	145709	3.0351	0.0012023	LMO4	0.0216988	FIS1
ENSG00000065243	1	89149905	89301938	527	19	146176	0.85286	0.19687	PKN2	0.447513	FIS1
ENSG00000137947	1	89318615	89357627	148	17	146076	0.80498	0.21041	GTF2B	0.461318	FIS1
ENSG00000137944	1	89401456	89458636	162	22	145866	2.4289	0.0075729	CCBL2	0.073572	FIS1
ENSG00000213516	1	89445139	89458643	32	21	145279	0.47643	0.31688	RBMXL1	0.563378	FIS1
ENSG00000117226	1	89472349	89488577	41	13	146068	0.11776	0.45313	GBP3	0.662785	FIS1
ENSG00000117228	1	89518002	89531043	53	12	146017	-0.70116	0.7584	GBP1	0.854596	FIS1
ENSG00000162645	1	89571815	89616139	149	18	146193	-0.38075	0.6483	GBP2	0.788357	FIS1
ENSG00000213512	1	89597434	89641723	123	22	146175	-0.51127	0.69542	GBP7	0.817436	FIS1
ENSG00000162654	1	89646831	89664615	54	17	146203	-0.2394	0.5946	GBP4	0.755637	FIS1
ENSG00000154451	1	89724633	89738544	34	14	145880	0.36667	0.35693	GBP5	0.594967	FIS1
ENSG00000183347	1	89829617	89852020	90	20	146098	-0.37483	0.64611	GBP6	0.786625	FIS1
ENSG00000197147	1	89990395	90063423	237	25	146077	0.89626	0.18506	LRRC8B	0.435913	FIS1
ENSG00000171488	1	90098631	90235462	327	27	145706	2.8068	0.0025016	LRRC8C	0.0369299	FIS1
ENSG00000271949	1	90098699	90398809	771	70	145697	3.2978	0.00048723	RP11-302M6.4	0.0114085	FIS1
ENSG00000171492	1	90286573	90402170	284	63	145506	2.73	0.0031669	LRRC8D	0.043207	FIS1
ENSG00000162664	1	90460671	90501090	94	29	145855	-0.9246	0.82241	ZNF326	0.89233	FIS1
ENSG00000143032	1	91177096	91182794	19	13	145747	0.22782	0.40989	BARHL2	0.633405	FIS1
ENSG00000122482	1	91380859	91487829	268	27	146058	1.6972	0.044834	ZNF644	0.208614	FIS1
ENSG00000162669	1	91726323	91870426	424	41	145974	0.10604	0.45777	HFM1	0.665796	FIS1
ENSG00000097046	1	91966408	91991321	62	15	146151	0.83765	0.20111	CDC7	0.451864	FIS1
ENSG00000069702	1	92145902	92371892	923	87	145538	-0.10193	0.54059	TGFBR3	0.722394	FIS1
ENSG00000137948	1	92414928	92479983	248	26	146069	1.4558	0.07273	BRDT	0.269986	FIS1
ENSG00000172031	1	92495539	92529093	103	22	145677	0.87462	0.19089	EPHX4	0.441392	FIS1
ENSG00000189195	1	92545862	92613393	205	26	145649	2.2416	0.012493	BTBD8	0.101491	FIS1
ENSG00000069712	1	92632542	92650280	46	11	145823	2.6348	0.0042092	KIAA1107	0.0517741	FIS1
ENSG00000203910	1	92683497	92711370	57	16	146091	1.541	0.061658	C1orf146	0.247733	FIS1
ENSG00000174842	1	92711959	92764544	109	23	146041	1.9532	0.025399	GLMN	0.153091	FIS1
ENSG00000122484	1	92764522	92867613	278	31	146244	2.2081	0.013617	RPAP2	0.106907	FIS1
ENSG00000162676	1	92940319	92952433	43	16	145658	1.0852	0.13891	GFI1	0.376403	FIS1
ENSG00000067208	1	92974253	93257961	921	34	146104	0.86613	0.19321	EVI5	0.444148	FIS1
ENSG00000122406	1	93297582	93307481	21	10	146116	1.087	0.13853	RPL5	0.37621	FIS1
ENSG00000154511	1	93307724	93427057	286	21	146014	1.1246	0.13038	FAM69A	0.364961	FIS1
ENSG00000143033	1	93544792	93604638	141	26	145593	1.1377	0.12763	MTF2	0.361628	FIS1
ENSG00000117500	1	93615299	93646285	78	17	146209	2.3064	0.010545	TMED5	0.0916973	FIS1
ENSG00000122483	1	93645476	93744287	285	23	146134	1.8981	0.02884	CCDC18	0.163701	FIS1
ENSG00000117505	1	93811445	93835055	65	14	146194	1.5395	0.061843	DR1	0.248106	FIS1
ENSG00000137942	1	93913688	94020218	208	52	145895	1.1584	0.12335	FNBP1L	0.355788	FIS1
ENSG00000137936	1	94027347	94312706	1121	50	145775	0.92942	0.17634	BCAR3	0.425613	FIS1
ENSG00000067334	1	94333373	94345474	55	10	146241	1.1545	0.12415	DNTTIP2	0.356558	FIS1
ENSG00000023909	1	94350761	94374966	86	20	145840	2.4832	0.0065108	GCLM	0.0673389	FIS1
ENSG00000198691	1	94458393	94586688	573	96	145673	0.61255	0.27009	ABCA4	0.52157	FIS1
ENSG00000137962	1	94614544	94740624	288	47	145648	0.56202	0.28705	ARHGAP29	0.536614	FIS1
ENSG00000117528	1	94883933	94984222	177	34	145330	0.65591	0.25594	ABCD3	0.508355	FIS1
ENSG00000117525	1	94994781	95007356	39	14	145254	-0.85937	0.80493	F3	0.881656	FIS1
ENSG00000143036	1	95285898	95360802	369	66	145478	0.79955	0.21199	SLC44A3	0.462826	FIS1
ENSG00000117519	1	95362507	95392834	146	37	145566	1.8554	0.031768	CNN3	0.173029	FIS1
ENSG00000172339	1	95439963	95538501	349	41	145932	-0.24616	0.59722	ALG14	0.757489	FIS1
ENSG00000152078	1	95582894	95663163	286	35	145779	-0.12641	0.5503	TMEM56	0.728643	FIS1
ENSG00000271092	1	95583479	95712781	471	46	145867	-0.33585	0.63151	TMEM56-RWDD3	0.778155	FIS1
ENSG00000122481	1	95699711	95712781	55	19	146023	-0.24599	0.59715	RWDD3	0.757451	FIS1
ENSG00000237435	1	96403457	96488436	373	35	145756	3.09	0.0010008	RP11-147C23.1	0.0191991	FIS1
ENSG00000117569	1	97187221	97289294	353	34	146086	1.3786	0.084016	PTBP2	0.292961	FIS1
ENSG00000188641	1	97543299	98386605	2874	176	145659	3.2612	0.0005548	DPYD	0.0124212	FIS1
ENSG00000162627	1	99127236	99226056	412	32	145954	-1.0413	0.85112	SNX7	0.908477	FIS1
ENSG00000117598	1	99355806	99470588	546	57	145944	1.0572	0.14521	LPPR5	0.384945	FIS1
ENSG00000117600	1	99729509	99775146	176	35	145919	-0.28485	0.61212	LPPR4	0.767424	FIS1
ENSG00000099260	1	100111499	100160097	200	30	145777	-0.95004	0.82895	PALMD	0.895691	FIS1
ENSG00000156869	1	100174259	100232187	276	14	146065	-0.10932	0.54353	FRRS1	0.724185	FIS1
ENSG00000162688	1	100315640	100389579	307	24	145973	-0.25462	0.60049	AGL	0.759622	FIS1
ENSG00000117620	1	100435345	100492535	201	19	146319	0.93526	0.17483	SLC35A3	0.423917	FIS1
ENSG00000156875	1	100503653	100548933	164	23	146192	0.99379	0.16016	HIAT1	0.404568	FIS1
ENSG00000156876	1	100549119	100598511	160	23	146202	0.34756	0.36409	SASS6	0.600126	FIS1
ENSG00000122435	1	100598706	100616053	56	15	146115	0.54961	0.29129	TRMT13	0.540849	FIS1
ENSG00000122477	1	100614409	100643771	81	21	146034	0.37617	0.35339	LRRC39	0.592691	FIS1
ENSG00000137992	1	100652475	100715390	162	18	146090	0.91217	0.18084	DBT	0.431132	FIS1
ENSG00000137996	1	100731763	100758325	93	14	146143	-1.3054	0.90412	RTCA	0.938437	FIS1
ENSG00000079335	1	100810584	100985833	442	41	145949	1.0609	0.14437	CDC14A	0.384065	FIS1
ENSG00000181656	1	101003693	101007574	11	5	145134	1.0581	0.145	GPR88	0.38455	FIS1
ENSG00000162692	1	101185298	101204601	42	20	145269	-0.27585	0.60867	VCAM1	0.765282	FIS1
ENSG00000162694	1	101337943	101361554	47	19	145835	0.76121	0.22327	EXTL2	0.474088	FIS1
ENSG00000162695	1	101361632	101447309	192	30	145987	1.3236	0.092817	SLC30A7	0.308889	FIS1
ENSG00000117543	1	101455179	101491644	72	15	145886	1.074	0.14141	DPH5	0.380314	FIS1
ENSG00000170989	1	101702444	101707074	11	6	145834	-0.12813	0.55098	S1PR1	0.72887	FIS1
ENSG00000118733	1	102268130	102462586	859	100	145706	-0.17059	0.56773	OLFM3	0.738882	FIS1
ENSG00000060718	1	103342023	103574052	1168	44	146102	2.8633	0.0020966	COL11A1	0.0326938	FIS1
ENSG00000185946	1	104068313	104097861	59	18	145220	-1.1133	0.86721	RNPC3	0.917257	FIS1
ENSG00000240038	1	104096437	104122156	61	32	145378	-0.76432	0.77766	AMY2B	0.865612	FIS1
ENSG00000243480	1	104159999	104168402	2	1	145446	1.6443	0.050057	AMY2A	0.221333	FIS1
ENSG00000198890	1	107599267	107601916	5	3	145988	-0.060258	0.52402	PRMT6	0.711076	FIS1
ENSG00000162631	1	107682629	108026080	1056	108	145562	-0.013538	0.5054	NTNG1	0.698552	FIS1
ENSG00000134215	1	108113782	108507766	1719	128	145753	2.1712	0.01496	VAV3	0.112938	FIS1
ENSG00000085491	1	108676658	108743471	257	23	145769	0.38132	0.35148	SLC25A24	0.591459	FIS1
ENSG00000196427	1	108765963	108786689	2	1	146451	-2.9949	0.99863	NBPF4	0.999027	FIS1
ENSG00000186086	1	108918421	109013624	3	1	146096	-0.06002	0.52393	NBPF6	0.711076	FIS1
ENSG00000162636	1	109102711	109187522	183	16	146090	-0.16263	0.5646	FAM102B	0.736533	FIS1
ENSG00000162639	1	109190912	109204148	30	16	145881	-1.0576	0.85487	HENMT1	0.911211	FIS1
ENSG00000134186	1	109234945	109244425	13	9	145539	-0.76812	0.77879	PRPF38B	0.866208	FIS1
ENSG00000143107	1	109255279	109285365	85	25	145060	0.64197	0.26045	FNDC7	0.512546	FIS1
ENSG00000116266	1	109289296	109352148	238	17	146236	-0.32426	0.62713	STXBP3	0.774982	FIS1
ENSG00000162641	1	109358520	109506106	598	39	145726	-0.033369	0.51331	AKNAD1	0.704394	FIS1
ENSG00000121957	1	109417972	109477167	193	27	146167	0.17283	0.43139	GPSM2	0.64811	FIS1
ENSG00000121940	1	109472130	109506111	137	30	145473	-0.24128	0.59533	CLCC1	0.756208	FIS1
ENSG00000085433	1	109512836	109584850	254	26	145707	-1.0721	0.85816	WDR47	0.91291	FIS1
ENSG00000197780	1	109605108	109618624	55	16	144813	0.34587	0.36472	TAF13	0.600536	FIS1
ENSG00000215717	1	109632425	109639556	30	9	145339	-1.0292	0.84831	TMEM167B	0.906933	FIS1
ENSG00000179902	1	109648573	109656479	39	11	146136	0.14739	0.44141	C1orf194	0.655678	FIS1
ENSG00000116299	1	109656301	109749401	394	47	145637	0.0035752	0.49857	KIAA1324	0.694446	FIS1
ENSG00000031698	1	109756540	109780791	59	20	145622	0.43427	0.33204	SARS	0.575863	FIS1
ENSG00000143126	1	109792641	109818372	94	21	145751	-0.49966	0.69134	CELSR2	0.814839	FIS1
ENSG00000134222	1	109822178	109825808	13	9	145829	0.68035	0.24814	PSRC1	0.500839	FIS1
ENSG00000221986	1	109834987	109849663	62	20	145842	5.0142	2.6627e-07	MYBPHL	4.05761e-05	FIS1
ENSG00000134243	1	109852192	109940573	193	26	146098	4.6779	1.4493e-06	SORT1	0.00016205	FIS1
ENSG00000143106	1	109941653	109969062	64	17	146111	4.7491	1.0215e-06	PSMA5	0.00012373	FIS1
ENSG00000143028	1	110009180	110024759	58	9	145877	4.7327	1.1076e-06	SYPL2	0.00013037	FIS1
ENSG00000162650	1	110026101	110035426	17	7	145876	4.8723	5.5149e-07	ATXN7L2	7.23677e-05	FIS1
ENSG00000174151	1	110036674	110045554	21	8	145360	4.8314	6.7778e-07	CYB561D1	8.71247e-05	FIS1
ENSG00000181754	1	110046797	110052360	14	7	145110	4.8315	6.777e-07	AMIGO1	8.71247e-05	FIS1
ENSG00000156097	1	110082494	110091028	19	8	146124	2.0364	0.020854	GPR61	0.135929	FIS1
ENSG00000065135	1	110091233	110136975	131	32	146115	1.3128	0.094633	GNAI3	0.311606	FIS1
ENSG00000134183	1	110145889	110155679	31	13	146082	1.2411	0.10728	GNAT2	0.330749	FIS1
ENSG00000116337	1	110158726	110174673	47	15	145916	2.6705	0.003787	AMPD2	0.0485147	FIS1
ENSG00000168765	1	110198703	110208118	27	10	145917	2.2217	0.013153	GSTM4	0.104233	FIS1
ENSG00000213366	1	110210644	110252171	72	22	145367	1.0472	0.1475	GSTM2	0.387778	FIS1
ENSG00000134184	1	110230436	110251661	34	11	145313	0.90959	0.18152	GSTM1	0.431994	FIS1
ENSG00000134201	1	110254864	110318050	191	39	145615	0.17258	0.43149	GSTM5	0.64812	FIS1
ENSG00000134202	1	110276554	110284384	20	6	146011	0.71013	0.23881	GSTM3	0.491457	FIS1
ENSG00000198758	1	110292702	110306649	47	15	145326	0.3548	0.36137	EPS8L3	0.598321	FIS1
ENSG00000184371	1	110452864	110473614	56	19	145599	2.5314	0.005681	CSF1	0.0626154	FIS1
ENSG00000168710	1	110527308	110566357	95	21	145852	1.1822	0.11857	AHCYL1	0.349368	FIS1
ENSG00000143093	1	110574199	110617263	163	27	145852	3.4607	0.00026943	STRIP1	0.00747599	FIS1
ENSG00000156150	1	110602616	110613322	45	11	145734	3.4979	0.00023443	ALX3	0.00680459	FIS1
ENSG00000186150	1	110655062	110656569	4	2	146089	-0.36052	0.64077	UBL4B	0.78308	FIS1
ENSG00000197106	1	110693108	110744824	152	29	145435	1.1006	0.13553	SLC6A17	0.372214	FIS1
ENSG00000116396	1	110753965	110825722	281	41	145427	-0.46654	0.67958	KCNC4	0.807784	FIS1
ENSG00000162775	1	110881128	110889299	15	6	146163	-0.14487	0.55759	RBM15	0.733046	FIS1
ENSG00000168679	1	110905470	110933704	87	22	145955	-1.4315	0.92385	SLC16A4	0.951183	FIS1
ENSG00000134248	1	110943871	110950564	19	6	146248	0.073909	0.47054	LAMTOR5	0.675581	FIS1
ENSG00000143125	1	110993822	110999976	26	8	145629	-0.21296	0.58432	PROK1	0.749783	FIS1
ENSG00000143105	1	111059839	111061797	7	4	146500	0.9996	0.15875	KCNA10	0.402513	FIS1
ENSG00000177301	1	111136202	111174096	143	25	145716	1.6393	0.050577	KCNA2	0.22236	FIS1
ENSG00000177272	1	111214310	111217655	4	2	145951	-0.67651	0.75064	KCNA3	0.850309	FIS1
ENSG00000143119	1	111415775	111442550	102	17	144833	-0.049136	0.51959	CD53	0.708126	FIS1
ENSG00000121931	1	111489807	111506701	34	16	145806	-0.12012	0.54781	LRIF1	0.726761	FIS1
ENSG00000156171	1	111659955	111682838	71	14	146024	0.85403	0.19654	DRAM2	0.447286	FIS1
ENSG00000134255	1	111682249	111727724	117	36	145882	0.11505	0.4542	CEPT1	0.663412	FIS1
ENSG00000162777	1	111729796	111747157	60	24	145383	-1.5188	0.9356	DENND2D	0.958321	FIS1
ENSG00000064886	1	111743393	111786062	188	34	145687	1.5132	0.065116	CHI3L2	0.254928	FIS1
ENSG00000134216	1	111833484	111863188	224	27	145648	-0.73853	0.7699	CHIA	0.861423	FIS1
ENSG00000173947	1	111888910	111895635	35	8	146236	-1.6779	0.95332	PIFO	0.969064	FIS1
ENSG00000085465	1	111956936	111970399	64	14	146172	0.38532	0.35	OVGP1	0.59027	FIS1
ENSG00000116455	1	111982512	111991998	27	11	146290	-1.0638	0.8563	WDR77	0.911864	FIS1
ENSG00000116459	1	111991486	112005395	46	13	146175	-0.25544	0.60081	ATP5F1	0.7599	FIS1
ENSG00000143110	1	112016414	112021134	13	7	145526	-0.16001	0.56356	C1orf162	0.73594	FIS1
ENSG00000121933	1	112025970	112106584	307	42	145502	-1.0876	0.86162	ADORA3	0.914262	FIS1
ENSG00000116473	1	112084840	112259313	679	60	145846	2.5147	0.0059574	RAP1A	0.0640336	FIS1
ENSG00000197852	1	112223252	112298446	324	44	145907	2.535	0.0056227	FAM212B	0.0623657	FIS1
ENSG00000064703	1	112297867	112310638	59	12	146299	2.1356	0.016356	DDX20	0.117783	FIS1
ENSG00000171385	1	112313284	112531777	879	120	145454	1.6908	0.045439	KCND3	0.210187	FIS1
ENSG00000143079	1	112938803	113006078	193	12	146129	-2.0237	0.9785	CTTNBP2NL	0.985541	FIS1
ENSG00000134245	1	113009163	113072787	206	48	145130	0.11743	0.45326	WNT2B	0.662785	FIS1
ENSG00000007341	1	113066140	113163447	301	27	146144	-1.7705	0.96168	ST7L	0.974208	FIS1
ENSG00000116489	1	113161795	113214241	116	26	146154	-1.0329	0.84918	CAPZA1	0.907329	FIS1
ENSG00000155363	1	113215763	113243368	77	19	146143	-1.3201	0.90661	MOV10	0.940144	FIS1
ENSG00000155366	1	113243728	113250056	20	7	145285	-0.38324	0.64923	RHOC	0.789044	FIS1
ENSG00000271810	1	113245236	113254055	28	10	145195	-1.9959	0.97703	RP11-426L16.10	0.98427	FIS1
ENSG00000155367	1	113252616	113258099	20	12	145798	-1.7469	0.95967	PPM1J	0.972902	FIS1
ENSG00000184599	1	113263041	113269857	23	8	144187	-0.70516	0.75964	FAM19A3	0.855444	FIS1
ENSG00000155380	1	113454469	113499635	107	31	146099	1.0594	0.1447	SLC16A1	0.384401	FIS1
ENSG00000198799	1	113615831	113674882	150	30	145811	0.23896	0.40557	LRIG2	0.631013	FIS1
ENSG00000081026	1	113933371	114228545	720	49	145897	1.0412	0.1489	MAGI3	0.389658	FIS1
ENSG00000116793	1	114239453	114302111	153	26	145909	0.52267	0.3006	PHTF1	0.549039	FIS1
ENSG00000081019	1	114304454	114355098	102	28	145933	-0.29457	0.61584	RSBN1	0.770041	FIS1
ENSG00000134242	1	114356433	114414381	141	29	145769	-0.29527	0.61611	PTPN22	0.770127	FIS1
ENSG00000188761	1	114420790	114430169	36	17	145435	-1.2964	0.90258	BCL2L15	0.937354	FIS1
ENSG00000134262	1	114437370	114447823	27	12	146221	0.77701	0.21858	AP4B1	0.469725	FIS1
ENSG00000118655	1	114447763	114456708	17	8	145742	0.73134	0.23229	DCLRE1B	0.483545	FIS1
ENSG00000163349	1	114471814	114520426	100	28	145925	-0.59716	0.7248	HIPK1	0.834616	FIS1
ENSG00000116774	1	114522063	114524876	9	6	145757	-1.414	0.92131	OLFML3	0.949655	FIS1
ENSG00000134207	1	114631913	114696541	308	67	145272	-0.49704	0.69042	SYT6	0.81447	FIS1
ENSG00000197323	1	114935399	115053781	438	39	146217	0.95229	0.17048	TRIM33	0.418327	FIS1
ENSG00000116752	1	115110178	115124260	43	18	146331	0.59428	0.27616	BCAS2	0.526412	FIS1
ENSG00000175984	1	115125469	115213043	304	36	146215	0.014433	0.49424	DENND2C	0.691175	FIS1
ENSG00000116748	1	115215719	115238239	81	25	146174	1.2998	0.096835	AMPD1	0.314805	FIS1
ENSG00000213281	1	115247090	115259515	26	10	146172	0.1874	0.42567	NRAS	0.644626	FIS1
ENSG00000009307	1	115259534	115301297	130	29	146214	0.8057	0.21021	CSDE1	0.461071	FIS1
ENSG00000052723	1	115312100	115323306	13	7	145750	0.1958	0.42238	SIKE1	0.64185	FIS1
ENSG00000198765	1	115397424	115537991	435	33	146154	0.59504	0.27591	SYCP1	0.526353	FIS1
ENSG00000134200	1	115572415	115576941	30	6	146151	0.26764	0.39449	TSHB	0.623107	FIS1
ENSG00000134198	1	115590632	115632121	196	32	144862	-0.30945	0.62151	TSPAN2	0.772875	FIS1
ENSG00000134259	1	115828539	115880857	225	48	145692	1.3797	0.083847	NGF	0.292836	FIS1
ENSG00000173218	1	116184574	116240845	225	44	145265	1.0173	0.1545	VANGL1	0.397202	FIS1
ENSG00000118729	1	116242628	116311402	385	29	145795	0.68381	0.24705	CASQ2	0.499834	FIS1
ENSG00000177551	1	116378998	116386538	27	7	146135	0.60103	0.27391	NHLH2	0.524759	FIS1
ENSG00000163393	1	116519119	116612675	295	33	146076	0.71713	0.23665	SLC22A15	0.489163	FIS1
ENSG00000173212	1	116654376	116677861	105	24	146004	0.21104	0.41643	MAB21L3	0.638085	FIS1
ENSG00000163399	1	116915290	116952883	94	14	146163	0.97548	0.16466	ATP1A1	0.411094	FIS1
ENSG00000269279	1	116915890	116926718	31	9	146065	0.85355	0.19668	AL136376.1	0.447356	FIS1
ENSG00000116815	1	117057157	117113661	95	25	145335	-0.56268	0.71317	CD58	0.827209	FIS1
ENSG00000143061	1	117117031	117210375	166	51	144942	1.0077	0.15681	IGSF3	0.399813	FIS1
ENSG00000203864	1	117236734	117249225	23	14	144904	-0.0095171	0.5038	C1orf137	0.697573	FIS1
ENSG00000116824	1	117297007	117311850	50	15	146041	0.75772	0.22431	CD2	0.475164	FIS1
ENSG00000134247	1	117452679	117532980	285	34	145944	1.8683	0.03086	PTGFRN	0.170141	FIS1
ENSG00000134256	1	117544382	117579167	125	33	145631	1.1197	0.13141	CD101	0.366675	FIS1
ENSG00000116830	1	117602925	117650075	143	37	145784	1.2504	0.10558	TTF2	0.32797	FIS1
ENSG00000134253	1	117653682	117665209	54	14	146330	-0.48912	0.68762	TRIM45	0.812892	FIS1
ENSG00000134258	1	117686209	117753556	270	44	145600	0.49665	0.30972	VTCN1	0.556848	FIS1
ENSG00000198162	1	117910071	118071494	549	29	146199	-0.38887	0.65131	MAN1A2	0.790288	FIS1
ENSG00000183508	1	118148556	118170994	85	13	145938	-0.7001	0.75807	FAM46C	0.854581	FIS1
ENSG00000196505	1	118406107	118472253	216	20	146186	-0.86951	0.80772	GDAP2	0.883764	FIS1
ENSG00000065183	1	118472343	118509165	108	15	146157	-0.35992	0.64055	WDR3	0.782913	FIS1
ENSG00000155761	1	118496484	118727846	614	41	146048	-1.1113	0.86678	SPAG17	0.917083	FIS1
ENSG00000092607	1	119425669	119532179	358	35	145835	0.58816	0.27821	TBX15	0.528772	FIS1
ENSG00000116874	1	119573839	119683294	351	32	146064	0.80779	0.20961	WARS2	0.460579	FIS1
ENSG00000116882	1	119911402	119936753	79	17	146032	0.22894	0.40946	HAO2	0.633262	FIS1
ENSG00000203859	1	119957554	119965658	28	7	145951	0.62876	0.26475	HSD3B2	0.516596	FIS1
ENSG00000203857	1	120049821	120057681	26	6	145578	0.65887	0.25499	HSD3B1	0.507361	FIS1
ENSG00000143067	1	120162045	120190396	94	23	145241	-0.98153	0.83683	ZNF697	0.900344	FIS1
ENSG00000092621	1	120202421	120286838	247	43	144954	-0.75175	0.7739	PHGDH	0.863757	FIS1
ENSG00000134240	1	120290619	120311528	60	16	145334	-0.83346	0.79771	HMGCS2	0.876929	FIS1
ENSG00000134193	1	120336641	120354283	82	20	145416	-1.368	0.91434	REG4	0.945255	FIS1
ENSG00000134249	1	120436156	120439118	7	3	145555	0.90969	0.18149	ADAM30	0.431994	FIS1
ENSG00000134250	1	120454176	120612240	158	20	145719	0.59754	0.27507	NOTCH2	0.52577	FIS1
ENSG00000188610	1	120837756	120855681	4	2	144104	-0.44375	0.67139	FAM72B	0.802996	FIS1
ENSG00000198019	1	120926979	120935937	4	2	144659	-1.1579	0.87655	FCGR1B	0.922694	FIS1
ENSG00000178104	1	144836157	145076186	35	19	143903	-0.56117	0.71266	PDE4DIP	0.826922	FIS1
ENSG00000168509	1	145413095	145417545	4	2	144649	2.1631	0.015266	HFE2	0.113749	FIS1
ENSG00000117289	1	145438469	145442635	9	5	145775	1.8898	0.029393	TXNIP	0.165263	FIS1
ENSG00000121851	1	145456236	145470388	19	12	145398	1.0107	0.15608	POLR3GL	0.399035	FIS1
ENSG00000181039	1	145470508	145475646	10	7	145617	0.12886	0.44874	ANKRD34A	0.659721	FIS1
ENSG00000152022	1	145477085	145501669	32	16	145277	0.20761	0.41777	LIX1L	0.639153	FIS1
ENSG00000131795	1	145507598	145513536	5	3	144402	1.1009	0.13547	RBM8A	0.372214	FIS1
ENSG00000131779	1	145516252	145523730	3	2	144936	1.3118	0.094788	PEX11B	0.311823	FIS1
ENSG00000143127	1	145524891	145543868	35	14	145990	-0.39318	0.65291	ITGA10	0.790829	FIS1
ENSG00000198483	1	145549230	145568526	64	16	145385	-0.23931	0.59457	ANKRD35	0.755637	FIS1
ENSG00000131788	1	145575233	145586546	10	7	145517	-1.856	0.96827	PIAS3	0.978837	FIS1
ENSG00000186364	1	145586115	145589439	9	5	145126	-1.4972	0.93283	NUDT17	0.95678	FIS1
ENSG00000186141	1	145592605	145611025	35	12	145549	0.77868	0.21808	POLR3C	0.469451	FIS1
ENSG00000121848	1	145611036	145696218	159	20	145666	0.0076072	0.49697	RNF115	0.693202	FIS1
ENSG00000117281	1	145695798	145715614	39	10	145578	0.0091374	0.49635	CD160	0.692718	FIS1
ENSG00000174827	1	145726918	145764074	28	19	144895	0.39085	0.34795	PDZK1	0.589107	FIS1
ENSG00000117262	1	145764411	145827103	14	10	144408	0.62956	0.26449	GPR89A	0.516355	FIS1
ENSG00000131791	1	146626685	146644129	80	17	146001	-0.53032	0.70206	PRKAB2	0.821353	FIS1
ENSG00000131781	1	146646930	146714700	391	26	146227	-0.49881	0.69104	FMO5	0.814743	FIS1
ENSG00000131778	1	146714291	146767443	290	31	146184	0.77744	0.21845	CHD1L	0.469648	FIS1
ENSG00000116128	1	147013182	147098017	307	58	145843	1.2308	0.10919	BCL9	0.333914	FIS1
ENSG00000162836	1	147101453	147142618	152	25	145886	1.1592	0.12319	ACP6	0.355788	FIS1
ENSG00000143140	1	147228332	147245484	86	17	145646	0.17829	0.42925	GJA5	0.64677	FIS1
ENSG00000121634	1	147374946	147381393	34	11	145084	0.7572	0.22446	GJA8	0.475216	FIS1
ENSG00000188092	1	147400506	147465753	6	4	145144	0.20824	0.41752	GPR89B	0.639097	FIS1
ENSG00000203832	1	148250249	148347506	2	1	142267	0.25318	0.40007	NBPF20	0.627051	FIS1
ENSG00000243452	1	148555979	148596267	4	1	144902	0.07207	0.47127	NBPF15	0.676082	FIS1
ENSG00000203827	1	148739443	148758311	1	1	139463	-0.34931	0.63657	NBPF16	0.781283	FIS1
ENSG00000150337	1	149754227	149764074	1	1	146526	-0.81973	0.79382	FCGR1A	0.874484	FIS1
ENSG00000203814	1	149754245	149783928	12	3	145514	-0.2594	0.60233	HIST2H2BF	0.760561	FIS1
ENSG00000184678	1	149856010	149858232	4	2	145537	-0.48749	0.68705	HIST2H2BE	0.812625	FIS1
ENSG00000178096	1	149859440	149872351	37	6	145506	0.15167	0.43973	BOLA1	0.654263	FIS1
ENSG00000159164	1	149874870	149889434	31	10	145410	-0.22314	0.58829	SV2A	0.751943	FIS1
ENSG00000143368	1	149895209	149900236	16	3	145972	0.099662	0.46031	SF3B4	0.667655	FIS1
ENSG00000014914	1	149900543	149908791	22	6	145971	-1.0585	0.85508	MTMR11	0.911211	FIS1
ENSG00000163113	1	149909705	149982625	116	29	145676	0.88415	0.18831	OTUD7B	0.438887	FIS1
ENSG00000136631	1	150039369	150117505	176	17	145956	1.8237	0.034096	VPS45	0.179615	FIS1
ENSG00000023902	1	150121373	150136916	47	12	145367	2.1475	0.015876	PLEKHO1	0.115841	FIS1
ENSG00000143401	1	150190717	150208504	29	7	144541	-1.0232	0.8469	ANP32E	0.906218	FIS1
ENSG00000118298	1	150229554	150237478	15	9	145557	-1.3088	0.90471	CA14	0.93874	FIS1
ENSG00000117362	1	150237804	150241980	2	1	145180	-1.3981	0.91896	APH1A	0.947957	FIS1
ENSG00000118292	1	150240600	150253327	22	8	144976	0.24236	0.40425	C1orf54	0.630569	FIS1
ENSG00000159208	1	150254953	150259505	13	6	144961	-0.66715	0.74766	C1orf51	0.848295	FIS1
ENSG00000187145	1	150266289	150281414	60	9	146173	0.62411	0.26628	MRPS21	0.517817	FIS1
ENSG00000117360	1	150293925	150325671	100	16	146177	1.2549	0.10476	PRPF3	0.327035	FIS1
ENSG00000163125	1	150335567	150449042	405	21	146181	0.85072	0.19746	RPRD2	0.448139	FIS1
ENSG00000143374	1	150459887	150480078	66	11	146034	0.86306	0.19405	TARS2	0.445158	FIS1
ENSG00000143369	1	150480538	150486265	19	8	146174	-0.014157	0.50565	ECM1	0.698684	FIS1
ENSG00000143382	1	150521884	150533413	28	10	145663	0.63284	0.26342	ADAMTSL4	0.515065	FIS1
ENSG00000225996	1	150521897	150524367	2	1	144962	1.0193	0.15402	AL356356.1	0.396656	FIS1
ENSG00000143384	1	150547032	150552066	10	6	146337	0.30458	0.38034	MCL1	0.612361	FIS1
ENSG00000143420	1	150573327	150602088	74	19	145749	0.23108	0.40863	ENSA	0.632881	FIS1
ENSG00000143457	1	150618701	150669630	164	15	146183	-0.22183	0.58778	GOLPH3L	0.751569	FIS1
ENSG00000143452	1	150670536	150693364	73	8	146294	0.11954	0.45242	HORMAD1	0.662194	FIS1
ENSG00000163131	1	150702672	150738433	82	13	146195	-0.84374	0.80059	CTSS	0.878379	FIS1
ENSG00000143387	1	150768684	150780799	16	7	145945	0.75496	0.22514	CTSK	0.475749	FIS1
ENSG00000143437	1	150782181	150849244	137	23	145892	-0.54631	0.70757	ARNT	0.824013	FIS1
ENSG00000143379	1	150898739	150937213	99	24	146108	0.68925	0.24533	SETDB1	0.4982	FIS1
ENSG00000143418	1	150933059	150947479	43	11	146193	0.37984	0.35203	CERS2	0.591706	FIS1
ENSG00000143412	1	150954493	150968110	44	13	146074	0.14978	0.44047	ANXA9	0.654841	FIS1
ENSG00000143409	1	150969025	150980851	32	13	146005	-0.38995	0.65171	FAM63A	0.790411	FIS1
ENSG00000143363	1	150980896	151008189	114	23	145700	0.80948	0.20912	PRUNE	0.46039	FIS1
ENSG00000163141	1	151009046	151020076	46	18	146038	0.62847	0.26485	BNIPL	0.516631	FIS1
ENSG00000143443	1	151020216	151024462	7	2	146103	0.094085	0.46252	C1orf56	0.669202	FIS1
ENSG00000197622	1	151023447	151042801	54	17	146018	0.44743	0.32728	CDC42SE1	0.571929	FIS1
ENSG00000213190	1	151030234	151040970	31	9	146045	0.52936	0.29828	MLLT11	0.546932	FIS1
ENSG00000143458	1	151043054	151098018	190	31	146100	0.66758	0.2522	GABPB2	0.504934	FIS1
ENSG00000143434	1	151104161	151119104	58	14	145971	0.52459	0.29994	SEMA6C	0.548767	FIS1
ENSG00000163154	1	151129105	151132225	5	3	144709	-0.031374	0.51251	TNFAIP8L2	0.703807	FIS1
ENSG00000163156	1	151129140	151142773	34	8	145857	0.054476	0.47828	SCNM1	0.680387	FIS1
ENSG00000163155	1	151132224	151138424	16	5	145992	-1.7437	0.9594	LYSMD1	0.972823	FIS1
ENSG00000163157	1	151142462	151148760	15	6	146165	-0.36413	0.64212	TMOD4	0.783893	FIS1
ENSG00000163159	1	151142463	151167797	53	16	145933	0.35199	0.36242	VPS72	0.598888	FIS1
ENSG00000143398	1	151170425	151222012	158	23	145845	1.2708	0.10189	PIP5K1A	0.322768	FIS1
ENSG00000159352	1	151227179	151239955	26	8	145764	1.7258	0.042194	PSMD4	0.201236	FIS1
ENSG00000232671	1	151252500	151254405	5	3	145871	1.6283	0.051735	RP11-126K1.2	0.225246	FIS1
ENSG00000143373	1	151254094	151264656	18	7	146256	1.7806	0.037489	ZNF687	0.188502	FIS1
ENSG00000143393	1	151264273	151300191	85	21	145971	1.4219	0.077524	PI4KB	0.279287	FIS1
ENSG00000143390	1	151313116	151319833	10	5	145738	-0.45665	0.67604	RFX5	0.805451	FIS1
ENSG00000143416	1	151336778	151345209	28	17	145544	0.62882	0.26473	SELENBP1	0.516596	FIS1
ENSG00000159377	1	151372010	151374420	4	2	146399	0.30594	0.37982	PSMB4	0.612042	FIS1
ENSG00000143442	1	151375200	151431941	129	16	146040	1.1114	0.13321	POGZ	0.368842	FIS1
ENSG00000143375	1	151482986	151511168	49	15	145832	-0.041135	0.51641	CGN	0.706186	FIS1
ENSG00000143367	1	151512781	151556059	83	23	145733	0.10688	0.45744	TUFT1	0.665499	FIS1
ENSG00000143376	1	151584541	151671567	184	33	146020	3.4983	0.00023414	SNX27	0.00680459	FIS1
ENSG00000159409	1	151674880	151689290	35	10	145501	3.7894	7.5511e-05	CELF3	0.00309513	FIS1
ENSG00000240510	1	151682909	151702070	48	15	145529	3.6825	0.00011549	AL589765.1	0.00411755	FIS1
ENSG00000178796	1	151682909	151702281	48	15	145529	3.6825	0.00011549	RIIAD1	0.00411755	FIS1
ENSG00000143436	1	151732119	151736040	17	5	146178	3.1638	0.00077862	MRPL9	0.0161017	FIS1
ENSG00000143450	1	151735445	151743808	22	7	146187	3.6084	0.00015403	OAZ3	0.00505304	FIS1
ENSG00000182134	1	151742583	151763892	84	11	146140	3.6698	0.00012135	TDRKH	0.00423173	FIS1
ENSG00000213171	1	151772740	151778630	15	7	144939	3.4676	0.0002626	LINGO4	0.00738406	FIS1
ENSG00000143365	1	151778547	151804348	82	24	144817	2.7817	0.0027036	RORC	0.0389681	FIS1
ENSG00000225556	1	151810295	151813033	8	3	144163	0.42194	0.33653	C2CD4D	0.579784	FIS1
ENSG00000196407	1	151819739	151826173	17	5	145911	2.0487	0.020245	THEM5	0.133665	FIS1
ENSG00000159445	1	151846060	151882284	103	14	146080	1.3344	0.091033	THEM4	0.305731	FIS1
ENSG00000197747	1	151955391	151966866	27	9	146123	2.5065	0.0060969	S100A10	0.0647959	FIS1
ENSG00000163191	1	152004982	152020383	27	5	145971	0.54198	0.29392	S100A11	0.542586	FIS1
ENSG00000182898	1	152056620	152061540	4	2	145815	-0.21849	0.58648	TCHHL1	0.750951	FIS1
ENSG00000159450	1	152078793	152086556	19	12	146114	1.9571	0.025167	TCHH	0.152196	FIS1
ENSG00000215853	1	152126071	152131704	9	4	146253	3.2622	0.00055275	RPTN	0.01239	FIS1
ENSG00000197915	1	152184558	152196669	46	8	146284	-0.085449	0.53405	HRNR	0.717486	FIS1
ENSG00000143631	1	152274651	152297679	89	13	146097	-0.39878	0.65497	FLG	0.792285	FIS1
ENSG00000143520	1	152321211	152332482	31	9	146340	1.1829	0.11842	FLG2	0.349119	FIS1
ENSG00000143536	1	152381719	152386739	14	5	146132	0.79271	0.21397	CRNN	0.465054	FIS1
ENSG00000186207	1	152483320	152484653	5	2	145124	1.0569	0.14528	LCE5A	0.385049	FIS1
ENSG00000169509	1	152486978	152488486	6	2	146411	0.47276	0.31819	CRCT1	0.564556	FIS1
ENSG00000185966	1	152538130	152539248	1	1	143112	0.32925	0.37098	LCE3E	0.606352	FIS1
ENSG00000163202	1	152551857	152552980	5	3	146078	-0.89034	0.81336	LCE3D	0.887268	FIS1
ENSG00000187223	1	152635872	152637135	7	4	146239	0.59882	0.27465	LCE2D	0.525495	FIS1
ENSG00000187180	1	152647771	152649050	5	1	146377	-3.0453	0.99884	LCE2C	0.999071	FIS1
ENSG00000159455	1	152647771	152659877	58	13	146124	-1.0556	0.85443	LCE2B	0.910929	FIS1
ENSG00000187173	1	152670840	152671918	5	3	146437	0.1527	0.43932	LCE2A	0.653859	FIS1
ENSG00000187170	1	152680636	152681967	4	2	146311	0.30128	0.3816	LCE4A	0.613188	FIS1
ENSG00000198854	1	152691998	152692905	7	2	146430	1.4378	0.075246	C1orf68	0.274946	FIS1
ENSG00000203786	1	152730506	152734529	11	4	146366	0.22896	0.40945	KPRP	0.633262	FIS1
ENSG00000240386	1	152748848	152749445	3	2	145641	-1.8906	0.97066	LCE1F	0.980257	FIS1
ENSG00000186226	1	152758690	152760902	9	3	145957	0.26424	0.3958	LCE1E	0.624196	FIS1
ENSG00000172155	1	152769227	152770657	2	1	145715	-0.64367	0.7401	LCE1D	0.843262	FIS1
ENSG00000197084	1	152777311	152779107	15	4	145696	-0.1711	0.56793	LCE1C	0.738965	FIS1
ENSG00000196734	1	152784447	152785585	2	1	146004	1.3943	0.081612	LCE1B	0.288096	FIS1
ENSG00000186844	1	152799949	152800573	4	2	145975	1.0814	0.13977	LCE1A	0.377704	FIS1
ENSG00000235942	1	152815344	152816459	4	2	146170	1.2896	0.098588	LCE6A	0.31785	FIS1
ENSG00000163206	1	152850793	152857523	26	6	146325	1.9983	0.02284	SMCP	0.143225	FIS1
ENSG00000163207	1	152881021	152884362	16	2	146198	0.95684	0.16932	IVL	0.41719	FIS1
ENSG00000184148	1	152943142	152945050	3	1	146288	-0.47401	0.68225	SPRR4	0.809561	FIS1
ENSG00000169474	1	152956557	152958289	8	2	146343	0.32443	0.37281	SPRR1A	0.607504	FIS1
ENSG00000163209	1	152974223	152976332	21	2	146102	-0.29351	0.61543	SPRR3	0.769939	FIS1
ENSG00000169469	1	153003678	153005376	13	1	145956	-0.28222	0.61111	SPRR1B	0.766713	FIS1
ENSG00000163216	1	153012201	153014407	9	2	146290	-0.28334	0.61154	SPRR2D	0.766799	FIS1
ENSG00000241794	1	153028589	153030013	2	1	145855	-0.88007	0.81059	SPRR2A	0.885566	FIS1
ENSG00000196805	1	153042700	153113927	296	32	145736	0.76059	0.22345	SPRR2B	0.474385	FIS1
ENSG00000203785	1	153065611	153078660	56	14	145547	1.8585	0.031552	SPRR2E	0.172541	FIS1
ENSG00000244094	1	153084590	153085991	5	2	145353	0.8355	0.20172	SPRR2F	0.452669	FIS1
ENSG00000159516	1	153122058	153123345	4	1	146299	-0.35853	0.64003	SPRR2G	0.782908	FIS1
ENSG00000203784	1	153175919	153177596	3	2	146167	-1.303	0.90371	LELP1	0.938063	FIS1
ENSG00000203783	1	153190060	153191793	6	2	142902	0.51268	0.30409	PRR9	0.552349	FIS1
ENSG00000203782	1	153232176	153234598	6	4	146164	1.5704	0.05816	LOR	0.240112	FIS1
ENSG00000159527	1	153270338	153283194	44	11	145287	-1.3341	0.90892	PGLYRP3	0.941403	FIS1
ENSG00000163218	1	153302596	153321316	90	9	146034	-0.30114	0.61835	PGLYRP4	0.771217	FIS1
ENSG00000163220	1	153330330	153333503	5	3	145402	-0.11065	0.54405	S100A9	0.724225	FIS1
ENSG00000163221	1	153346184	153348125	2	1	145806	0.20821	0.41753	S100A12	0.639097	FIS1
ENSG00000143546	1	153362508	153363664	6	3	146033	1.5956	0.055285	S100A8	0.233863	FIS1
ENSG00000184330	1	153389000	153395701	24	6	145666	-1.0592	0.85525	S100A7A	0.911289	FIS1
ENSG00000197364	1	153409534	153412425	14	7	145944	0.88489	0.18811	S100A7L2	0.438668	FIS1
ENSG00000143556	1	153430220	153433177	11	5	145950	0.61003	0.27092	S100A7	0.522058	FIS1
ENSG00000197956	1	153507075	153508720	5	3	145838	-1.0274	0.84789	S100A6	0.906597	FIS1
ENSG00000196420	1	153509623	153514241	10	3	145661	0.28909	0.38626	S100A5	0.616414	FIS1
ENSG00000196154	1	153516089	153522612	34	4	146160	-0.74866	0.77297	S100A4	0.86341	FIS1
ENSG00000188015	1	153519805	153521848	19	2	146226	-0.6827	0.7526	S100A3	0.851547	FIS1
ENSG00000196754	1	153533584	153540366	20	8	145693	-0.23443	0.59267	S100A2	0.7543	FIS1
ENSG00000188643	1	153579362	153585621	14	6	145211	-0.12692	0.5505	S100A16	0.728704	FIS1
ENSG00000189334	1	153586731	153589462	8	2	146123	0.92876	0.17651	S100A14	0.425751	FIS1
ENSG00000189171	1	153591263	153606568	46	12	145215	1.5693	0.058284	S100A13	0.240466	FIS1
ENSG00000160678	1	153600402	153604513	10	3	143800	1.1424	0.12664	S100A1	0.360233	FIS1
ENSG00000160679	1	153606525	153618782	36	7	145618	1.7693	0.038426	CHTOP	0.190777	FIS1
ENSG00000143553	1	153631130	153634306	8	4	146349	1.0206	0.15372	SNAPIN	0.396275	FIS1
ENSG00000143621	1	153634512	153643524	16	5	146022	1.3884	0.082509	ILF2	0.289901	FIS1
ENSG00000169418	1	153651113	153666468	25	10	145808	1.6993	0.04463	NPR1	0.208005	FIS1
ENSG00000143624	1	153700543	153746555	108	26	145935	-0.41872	0.66229	INTS3	0.797109	FIS1
ENSG00000143554	1	153746830	153752633	12	7	146178	0.10052	0.45997	SLC27A3	0.667352	FIS1
ENSG00000143614	1	153777201	153895451	286	28	146099	4.2573	1.0345e-05	GATAD2B	0.00071331	FIS1
ENSG00000198837	1	153901977	153919172	27	7	146257	4.2195	1.2244e-05	DENND4B	0.00081754	FIS1
ENSG00000160741	1	153920145	153931101	19	8	145968	4.4045	5.302e-06	CRTC2	0.00042999	FIS1
ENSG00000143570	1	153931575	153940188	21	10	146063	4.2172	1.2366e-05	SLC39A1	0.00081989	FIS1
ENSG00000143578	1	153940010	153946839	18	7	146130	3.9317	4.2171e-05	CREB3L4	0.00203281	FIS1
ENSG00000143543	1	153946745	153950164	2	1	145962	3.4671	0.0002631	JTB	0.00738713	FIS1
ENSG00000143545	1	153954127	153958834	6	4	145975	1.3173	0.09387	RAB13	0.310588	FIS1
ENSG00000177954	1	153963235	153964626	5	3	146401	-0.28644	0.61273	RPS27	0.767934	FIS1
ENSG00000143552	1	153965161	154127592	310	29	145838	4.4891	3.5759e-06	NUP210L	0.0003233	FIS1
ENSG00000143549	1	154127784	154167124	80	20	146118	2.531	0.0056876	TPM3	0.0626154	FIS1
ENSG00000163263	1	154171848	154178809	11	8	146182	0.39161	0.34767	C1orf189	0.588897	FIS1
ENSG00000143612	1	154179182	154193104	31	12	146131	1.5289	0.063143	C1orf43	0.251507	FIS1
ENSG00000143569	1	154192655	154243986	120	25	146049	1.0431	0.14844	UBAP2L	0.389058	FIS1
ENSG00000143575	1	154244987	154248351	5	3	146222	0.89278	0.18599	HAX1	0.436789	FIS1
ENSG00000143595	1	154293566	154297801	16	6	145934	0.28878	0.38638	AQP10	0.616433	FIS1
ENSG00000143515	1	154298029	154323783	77	17	146192	-0.089368	0.53561	ATP8B2	0.718619	FIS1
ENSG00000160712	1	154377669	154441926	213	34	145640	1.1598	0.12307	IL6R	0.355695	FIS1
ENSG00000169291	1	154442248	154474589	59	16	145720	0.60906	0.27124	SHE	0.522143	FIS1
ENSG00000163239	1	154474695	154520623	188	16	145973	0.62091	0.26733	TDRD10	0.518796	FIS1
ENSG00000160714	1	154521053	154531504	24	8	145763	0.61374	0.26969	UBE2Q1	0.52123	FIS1
ENSG00000160716	1	154540257	154552502	34	17	145827	0.72465	0.23433	CHRNB2	0.486389	FIS1
ENSG00000160710	1	154554538	154600475	112	15	145992	2.3357	0.009754	ADAR	0.0867793	FIS1
ENSG00000268141	1	154585067	154585190	1	1	145826	0.81086	0.20872	AL606500.1	0.459979	FIS1
ENSG00000143603	1	154669931	154842756	637	115	145302	3.5097	0.00022433	KCNN3	0.00659244	FIS1
ENSG00000163344	1	154897210	154909467	41	12	146211	0.01679	0.4933	PMVK	0.6906	FIS1
ENSG00000163346	1	154916552	154928599	26	16	146046	1.1258	0.13012	PBXIP1	0.364799	FIS1
ENSG00000163348	1	154929502	154936329	9	6	145990	0.57927	0.2812	PYGO2	0.531359	FIS1
ENSG00000160691	1	154934774	154946871	25	9	146136	-0.10779	0.54292	SHC1	0.723654	FIS1
ENSG00000173207	1	154947129	154951725	5	3	145452	0.16245	0.43548	CKS1B	0.650957	FIS1
ENSG00000160688	1	154955814	154965587	21	5	146087	-0.34977	0.63674	FLAD1	0.781339	FIS1
ENSG00000160685	1	154975127	154990998	27	12	144689	0.9227	0.17808	ZBTB7B	0.427133	FIS1
ENSG00000163354	1	154990996	155006257	44	17	145518	0.66038	0.2545	DCST2	0.507014	FIS1
ENSG00000163357	1	155006300	155023406	43	16	145721	1.0573	0.14518	DCST1	0.38492	FIS1
ENSG00000143537	1	155023042	155035252	31	13	145924	0.73832	0.23016	ADAM15	0.481617	FIS1
ENSG00000243364	1	155036207	155042029	8	5	145937	0.086416	0.46557	EFNA4	0.671609	FIS1
ENSG00000251246	1	155036224	155059283	51	17	145836	0.17814	0.42931	EFNA3	0.64677	FIS1
ENSG00000143590	1	155036224	155060014	53	17	145840	0.12946	0.4485	EFNA3	0.659632	FIS1
ENSG00000169242	1	155099936	155107333	22	10	146002	0.49223	0.31128	EFNA1	0.558095	FIS1
ENSG00000169241	1	155107820	155111329	6	4	146222	-0.85671	0.8042	SLC50A1	0.88109	FIS1
ENSG00000179085	1	155112367	155113071	1	1	146381	1.6522	0.049246	DPM3	0.219319	FIS1
ENSG00000163463	1	155141884	155145951	13	5	146074	0.14581	0.44204	KRTCAP2	0.655789	FIS1
ENSG00000273088	1	155141885	155159748	44	16	145982	0.26404	0.39587	RP11-201K10.3	0.624196	FIS1
ENSG00000163462	1	155145873	155157447	26	14	145937	0.54826	0.29176	TRIM46	0.54137	FIS1
ENSG00000185499	1	155158300	155162707	6	4	146145	-1.0703	0.85775	MUC1	0.912617	FIS1
ENSG00000169231	1	155165379	155178842	29	12	146144	-0.0030271	0.50121	THBS3	0.695689	FIS1
ENSG00000173171	1	155178490	155183615	10	5	146084	2.0281	0.021275	MTX1	0.137252	FIS1
ENSG00000177628	1	155204243	155214490	23	6	146095	-0.1661	0.56596	GBA	0.737391	FIS1
ENSG00000160767	1	155216996	155225274	26	4	146088	0.51749	0.30241	FAM189B	0.55078	FIS1
ENSG00000116521	1	155225770	155232221	15	6	146175	-0.47006	0.68084	SCAMP3	0.80857	FIS1
ENSG00000176444	1	155232659	155248282	32	12	146112	0.54359	0.29336	CLK2	0.542241	FIS1
ENSG00000143630	1	155247374	155259639	37	10	146129	-0.20559	0.58144	HCN3	0.748375	FIS1
ENSG00000143627	1	155259630	155271225	26	8	146276	0.020437	0.49185	PKLR	0.689508	FIS1
ENSG00000160752	1	155278539	155290457	24	8	145997	0.65804	0.25526	FDPS	0.507512	FIS1
ENSG00000160753	1	155290687	155300905	15	8	146337	1.2434	0.10685	RUSC1	0.330124	FIS1
ENSG00000116539	1	155305059	155532598	386	68	145969	0.86252	0.1942	ASH1L	0.445185	FIS1
ENSG00000125459	1	155579979	155718153	213	48	146012	1.2975	0.097225	MSTO1	0.315317	FIS1
ENSG00000163374	1	155629237	155658791	47	21	146116	0.71357	0.23775	YY1AP1	0.490343	FIS1
ENSG00000132676	1	155657751	155708801	91	23	146066	1.4044	0.080098	DAP3	0.284941	FIS1
ENSG00000116580	1	155719508	155829191	255	27	146105	1.201	0.11488	GON4L	0.343803	FIS1
ENSG00000132718	1	155829300	155854990	51	16	145944	1.1606	0.12291	SYT11	0.355395	FIS1
ENSG00000143622	1	155867599	155881195	28	7	145927	-0.60112	0.72612	RIT1	0.835409	FIS1
ENSG00000132680	1	155882834	155904191	36	9	146093	-0.57661	0.7179	KIAA0907	0.830452	FIS1
ENSG00000173080	1	155911480	155912625	1	1	146526	-1.1423	0.87334	RXFP4	0.920752	FIS1
ENSG00000116584	1	155916630	155976861	138	32	145753	0.24053	0.40496	ARHGEF2	0.630936	FIS1
ENSG00000163479	1	155978839	155990750	26	10	145530	1.0054	0.15735	SSR2	0.400658	FIS1
ENSG00000160803	1	156005092	156023585	44	21	145917	0.35584	0.36098	UBQLN4	0.597921	FIS1
ENSG00000116586	1	156024543	156028301	8	4	145766	0.28044	0.38957	LAMTOR2	0.619093	FIS1
ENSG00000132698	1	156030951	156040295	12	8	145983	-0.77249	0.78009	RAB25	0.866991	FIS1
ENSG00000254726	1	156041804	156051789	20	9	145276	2.6786	0.0036963	MEX3A	0.0478022	FIS1
ENSG00000160789	1	156052364	156109880	188	22	145905	2.149	0.015817	LMNA	0.115754	FIS1
ENSG00000196189	1	156117157	156147543	72	20	145380	0.65009	0.25782	SEMA4A	0.510366	FIS1
ENSG00000160785	1	156163880	156182587	44	11	145306	-0.032288	0.51288	SLC25A44	0.704111	FIS1
ENSG00000260238	1	156182773	156213123	107	19	145835	-0.72851	0.76685	PMF1-BGLAP	0.859607	FIS1
ENSG00000160783	1	156182784	156212874	107	19	145835	-0.72851	0.76685	PMF1	0.859607	FIS1
ENSG00000242252	1	156211753	156213112	3	2	145652	-0.57203	0.71635	BGLAP	0.829523	FIS1
ENSG00000160781	1	156213206	156217881	10	5	145273	1.8431	0.032654	PAQR6	0.175692	FIS1
ENSG00000198952	1	156219015	156252620	111	17	145800	1.4348	0.075672	SMG5	0.275827	FIS1
ENSG00000163472	1	156252726	156262976	31	11	146146	1.006	0.15721	TMEM79	0.400515	FIS1
ENSG00000198715	1	156259880	156265463	15	5	146272	0.94942	0.1712	C1orf85	0.41912	FIS1
ENSG00000189030	1	156268415	156269428	3	2	146055	1.049	0.14709	VHLL	0.387483	FIS1
ENSG00000163468	1	156278759	156337664	152	21	146017	0.97046	0.16591	CCT3	0.412738	FIS1
ENSG00000163467	1	156307105	156316786	21	8	146039	0.32864	0.37121	TSACC	0.606518	FIS1
ENSG00000132677	1	156339003	156355011	63	15	145725	-0.059991	0.52392	RHBG	0.711076	FIS1
ENSG00000125462	1	156374042	156400493	54	23	145751	1.0255	0.15257	C1orf61	0.394818	FIS1
ENSG00000116604	1	156433519	156470620	117	26	145908	3.3163	0.00045617	MEF2D	0.0109527	FIS1
ENSG00000183856	1	156495197	156542396	145	25	146099	-0.40984	0.65904	IQGAP3	0.795212	FIS1
ENSG00000187862	1	156549519	156556562	25	6	146253	-0.31592	0.62397	TTC24	0.773962	FIS1
ENSG00000163382	1	156561554	156564091	14	2	146414	-1.5857	0.9436	APOA1BP	0.963099	FIS1
ENSG00000160818	1	156564279	156571288	48	6	146174	-0.26868	0.60591	GPATCH4	0.763423	FIS1
ENSG00000132702	1	156589086	156595517	9	3	145956	-0.66455	0.74683	HAPLN2	0.847574	FIS1
ENSG00000132692	1	156611182	156629324	51	18	145249	0.37318	0.35451	BCAN	0.593394	FIS1
ENSG00000132688	1	156638555	156647189	26	7	145779	-0.37206	0.64508	NES	0.786212	FIS1
ENSG00000143320	1	156669398	156675608	20	10	145105	-1.0955	0.86335	CRABP2	0.915172	FIS1
ENSG00000143319	1	156691683	156698591	18	9	146195	1.1952	0.116	ISG20L2	0.345439	FIS1
ENSG00000143303	1	156698234	156706752	21	9	146256	1.7892	0.036792	RRNAD1	0.186883	FIS1
ENSG00000143314	1	156707095	156711382	13	7	145622	1.4044	0.080102	MRPL24	0.284941	FIS1
ENSG00000143321	1	156711899	156736717	71	20	145930	1.091	0.13764	HDGF	0.375005	FIS1
ENSG00000143294	1	156720402	156770607	170	29	146075	0.34972	0.36327	PRCC	0.599664	FIS1
ENSG00000027869	1	156776035	156786654	31	13	144813	1.145	0.1261	SH2D2A	0.359503	FIS1
ENSG00000198400	1	156785432	156851642	215	51	145458	0.11962	0.45239	NTRK1	0.662194	FIS1
ENSG00000027644	1	156809855	156828810	31	15	144872	0.082248	0.46722	INSRR	0.672501	FIS1
ENSG00000187800	1	156863490	156886226	95	16	145980	-0.7452	0.77193	PEAR1	0.862765	FIS1
ENSG00000160838	1	156890442	156902886	49	12	146100	1.3781	0.084084	LRRC71	0.292961	FIS1
ENSG00000132694	1	156904632	157015162	329	29	146089	0.81096	0.20869	ARHGEF11	0.459979	FIS1
ENSG00000253831	1	157061836	157069600	52	18	145641	-1.2623	0.89658	ETV3L	0.934268	FIS1
ENSG00000117036	1	157090983	157108266	25	15	145688	0.65937	0.25483	ETV3	0.50727	FIS1
ENSG00000143297	1	157483167	157522310	192	21	146146	2.3924	0.0083703	FCRL5	0.0787283	FIS1
ENSG00000163518	1	157543539	157567870	94	17	146170	0.69954	0.24211	FCRL4	0.494802	FIS1
ENSG00000160856	1	157644111	157670647	68	17	145990	-0.54448	0.70694	FCRL3	0.823868	FIS1
ENSG00000132704	1	157715523	157746922	93	25	145536	0.28386	0.38826	FCRL2	0.617991	FIS1
ENSG00000163534	1	157764193	157789895	89	13	145789	0.18042	0.42841	FCRL1	0.646387	FIS1
ENSG00000073754	1	157800704	157868046	265	25	145838	-2.5904	0.99521	CD5L	0.996581	FIS1
ENSG00000183853	1	157963063	158070052	445	81	145636	-0.49336	0.68912	KIRREL	0.81382	FIS1
ENSG00000158473	1	158149737	158154686	14	5	145476	-1.1779	0.88059	CD1D	0.924887	FIS1
ENSG00000158477	1	158223927	158228059	21	9	145849	0.45727	0.32374	CD1A	0.569042	FIS1
ENSG00000158481	1	158259576	158263420	7	5	146096	0.46126	0.32231	CD1C	0.567496	FIS1
ENSG00000158485	1	158297741	158301321	18	10	146261	0.61607	0.26892	CD1B	0.520433	FIS1
ENSG00000158488	1	158323254	158327343	6	4	146173	-0.73482	0.76877	CD1E	0.861042	FIS1
ENSG00000186306	1	158368312	158369256	9	4	146503	-1.3939	0.91832	OR10T2	0.94771	FIS1
ENSG00000180708	1	158389718	158390656	4	2	146344	1.0059	0.15723	OR10K2	0.400515	FIS1
ENSG00000173285	1	158435272	158436344	5	3	146378	-0.51044	0.69513	OR10K1	0.81722	FIS1
ENSG00000198965	1	158449668	158450675	7	4	146519	-0.60177	0.72634	OR10R2	0.835561	FIS1
ENSG00000197532	1	158516918	158517895	6	3	146483	-0.6265	0.73451	OR6Y1	0.840412	FIS1
ENSG00000186440	1	158532441	158533394	9	5	146400	-1.5695	0.94173	OR6P1	0.9622	FIS1
ENSG00000186400	1	158548709	158549689	9	3	146520	-0.63521	0.73735	OR10X1	0.841871	FIS1
ENSG00000198967	1	158576229	158577170	4	2	146526	-0.58552	0.7209	OR10Z1	0.832135	FIS1
ENSG00000163554	1	158580496	158656488	253	33	145905	-0.2337	0.59239	SPTA1	0.754248	FIS1
ENSG00000196171	1	158669369	158670486	1	1	145863	1.93	0.026803	OR6K2	0.157563	FIS1
ENSG00000203757	1	158686958	158687953	4	2	146511	0.75698	0.22453	OR6K3	0.475268	FIS1
ENSG00000180433	1	158724510	158725681	7	5	146392	-0.35465	0.63857	OR6K6	0.782388	FIS1
ENSG00000197403	1	158735466	158736492	9	3	146481	1.8116	0.035023	OR6N1	0.181812	FIS1
ENSG00000188340	1	158746472	158747425	4	2	146306	0.082493	0.46713	OR6N2	0.672466	FIS1
ENSG00000163563	1	158801107	158819296	57	16	145505	0.93716	0.17434	MNDA	0.423255	FIS1
ENSG00000163564	1	158900586	158946844	130	24	145398	-0.15559	0.56182	PYHIN1	0.734949	FIS1
ENSG00000163565	1	158969758	159024945	277	19	145766	-0.0083518	0.50333	IFI16	0.697384	FIS1
ENSG00000163568	1	159032274	159116886	243	48	145682	0.41706	0.33832	AIM2	0.581489	FIS1
ENSG00000162706	1	159141399	159173103	107	32	145614	-0.94544	0.82778	CADM3	0.895041	FIS1
ENSG00000213088	1	159173097	159176290	20	9	145448	0.70126	0.24157	DARC	0.494337	FIS1
ENSG00000179639	1	159259504	159278014	62	15	145853	1.8682	0.030869	FCER1A	0.170141	FIS1
ENSG00000196266	1	159283460	159284449	2	1	146526	0.44402	0.32851	OR10J3	0.573073	FIS1
ENSG00000196184	1	159409512	159410600	7	4	146377	3.1641	0.0007779	OR10J1	0.0161017	FIS1
ENSG00000184155	1	159504793	159505842	2	1	146152	-1.5684	0.9416	OR10J5	0.962119	FIS1
ENSG00000132703	1	159557615	159558655	3	2	146458	-1.5986	0.94505	APCS	0.963977	FIS1
ENSG00000132693	1	159682079	159684379	6	3	146217	-0.1556	0.56183	CRP	0.734949	FIS1
ENSG00000158716	1	159750722	159752333	7	4	145793	-0.75069	0.77358	DUSP23	0.863514	FIS1
ENSG00000181036	1	159770301	159786041	76	14	145723	0.17129	0.432	FCRL6	0.648571	FIS1
ENSG00000158714	1	159796540	159807039	39	14	144911	-0.45275	0.67464	SLAMF8	0.804947	FIS1
ENSG00000188004	1	159804264	159825137	76	27	144952	-0.59562	0.72428	C1orf204	0.834308	FIS1
ENSG00000243284	1	159824106	159832447	39	12	144972	0.060261	0.47597	VSIG8	0.679095	FIS1
ENSG00000256029	1	159827690	159842843	72	12	145247	0.39851	0.34513	RP11-190A12.7	0.587558	FIS1
ENSG00000213085	1	159842154	159869953	109	23	145811	1.5585	0.059556	CCDC19	0.24334	FIS1
ENSG00000158710	1	159887897	159895522	23	10	145309	1.7217	0.042562	TAGLN2	0.201972	FIS1
ENSG00000085552	1	159896829	159915386	71	18	145780	2.0031	0.022583	IGSF9	0.142101	FIS1
ENSG00000162723	1	159921282	159924044	11	3	145745	-0.59268	0.7233	SLAMF9	0.833667	FIS1
ENSG00000143315	1	159997462	160001783	12	8	145911	1.1538	0.1243	PIGM	0.356794	FIS1
ENSG00000177807	1	160007257	160040038	89	25	145157	1.0434	0.14837	KCNJ10	0.388957	FIS1
ENSG00000162728	1	160051360	160060353	32	11	145415	0.31707	0.3756	KCNJ9	0.609637	FIS1
ENSG00000162729	1	160061130	160068733	14	4	145282	0.90681	0.18225	IGSF8	0.432678	FIS1
ENSG00000018625	1	160085549	160113381	124	31	145672	0.72268	0.23494	ATP1A2	0.487153	FIS1
ENSG00000132681	1	160121360	160156767	148	39	145371	1.0407	0.149	ATP1A4	0.389658	FIS1
ENSG00000143318	1	160160285	160171676	26	10	145665	1.5224	0.063958	CASQ1	0.25281	FIS1
ENSG00000162734	1	160175127	160185166	20	14	145818	-0.0024074	0.50096	PEA15	0.695528	FIS1
ENSG00000132716	1	160185505	160254920	133	24	145944	2.5438	0.0054824	DCAF8	0.0613986	FIS1
ENSG00000258465	1	160187254	160254920	129	22	145975	2.5485	0.0054094	DCAF8	0.0610245	FIS1
ENSG00000162735	1	160246602	160256138	17	9	146143	2.3878	0.0084737	PEX19	0.0793043	FIS1
ENSG00000122218	1	160259063	160313190	125	29	145928	2.1898	0.014269	COPA	0.109649	FIS1
ENSG00000162736	1	160313062	160328742	55	18	145283	2.1882	0.014326	NCSTN	0.110042	FIS1
ENSG00000171786	1	160336857	160342638	16	6	144037	1.8042	0.035602	NHLH1	0.183858	FIS1
ENSG00000162738	1	160370376	160398468	80	18	145795	2.7357	0.0031127	VANGL2	0.0426523	FIS1
ENSG00000162739	1	160454820	160493052	154	27	145456	-0.41348	0.66037	SLAMF6	0.795762	FIS1
ENSG00000066294	1	160510885	160549306	154	23	145990	-0.8063	0.78996	CD84	0.87196	FIS1
ENSG00000117090	1	160577890	160617085	142	31	145438	-0.22736	0.58993	SLAMF1	0.752994	FIS1
ENSG00000117091	1	160648536	160681641	156	30	145174	-0.28223	0.61112	CD48	0.766713	FIS1
ENSG00000026751	1	160709037	160724611	53	12	145923	0.45182	0.3257	SLAMF7	0.570806	FIS1
ENSG00000122224	1	160765864	160798051	111	15	145887	-0.76088	0.77663	LY9	0.865281	FIS1
ENSG00000122223	1	160799950	160832692	160	23	145965	-1.0936	0.86293	CD244	0.914881	FIS1
ENSG00000179914	1	160846329	160854960	45	5	146222	0.083075	0.4669	ITLN1	0.67245	FIS1
ENSG00000158764	1	160914815	160924589	39	13	145901	0.17814	0.42931	ITLN2	0.64677	FIS1
ENSG00000158769	1	160965001	160991138	97	14	146158	0.45856	0.32328	F11R	0.568515	FIS1
ENSG00000270149	1	160967747	161008752	145	26	146039	0.32503	0.37258	RP11-544M22.13	0.60746	FIS1
ENSG00000215845	1	161007421	161008780	3	2	146405	0.89836	0.1845	TSTD1	0.435136	FIS1
ENSG00000158773	1	161009041	161015767	27	7	146228	0.54199	0.29391	USF1	0.542586	FIS1
ENSG00000186517	1	161016736	161039760	66	21	145936	1.2524	0.10521	ARHGAP30	0.327587	FIS1
ENSG00000268154	1	161035655	161035943	1	1	144748	1.1205	0.13125	AL591806.1	0.366337	FIS1
ENSG00000143217	1	161040785	161059389	62	23	145845	3.4591	0.00027098	PVRL4	0.00748733	FIS1
ENSG00000162755	1	161068151	161070136	7	4	145904	1.5275	0.063323	KLHDC9	0.251626	FIS1
ENSG00000143256	1	161070346	161087901	57	17	146162	2.5591	0.0052472	PFDN2	0.0596577	FIS1
ENSG00000158793	1	161087876	161095235	15	8	146207	2.6567	0.0039454	NIT1	0.0495364	FIS1
ENSG00000158796	1	161090764	161102478	19	7	146298	2.5215	0.005842	DEDD	0.0633699	FIS1
ENSG00000143222	1	161122566	161128646	20	9	146081	2.4127	0.0079175	UFC1	0.0757408	FIS1
ENSG00000143258	1	161129240	161135513	13	8	146289	1.875	0.030395	USP21	0.168738	FIS1
ENSG00000143224	1	161136200	161147803	35	15	146293	1.8532	0.031925	PPOX	0.173499	FIS1
ENSG00000158850	1	161141100	161147287	16	9	146255	1.5784	0.057234	B4GALT3	0.238005	FIS1
ENSG00000158859	1	161154098	161168846	40	17	146282	1.8164	0.034652	ADAMTS4	0.180811	FIS1
ENSG00000158864	1	161166894	161184185	62	27	146214	1.8758	0.03034	NDUFS2	0.168669	FIS1
ENSG00000158869	1	161185024	161190489	21	9	145138	0.58158	0.28042	FCER1G	0.530571	FIS1
ENSG00000268387	1	161190160	161192296	10	4	144580	1.0249	0.1527	AL590714.1	0.394927	FIS1
ENSG00000158874	1	161192082	161193421	5	3	145698	0.26616	0.39506	APOA2	0.62357	FIS1
ENSG00000158882	1	161195793	161200408	8	5	145585	-0.0001695	0.50007	TOMM40L	0.695314	FIS1
ENSG00000143257	1	161199456	161208092	32	11	145725	0.22824	0.40973	NR1I3	0.633262	FIS1
ENSG00000248485	1	161228517	161255240	102	20	145610	1.3134	0.094519	PCP4L1	0.311481	FIS1
ENSG00000158887	1	161274525	161279762	17	7	143559	-0.15917	0.56323	MPZ	0.735813	FIS1
ENSG00000143252	1	161284047	161332984	254	11	146135	1.1879	0.11744	SDHC	0.347938	FIS1
ENSG00000188931	1	161334521	161337664	21	3	146231	1.1516	0.12473	C1orf192	0.357303	FIS1
ENSG00000143226	1	161475220	161493803	63	16	144809	1.2631	0.10328	FCGR2A	0.324506	FIS1
ENSG00000173110	1	161494036	161496681	11	6	145437	1.0493	0.14701	HSPA6	0.387434	FIS1
ENSG00000203747	1	161511549	161600917	97	42	144631	0.86719	0.19292	FCGR3A	0.443913	FIS1
ENSG00000072694	1	161551101	161648444	81	40	144842	0.64704	0.2588	FCGR2B	0.511365	FIS1
ENSG00000162747	1	161592986	161601753	10	6	145488	0.83531	0.20177	FCGR3B	0.452669	FIS1
ENSG00000132185	1	161676762	161684142	39	10	146041	0.38294	0.35088	FCRLA	0.591031	FIS1
ENSG00000162746	1	161691353	161697933	41	12	145753	-1.0074	0.84314	FCRLB	0.903685	FIS1
ENSG00000081721	1	161719548	161727028	36	9	145853	2.9221	0.0017385	DUSP12	0.0285161	FIS1
ENSG00000118217	1	161736084	161933860	703	28	146080	1.7658	0.038712	ATF6	0.191392	FIS1
ENSG00000162745	1	161952982	161993644	182	41	145281	2.4461	0.0072214	OLFML2B	0.0714427	FIS1
ENSG00000198929	1	162039564	162353321	1392	88	145639	2.3773	0.0087207	NOS1AP	0.0808172	FIS1
ENSG00000254706	1	162335197	162351905	75	26	145386	1.4736	0.070297	RP11-565P22.6	0.265026	FIS1
ENSG00000239887	1	162336698	162356600	88	28	145169	0.85701	0.19572	C1orf226	0.446334	FIS1
ENSG00000171722	1	162342993	162346660	29	12	145146	1.6719	0.04727	C1orf111	0.214354	FIS1
ENSG00000198574	1	162365056	162381928	75	13	145456	-0.72998	0.7673	SH2D1B	0.860061	FIS1
ENSG00000152332	1	162467041	162499419	108	11	145916	1.018	0.15434	UHMK1	0.397006	FIS1
ENSG00000117143	1	162531323	162569627	98	22	145283	2.9567	0.0015546	UAP1	0.0262518	FIS1
ENSG00000162733	1	162601163	162757190	543	46	145915	-0.3683	0.64368	DDR2	0.785012	FIS1
ENSG00000132196	1	162760492	162782607	54	21	145048	-0.78063	0.78249	HSD17B7	0.86833	FIS1
ENSG00000185860	1	162794248	162838605	255	39	145715	-0.15487	0.56154	C1orf110	0.734949	FIS1
ENSG00000117152	1	163038565	163046592	20	9	145740	0.27526	0.39156	RGS4	0.621079	FIS1
ENSG00000143248	1	163080911	163291577	1006	66	145913	0.10682	0.45746	RGS5	0.665499	FIS1
ENSG00000143228	1	163236366	163325554	487	40	146199	-0.31788	0.62471	NUF2	0.774039	FIS1
ENSG00000185630	1	164524821	164868533	1201	164	145392	-0.14413	0.5573	PBX1	0.732777	FIS1
ENSG00000162761	1	165171104	165325952	663	69	145528	-0.1178	0.54689	LMX1A	0.726154	FIS1
ENSG00000143171	1	165370159	165414433	215	33	145185	0.86425	0.19373	RXRG	0.444802	FIS1
ENSG00000162763	1	165513244	165533198	110	23	146016	-0.82713	0.79592	LRRC52	0.875503	FIS1
ENSG00000143198	1	165600098	165631033	198	30	145920	-0.21228	0.58406	MGST3	0.749653	FIS1
ENSG00000143149	1	165631453	165668100	180	24	145492	-0.72054	0.7644	ALDH9A1	0.858337	FIS1
ENSG00000143183	1	165696032	165796992	293	53	145774	1.1338	0.12843	TMCO1	0.362401	FIS1
ENSG00000143179	1	165796768	165880855	277	42	145454	0.92648	0.1771	UCK2	0.426068	FIS1
ENSG00000188859	1	166026674	166136206	407	36	146024	0.052096	0.47923	FAM78B	0.681026	FIS1
ENSG00000267884	1	166026679	166028709	7	3	145896	0.036552	0.48542	AL626787.1	0.685384	FIS1
ENSG00000143157	1	166808681	166825581	43	13	145606	1.0333	0.15073	POGK	0.391989	FIS1
ENSG00000152382	1	166825747	166845564	100	15	145531	-0.669	0.74825	TADA1	0.848658	FIS1
ENSG00000143195	1	166882443	166944719	155	33	146057	0.98983	0.16113	ILDR2	0.406203	FIS1
ENSG00000143194	1	166958346	166991451	109	22	146003	0.15498	0.43842	MAEL	0.65324	FIS1
ENSG00000143167	1	167022073	167059868	151	32	145526	1.4547	0.072878	GPA33	0.270133	FIS1
ENSG00000198842	1	167063282	167098402	159	26	145798	2.4788	0.0065921	DUSP27	0.0676612	FIS1
ENSG00000143190	1	167190066	167396582	585	38	145973	0.43975	0.33006	POU2F1	0.5745	FIS1
ENSG00000198821	1	167399877	167487847	376	80	145349	0.46974	0.31927	CD247	0.565304	FIS1
ENSG00000143162	1	167498914	167523004	127	26	145256	0.50572	0.30653	CREG1	0.554383	FIS1
ENSG00000198771	1	167599330	167675486	372	72	145485	2.6754	0.0037319	RCSD1	0.0480041	FIS1
ENSG00000197965	1	167690429	167761156	259	34	145208	3.191	0.00070896	MPZL1	0.0151038	FIS1
ENSG00000143199	1	167778625	167883453	490	76	145507	0.72006	0.23574	ADCY10	0.488029	FIS1
ENSG00000143158	1	167885967	167906278	42	13	146020	0.35466	0.36142	MPC2	0.598335	FIS1
ENSG00000143164	1	167905021	168045081	353	39	146125	0.50407	0.3071	DCAF6	0.554776	FIS1
ENSG00000143147	1	168053997	168106821	151	26	145604	0.1393	0.44461	GPR161	0.657273	FIS1
ENSG00000143155	1	168148171	168169950	80	13	146121	2.212	0.013483	TIPRL	0.106156	FIS1
ENSG00000213064	1	168195176	168222263	72	16	145685	2.6503	0.0040214	SFT2D2	0.0501049	FIS1
ENSG00000143178	1	168250278	168283664	132	31	145304	1.9861	0.023514	TBX19	0.14544	FIS1
ENSG00000143185	1	168510003	168513235	14	6	145786	1.6786	0.046614	XCL2	0.212482	FIS1
ENSG00000143184	1	168545711	168551315	24	7	143472	1.4463	0.074049	XCL1	0.27276	FIS1
ENSG00000143196	1	168664697	168698502	176	31	145873	-0.36419	0.64214	DPT	0.783893	FIS1
ENSG00000143153	1	169074935	169101960	125	28	145652	0.39624	0.34596	ATP1B1	0.587945	FIS1
ENSG00000143156	1	169101769	169337205	1076	37	146012	0.10214	0.45932	NME7	0.667016	FIS1
ENSG00000117475	1	169337208	169365778	106	20	146302	0.326	0.37221	BLZF1	0.607307	FIS1
ENSG00000117477	1	169364108	169429907	235	31	146145	-0.33105	0.6297	CCDC181	0.776786	FIS1
ENSG00000117479	1	169433147	169455241	46	16	144721	0.59986	0.2743	SLC19A2	0.525144	FIS1
ENSG00000198734	1	169483404	169555826	396	39	146061	-0.9325	0.82446	F5	0.892976	FIS1
ENSG00000174175	1	169558087	169599431	171	39	145904	0.38119	0.35153	SELP	0.591459	FIS1
ENSG00000000460	1	169631245	169823221	1039	40	145959	-1.2738	0.89864	C1orf112	0.935267	FIS1
ENSG00000188404	1	169659808	169680839	107	18	146184	-1.6176	0.94713	SELL	0.965212	FIS1
ENSG00000007908	1	169691781	169733846	312	16	146132	-0.47476	0.68252	SELE	0.8097	FIS1
ENSG00000171806	1	169761670	169764107	7	3	146328	-1.6812	0.95364	METTL18	0.969285	FIS1
ENSG00000000457	1	169818772	169863408	197	23	145903	-1.0612	0.85571	SCYL3	0.911574	FIS1
ENSG00000075945	1	169890467	170054349	631	23	145991	-1.4662	0.9287	KIFAP3	0.954273	FIS1
ENSG00000203740	1	170115142	170136931	84	19	146065	-0.84317	0.80043	METTL11B	0.878379	FIS1
ENSG00000120370	1	170501270	170522587	52	19	145808	-0.55234	0.70964	GORAB	0.825394	FIS1
ENSG00000116132	1	170631869	170708560	184	42	145367	0.15243	0.43943	PRRX1	0.653971	FIS1
ENSG00000117501	1	170904612	171033906	557	36	145539	0.94734	0.17173	MROH9	0.419759	FIS1
ENSG00000007933	1	171060018	171086959	123	19	146144	1.8251	0.03399	FMO3	0.179156	FIS1
ENSG00000117507	1	171106879	171130707	117	14	145864	2.6489	0.0040375	FMO6P	0.0502012	FIS1
ENSG00000094963	1	171154347	171181822	167	18	146351	1.3614	0.086689	FMO2	0.298211	FIS1
ENSG00000010932	1	171217638	171255117	142	32	145665	1.4419	0.074659	FMO1	0.273944	FIS1
ENSG00000076258	1	171283347	171311223	58	18	145878	2.088	0.0184	FMO4	0.126616	FIS1
ENSG00000117523	1	171454651	171562650	337	29	146137	2.8101	0.0024763	PRRC2C	0.0366997	FIS1
ENSG00000034971	1	171604557	171621823	83	15	145776	2.1452	0.015969	MYOC	0.116192	FIS1
ENSG00000117533	1	171669300	171711387	123	17	146048	3.1166	0.00091467	VAMP4	0.017985	FIS1
ENSG00000010165	1	171750788	171783163	116	10	146284	3.7728	8.0718e-05	METTL13	0.00321105	FIS1
ENSG00000197959	1	171810621	172387606	1761	103	145837	0.030853	0.48769	DNM3	0.686603	FIS1
ENSG00000135845	1	172339329	172413230	204	34	145706	-0.82929	0.79653	PIGC	0.875988	FIS1
ENSG00000180999	1	172389828	172437971	169	27	145718	-0.87882	0.81025	C1orf105	0.885511	FIS1
ENSG00000094975	1	172501489	172580971	176	38	145911	-0.89945	0.81579	SUCO	0.888146	FIS1
ENSG00000117560	1	172628154	172636014	16	8	145772	0.14801	0.44117	FASLG	0.655476	FIS1
ENSG00000120337	1	173009100	173020103	36	8	145921	-1.9776	0.97601	TNFSF18	0.98361	FIS1
ENSG00000117586	1	173152873	173176452	82	18	145667	-0.63058	0.73584	TNFSF4	0.841214	FIS1
ENSG00000117592	1	173446405	173457946	22	8	145928	1.0911	0.13762	PRDX6	0.375005	FIS1
ENSG00000162753	1	173469603	173572233	316	23	145931	2.3649	0.0090174	SLC9C2	0.0823154	FIS1
ENSG00000183831	1	173578700	173639001	142	21	145855	1.3698	0.085372	ANKRD45	0.295348	FIS1
ENSG00000076321	1	173684080	173755840	159	27	145752	0.098991	0.46057	KLHL20	0.667841	FIS1
ENSG00000120334	1	173768688	173793858	57	13	145933	-0.53075	0.70221	CENPL	0.821353	FIS1
ENSG00000117593	1	173793641	173827684	64	14	146049	0.36308	0.35827	DARS2	0.595903	FIS1
ENSG00000185278	1	173837220	173872687	111	17	146024	0.4793	0.31586	ZBTB37	0.562625	FIS1
ENSG00000117601	1	173872947	173886516	37	10	145580	0.86925	0.19235	SERPINC1	0.443358	FIS1
ENSG00000135870	1	173900352	173991435	212	21	145991	-0.13422	0.55339	RC3H1	0.730176	FIS1
ENSG00000152061	1	174128548	174964445	2276	36	145896	1.1464	0.12582	RABGAP1L	0.359278	FIS1
ENSG00000203737	1	174417212	174418683	2	1	145685	-0.99778	0.84081	GPR52	0.902079	FIS1
ENSG00000116161	1	174968300	174980851	35	14	145782	-0.59747	0.7249	CACYBP	0.834616	FIS1
ENSG00000120333	1	174979925	174992561	40	14	145653	-0.28313	0.61146	MRPS14	0.766749	FIS1
ENSG00000120332	1	175036994	175117202	363	41	145905	-0.12956	0.55154	TNN	0.729263	FIS1
ENSG00000235750	1	175126123	175162135	135	20	145787	1.1073	0.13408	KIAA0040	0.370379	FIS1
ENSG00000116147	1	175284330	175712906	1710	176	145617	1.6375	0.050761	TNR	0.222872	FIS1
ENSG00000143207	1	175913967	176176629	822	39	146168	1.9234	0.027217	RFWD2	0.158926	FIS1
ENSG00000116183	1	176432307	176814735	1083	59	145769	1.3955	0.081426	PAPPA2	0.287711	FIS1
ENSG00000152092	1	176826438	177134109	955	86	145583	-0.13161	0.55236	ASTN1	0.729786	FIS1
ENSG00000198797	1	177140633	177251558	266	39	145879	2.2425	0.012464	BRINP2	0.101404	FIS1
ENSG00000120341	1	177893091	177953438	289	47	145880	0.29627	0.38351	SEC16B	0.614657	FIS1
ENSG00000075391	1	178062864	178448644	927	45	146085	0.14482	0.44243	RASAL2	0.655942	FIS1
ENSG00000240021	1	178482212	178517734	126	21	146111	0.89144	0.18635	TEX35	0.436969	FIS1
ENSG00000213057	1	178511887	178518024	33	6	146241	0.48723	0.31305	C1orf220	0.560064	FIS1
ENSG00000184909	1	178511950	178517579	28	5	146269	0.51119	0.30461	C1ORF220	0.552727	FIS1
ENSG00000116191	1	178694300	178889238	538	35	146160	-0.13407	0.55333	RALGPS2	0.730148	FIS1
ENSG00000116194	1	178818840	178840187	44	15	146114	-0.7668	0.7784	ANGPTL1	0.86603	FIS1
ENSG00000116199	1	178994939	179045697	201	28	146057	1.2519	0.1053	FAM20B	0.327587	FIS1
ENSG00000186283	1	179050512	179067158	60	19	145846	2.1977	0.013986	TOR3A	0.108373	FIS1
ENSG00000143322	1	179068462	179198819	383	33	146069	2.1115	0.017364	ABL2	0.122121	FIS1
ENSG00000057252	1	179262925	179327815	310	26	145965	0.8873	0.18746	SOAT1	0.437855	FIS1
ENSG00000162779	1	179334855	179523870	1121	26	146122	1.5634	0.058976	AXDND1	0.242271	FIS1
ENSG00000269064	1	179443716	179457805	121	10	146280	1.6114	0.053546	AL160286.1	0.229511	FIS1
ENSG00000116218	1	179519674	179545087	121	19	145439	1.2459	0.1064	NPHS2	0.32965	FIS1
ENSG00000162782	1	179560748	179660407	350	24	145929	0.028794	0.48851	TDRD5	0.687026	FIS1
ENSG00000143340	1	179712298	179785333	334	47	145254	0.29708	0.3832	FAM163A	0.614541	FIS1
ENSG00000169905	1	179809102	179846938	112	20	146205	1.3523	0.088144	TOR1AIP2	0.300662	FIS1
ENSG00000258664	1	179833916	179834311	2	1	145890	-0.057449	0.52291	IFRG15	0.710397	FIS1
ENSG00000143337	1	179851177	179894135	162	24	146086	2.2443	0.012407	TOR1AIP1	0.101233	FIS1
ENSG00000135837	1	179923873	180084015	556	33	146156	0.80914	0.20922	CEP350	0.460418	FIS1
ENSG00000116260	1	180123969	180173165	306	28	146097	0.97672	0.16435	QSOX1	0.410625	FIS1
ENSG00000121454	1	180199421	180249380	259	53	145361	2.1761	0.014773	LHX4	0.112109	FIS1
ENSG00000135847	1	180244515	180472089	839	35	146124	1.1172	0.13195	ACBD6	0.367476	FIS1
ENSG00000143324	1	180601140	180859387	688	53	145952	2.0385	0.020752	XPR1	0.135638	FIS1
ENSG00000135835	1	180882290	180920750	150	41	145401	1.4038	0.080183	KIAA1614	0.285032	FIS1
ENSG00000234237	1	180941695	180949868	17	6	145751	-1.2235	0.88944	AL162431.1	0.93086	FIS1
ENSG00000135823	1	180941861	180992047	121	22	145945	-1.3213	0.9068	STX6	0.940186	FIS1
ENSG00000153029	1	181003067	181031074	118	31	145817	-0.18566	0.57365	MR1	0.742953	FIS1
ENSG00000162783	1	181057638	181059977	11	5	145263	-0.53479	0.7036	IER5	0.822012	FIS1
ENSG00000198216	1	181382238	181777219	1415	128	145751	3.6067	0.00015506	CACNA1E	0.00507348	FIS1
ENSG00000179930	1	182023705	182030847	16	5	146283	3.0644	0.0010906	ZNF648	0.0203435	FIS1
ENSG00000135821	1	182350839	182361341	43	11	145377	1.1666	0.12168	GLUL	0.353842	FIS1
ENSG00000203730	1	182367252	182369751	11	4	146446	0.6409	0.26079	TEDDM1	0.512866	FIS1
ENSG00000121446	1	182419256	182529734	435	28	146012	1.4576	0.072469	RGSL1	0.269666	FIS1
ENSG00000135828	1	182542769	182558391	43	18	145467	1.2177	0.11166	RNASEL	0.337757	FIS1
ENSG00000143333	1	182567758	182573543	16	8	146046	0.066347	0.47355	RGS16	0.677227	FIS1
ENSG00000135824	1	182615239	182653711	131	21	146122	0.72119	0.2354	RGS8	0.487679	FIS1
ENSG00000135838	1	182758428	182799519	152	24	146124	-1.4715	0.92942	NPL	0.954744	FIS1
ENSG00000135829	1	182808504	182856886	170	33	146133	-0.59669	0.72464	DHX9	0.83452	FIS1
ENSG00000157060	1	182869000	182922660	152	27	146054	-0.98879	0.83862	SHCBP1L	0.901295	FIS1
ENSG00000135862	1	182992595	183114727	528	16	146211	-1.3707	0.91477	LAMC1	0.945544	FIS1
ENSG00000058085	1	183155373	183214035	263	22	145514	2.2667	0.011705	LAMC2	0.0980397	FIS1
ENSG00000157064	1	183217372	183387737	621	52	145504	3.6734	0.00011968	NMNAT2	0.00421131	FIS1
ENSG00000116698	1	183441351	183567381	335	50	145979	2.7758	0.0027531	SMG7	0.0395308	FIS1
ENSG00000116701	1	183524698	183560011	121	31	145933	1.8246	0.034033	NCF2	0.179333	FIS1
ENSG00000162704	1	183592401	183604892	78	4	146265	0.29779	0.38293	ARPC5	0.614469	FIS1
ENSG00000143344	1	183605220	183897665	1069	77	145955	-0.40233	0.65628	RGL1	0.79311	FIS1
ENSG00000173627	1	183615541	183622451	43	4	146287	0.49864	0.30902	APOBEC4	0.556531	FIS1
ENSG00000198756	1	183898796	184006863	422	52	145458	-0.15127	0.56012	COLGALT2	0.734079	FIS1
ENSG00000198860	1	184020811	184043346	52	21	145508	0.027462	0.48905	TSEN15	0.687265	FIS1
ENSG00000116667	1	184356192	184598154	822	57	145762	0.50123	0.30811	C1orf21	0.555804	FIS1
ENSG00000116406	1	184659365	184724047	293	13	145944	0.95297	0.1703	EDEM3	0.418327	FIS1
ENSG00000135842	1	184759858	184943682	647	53	145747	2.0928	0.018185	FAM129A	0.125835	FIS1
ENSG00000121481	1	185014496	185071740	150	31	146113	0.070094	0.47206	RNF2	0.676456	FIS1
ENSG00000121486	1	185087220	185126204	116	19	146220	0.83474	0.20193	TRMT1L	0.452917	FIS1
ENSG00000116668	1	185126212	185260897	377	21	146009	0.18981	0.42473	SWT1	0.643807	FIS1
ENSG00000116679	1	185265520	185286461	45	13	145686	-0.22505	0.58903	IVNS1ABP	0.752353	FIS1
ENSG00000143341	1	185703683	186160085	957	63	145849	-1.6074	0.94601	HMCN1	0.964383	FIS1
ENSG00000116690	1	186265405	186283694	35	11	145584	-0.39268	0.65272	PRG4	0.790729	FIS1
ENSG00000047410	1	186280784	186344825	196	29	146167	-0.2099	0.58313	TPR	0.749325	FIS1
ENSG00000157181	1	186344890	186390510	122	29	146107	-0.13195	0.55249	C1orf27	0.729869	FIS1
ENSG00000268662	1	186364123	186365908	1	1	145259	-1.5002	0.93322	AL596220.1	0.956887	FIS1
ENSG00000262180	1	186369704	186370587	5	3	145869	0.54427	0.29313	OCLM	0.542241	FIS1
ENSG00000116703	1	186412698	186430254	42	13	145911	0.48083	0.31532	PDC	0.562421	FIS1
ENSG00000073756	1	186640923	186649559	21	8	145981	0.053074	0.47884	PTGS2	0.680722	FIS1
ENSG00000116711	1	186798085	186958113	632	67	145532	0.47922	0.31589	PLA2G4A	0.562625	FIS1
ENSG00000162670	1	190066792	190446759	1034	57	145791	0.65669	0.25569	BRINP3	0.507993	FIS1
ENSG00000150681	1	192127587	192154945	50	14	145691	0.028829	0.4885	RGS18	0.687026	FIS1
ENSG00000253148	1	192286122	192336415	158	28	145642	1.1433	0.12647	RGS21	0.35996	FIS1
ENSG00000090104	1	192544857	192549161	17	8	145757	0.22522	0.4109	RGS1	0.63424	FIS1
ENSG00000127074	1	192605275	192629390	108	15	145712	1.5994	0.054867	RGS13	0.232772	FIS1
ENSG00000116741	1	192778169	192781403	5	2	145510	2.1543	0.015607	RGS2	0.115109	FIS1
ENSG00000116750	1	192981380	193029237	105	18	146242	2.1645	0.015213	UCHL5	0.11357	FIS1
ENSG00000116747	1	193028552	193060907	81	21	146231	2.3875	0.0084806	TROVE2	0.0793043	FIS1
ENSG00000023572	1	193065598	193075244	27	11	146174	2.6067	0.0045708	GLRX2	0.0546299	FIS1
ENSG00000134371	1	193091147	193223031	428	34	146232	2.3214	0.010132	CDC73	0.0890485	FIS1
ENSG00000162630	1	193148175	193155784	19	7	146322	2.2396	0.01256	B3GALT2	0.101685	FIS1
ENSG00000162687	1	196194909	196578355	1004	42	145971	0.28611	0.3874	KCNT2	0.617279	FIS1
ENSG00000000971	1	196621008	196716634	349	27	146259	2.187	0.014372	CFH	0.110261	FIS1
ENSG00000116785	1	196743925	196763203	13	9	145629	0.17559	0.43031	CFHR3	0.647377	FIS1
ENSG00000244414	1	196788887	196801319	6	4	145286	-1.1117	0.86687	CFHR1	0.917083	FIS1
ENSG00000080910	1	196788898	196928356	250	57	145590	2.0882	0.018388	CFHR2	0.126579	FIS1
ENSG00000134365	1	196819371	196888102	128	40	145513	2.3896	0.0084343	CFHR4	0.0790297	FIS1
ENSG00000134389	1	196946667	196978804	96	25	146131	1.2148	0.11222	CFHR5	0.338631	FIS1
ENSG00000143278	1	197008321	197036397	68	11	146198	0.32085	0.37416	F13B	0.60853	FIS1
ENSG00000066279	1	197053258	197115824	130	16	146262	0.65131	0.25742	ASPM	0.509915	FIS1
ENSG00000177888	1	197122810	197169672	112	21	145848	-0.026441	0.51055	ZBTB41	0.702201	FIS1
ENSG00000134376	1	197170592	197447585	602	63	145930	-0.55545	0.71071	CRB1	0.825978	FIS1
ENSG00000213047	1	197473878	197744826	508	34	145916	0.11727	0.45332	DENND1B	0.662785	FIS1
ENSG00000203724	1	197871777	197876497	9	6	144954	-1.4541	0.92704	C1orf53	0.953231	FIS1
ENSG00000143355	1	197881037	197904608	69	21	145918	-0.15926	0.56327	LHX9	0.735814	FIS1
ENSG00000151414	1	198126093	198291550	606	35	146124	0.93426	0.17509	NEK7	0.424058	FIS1
ENSG00000151418	1	198492352	198510075	53	19	145999	1.2623	0.10342	ATP6V1G3	0.32473	FIS1
ENSG00000081237	1	198607801	198726545	415	43	145846	-0.57492	0.71733	PTPRC	0.83025	FIS1
ENSG00000116833	1	199996730	200146552	714	84	145493	-0.60585	0.72769	NR5A2	0.836486	FIS1
ENSG00000162702	1	200374068	200379184	4	2	145761	0.45398	0.32492	ZNF281	0.570002	FIS1
ENSG00000118193	1	200520628	200589862	274	25	146096	0.43183	0.33293	KIF14	0.576489	FIS1
ENSG00000118197	1	200593024	200639097	174	29	145997	0.74271	0.22883	DDX59	0.480068	FIS1
ENSG00000118200	1	200708686	200829832	344	32	146067	1.7505	0.040012	CAMSAP2	0.195244	FIS1
ENSG00000170128	1	200842083	200843306	5	3	144371	1.2441	0.10673	GPR25	0.330124	FIS1
ENSG00000163362	1	200860176	200884863	95	27	145308	2.5499	0.0053875	C1orf106	0.0608865	FIS1
ENSG00000116852	1	200938520	200992828	213	31	145959	1.8198	0.034397	KIF21B	0.180343	FIS1
ENSG00000081248	1	201008642	201081694	338	64	145554	0.32291	0.37338	CACNA1S	0.607994	FIS1
ENSG00000232237	1	201083081	201096312	55	17	145813	0.63015	0.2643	ASCL5	0.516198	FIS1
ENSG00000116857	1	201103900	201140702	169	33	145466	0.12098	0.45185	TMEM9	0.661924	FIS1
ENSG00000163395	1	201159953	201198080	178	36	145784	1.3155	0.09417	IGFN1	0.310977	FIS1
ENSG00000081277	1	201252580	201302121	268	21	145708	0.87985	0.18947	PKP1	0.440419	FIS1
ENSG00000118194	1	201328136	201346890	99	17	146135	0.41882	0.33767	TNNT2	0.580848	FIS1
ENSG00000159166	1	201342372	201368736	114	22	145834	-0.12579	0.55005	LAD1	0.728581	FIS1
ENSG00000159173	1	201373625	201398994	75	27	145473	-2.2199	0.98679	TNNI1	0.991091	FIS1
ENSG00000174307	1	201434620	201438365	17	9	144959	-0.18096	0.5718	PHLDA3	0.741778	FIS1
ENSG00000159176	1	201452658	201478584	143	26	145062	-0.097438	0.53881	CSRP1	0.721161	FIS1
ENSG00000269690	1	201592013	201592738	1	1	145782	1.465	0.071456	AC096677.1	0.267436	FIS1
ENSG00000134369	1	201592411	201796102	653	72	145528	0.93356	0.17527	NAV1	0.424276	FIS1
ENSG00000198700	1	201798269	201853422	153	38	146035	4.3044	8.3726e-06	IPO9	0.00059254	FIS1
ENSG00000198892	1	201857808	201861434	11	6	146278	3.2842	0.00051129	SHISA4	0.0118456	FIS1
ENSG00000163431	1	201865580	201915715	164	37	145651	3.2928	0.00049592	LMOD1	0.0115833	FIS1
ENSG00000134375	1	201924619	201939789	46	12	145535	3.9914	3.2843e-05	TIMM17A	0.00174038	FIS1
ENSG00000176393	1	201951500	201975275	139	21	145384	2.2539	0.0121	RNPEP	0.0998871	FIS1
ENSG00000163435	1	201977073	201986316	32	13	144883	0.92378	0.1778	ELF3	0.426792	FIS1
ENSG00000170075	1	202091986	202102720	58	18	145456	1.5688	0.05835	GPR37L1	0.240633	FIS1
ENSG00000143862	1	202102532	202113869	31	14	145633	1.6898	0.045532	ARL8A	0.210514	FIS1
ENSG00000143851	1	202116141	202130716	50	21	145124	1.7363	0.041253	PTPN7	0.198625	FIS1
ENSG00000133067	1	202163029	202288909	410	50	145398	1.0548	0.14576	LGR6	0.385672	FIS1
ENSG00000077152	1	202300785	202311108	20	7	146344	2.0309	0.021135	UBE2T	0.136868	FIS1
ENSG00000077157	1	202317827	202561834	577	40	146068	2.3011	0.010692	PPP1R12B	0.0926874	FIS1
ENSG00000143858	1	202559724	202679545	394	65	145619	0.43948	0.33016	SYT2	0.5745	FIS1
ENSG00000117139	1	202696526	202778598	267	25	146042	0.49968	0.30865	KDM5B	0.556353	FIS1
ENSG00000184774	1	202789394	202796353	29	5	146178	1.8188	0.034467	RP11-480I12.4	0.180389	FIS1
ENSG00000183155	1	202848085	202858263	31	9	145955	0.31958	0.37464	RABIF	0.608858	FIS1
ENSG00000117153	1	202860228	202897764	100	14	146238	0.53354	0.29683	KLHL12	0.545295	FIS1
ENSG00000159346	1	202909951	202927700	68	17	146118	-1.2988	0.903	ADIPOR1	0.937481	FIS1
ENSG00000159348	1	202930997	202936408	12	4	146364	-1.1509	0.87511	CYB5R1	0.921846	FIS1
ENSG00000163444	1	202976514	202993976	42	12	145960	0.57831	0.28153	TMEM183A	0.531607	FIS1
ENSG00000143847	1	202995626	203047868	207	36	145706	2.0289	0.021234	PPFIA4	0.137112	FIS1
ENSG00000122180	1	203052260	203055164	16	8	144769	0.79735	0.21262	MYOG	0.463763	FIS1
ENSG00000163485	1	203059782	203136533	244	45	145616	0.66531	0.25293	ADORA1	0.505512	FIS1
ENSG00000133055	1	203136939	203144941	29	11	145095	0.93505	0.17488	MYBPH	0.423924	FIS1
ENSG00000133048	1	203148059	203155877	37	9	145027	-0.61494	0.7307	CHI3L1	0.838382	FIS1
ENSG00000133063	1	203181955	203242769	230	48	145522	-0.28834	0.61346	CHIT1	0.768263	FIS1
ENSG00000159388	1	203274619	203278730	7	3	146133	0.3127	0.37726	BTG2	0.610648	FIS1
ENSG00000122176	1	203309756	203320617	51	18	145312	-1.0316	0.84887	FMOD	0.907175	FIS1
ENSG00000188783	1	203444956	203460480	60	13	145941	2.7583	0.0029051	PRELP	0.0408747	FIS1
ENSG00000188770	1	203463271	203477992	63	13	145854	2.1904	0.014249	OPTC	0.10954	FIS1
ENSG00000058668	1	203595689	203713209	396	58	145491	1.8494	0.032203	ATP2B4	0.174308	FIS1
ENSG00000122188	1	203734304	203745361	41	6	145331	-0.25629	0.60114	LAX1	0.760063	FIS1
ENSG00000058673	1	203764782	203823252	199	20	145607	0.14612	0.44191	ZC3H11A	0.655789	FIS1
ENSG00000257315	1	203765437	203769686	12	6	145658	-1.1357	0.87196	ZBED6	0.920171	FIS1
ENSG00000182004	1	203830731	203839678	40	8	145992	1.5057	0.066067	SNRPE	0.256451	FIS1
ENSG00000143842	1	204042243	204096863	197	58	145086	0.46024	0.32267	SOX13	0.567865	FIS1
ENSG00000143845	1	204100190	204121307	68	31	145331	0.8892	0.18695	ETNK2	0.437491	FIS1
ENSG00000143839	1	204123944	204135465	49	12	145598	-0.45381	0.67502	REN	0.8052	FIS1
ENSG00000170498	1	204159469	204165614	24	6	145483	0.030848	0.4877	KISS1	0.686603	FIS1
ENSG00000174567	1	204167288	204183220	52	18	145600	0.22061	0.4127	GOLT1A	0.635439	FIS1
ENSG00000143850	1	204187979	204346793	655	52	145857	-0.094299	0.53756	PLEKHA6	0.720151	FIS1
ENSG00000158615	1	204372515	204380919	19	8	145719	1.3754	0.084503	PPP1R15B	0.293686	FIS1
ENSG00000133056	1	204391756	204463852	283	38	145922	0.026058	0.48961	PIK3C2B	0.687499	FIS1
ENSG00000198625	1	204485511	204542871	247	35	146131	1.712	0.043446	MDM4	0.204468	FIS1
ENSG00000170382	1	204586298	204654861	277	38	145297	0.73349	0.23163	LRRN2	0.483366	FIS1
ENSG00000163531	1	204797779	204991950	819	77	145538	-0.48145	0.6849	NFASC	0.81125	FIS1
ENSG00000184144	1	205012325	205047627	167	27	145879	2.2441	0.012413	CNTN2	0.101233	FIS1
ENSG00000174529	1	205052258	205053645	7	3	146417	1.5914	0.055755	TMEM81	0.234538	FIS1
ENSG00000117222	1	205055270	205091143	137	24	146237	1.7492	0.040124	RBBP5	0.195509	FIS1
ENSG00000133059	1	205111632	205180727	208	26	146174	1.3018	0.096491	DSTYK	0.314397	FIS1
ENSG00000133069	1	205197304	205242471	169	26	146070	1.7848	0.037146	TMCC2	0.187587	FIS1
ENSG00000163545	1	205271187	205290883	74	23	145761	2.1802	0.014622	NUAK2	0.11141	FIS1
ENSG00000162873	1	205305220	205326218	114	21	145110	0.34961	0.36332	KLHDC8A	0.599694	FIS1
ENSG00000186007	1	205350506	205425082	254	40	145164	0.037708	0.48496	LEMD1	0.685042	FIS1
ENSG00000117266	1	205473723	205501921	146	41	145512	3.7401	9.198e-05	CDK18	0.00350414	FIS1
ENSG00000174514	1	205538013	205572046	152	29	145809	3.7416	9.1433e-05	MFSD4	0.0034974	FIS1
ENSG00000158711	1	205577071	205601090	66	15	145706	1.7894	0.036772	ELK4	0.186867	FIS1
ENSG00000158715	1	205626979	205649587	86	29	145869	0.73527	0.23109	SLC45A3	0.482707	FIS1
ENSG00000069275	1	205681947	205719404	124	31	146097	1.7479	0.040237	NUCKS1	0.195807	FIS1
ENSG00000268313	1	205682497	205684153	4	2	146062	2.2703	0.011596	AC119673.1	0.0975676	FIS1
ENSG00000117280	1	205737114	205744588	34	10	146058	1.2895	0.098605	RAB7L1	0.317851	FIS1
ENSG00000133065	1	205758221	205782876	81	23	145991	1.3654	0.086068	SLC41A1	0.296886	FIS1
ENSG00000162877	1	205797150	205819260	68	25	145791	0.52899	0.29841	PM20D1	0.547027	FIS1
ENSG00000174502	1	205882176	205912588	173	32	145168	-2.1149	0.98278	SLC26A9	0.988417	FIS1
ENSG00000196550	1	206136916	206155151	2	1	144310	-0.14963	0.55947	FAM72A	0.733805	FIS1
ENSG00000198049	1	206223976	206231639	52	8	145630	0.45128	0.32589	AVPR1B	0.570927	FIS1
ENSG00000196533	1	206238872	206288647	126	23	145736	-0.45483	0.67538	C1orf186	0.805418	FIS1
ENSG00000196188	1	206317459	206332104	22	8	144901	0.89812	0.18456	CTSE	0.435169	FIS1
ENSG00000163486	1	206516200	206637783	216	24	145918	0.69608	0.24319	SRGAP2	0.495579	FIS1
ENSG00000143466	1	206643791	206670223	112	31	145386	0.25223	0.40043	IKBKE	0.627303	FIS1
ENSG00000162888	1	206664449	206671061	35	10	145970	1.2627	0.10335	C1orf147	0.324618	FIS1
ENSG00000136653	1	206680879	206762616	253	37	145296	3.6795	0.00011683	RASSF5	0.00413628	FIS1
ENSG00000143486	1	206744620	206785904	142	30	144807	2.4234	0.0076871	EIF2D	0.0741477	FIS1
ENSG00000143479	1	206808881	206857764	166	31	145609	1.0464	0.1477	DYRK3	0.388008	FIS1
ENSG00000162889	1	206858289	206907628	167	37	145983	1.3128	0.094632	MAPKAPK2	0.311606	FIS1
ENSG00000136634	1	206940947	206945839	22	8	146052	1.487	0.068512	IL10	0.261223	FIS1
ENSG00000142224	1	206972215	207016324	154	29	145813	1.4965	0.067263	IL19	0.258544	FIS1
ENSG00000162891	1	207038699	207042568	9	5	145636	-0.7197	0.76415	IL20	0.858204	FIS1
ENSG00000162892	1	207070788	207077484	20	6	146165	-0.78413	0.78352	IL24	0.868872	FIS1
ENSG00000162894	1	207077731	207096592	42	11	145718	-0.51091	0.69529	FAIM3	0.817357	FIS1
ENSG00000162896	1	207101863	207119811	62	17	146124	-0.81907	0.79363	PIGR	0.874326	FIS1
ENSG00000162897	1	207131310	207143970	53	9	146279	-0.45803	0.67654	FCAMR	0.805742	FIS1
ENSG00000182795	1	207191866	207206101	52	8	146176	1.2049	0.11412	C1orf116	0.342396	FIS1
ENSG00000180667	1	207217194	207226325	22	9	145986	0.76591	0.22186	YOD1	0.473008	FIS1
ENSG00000123836	1	207222801	207254369	62	14	145669	1.4317	0.076108	PFKFB2	0.276715	FIS1
ENSG00000123843	1	207262187	207273338	29	13	146053	1.4979	0.067084	C4BPB	0.258224	FIS1
ENSG00000123838	1	207277607	207318317	135	28	145656	0.50532	0.30667	C4BPA	0.554477	FIS1
ENSG00000196352	1	207494853	207534311	107	16	146060	0.37505	0.35381	CD55	0.593063	FIS1
ENSG00000117322	1	207627575	207663240	117	23	145938	0.097689	0.46109	CR2	0.668288	FIS1
ENSG00000203710	1	207669492	207813992	319	33	145813	2.1419	0.016101	CR1	0.116595	FIS1
ENSG00000197721	1	207818458	207911761	354	28	145854	2.4571	0.0070026	CR1L	0.0703836	FIS1
ENSG00000117335	1	207925402	207968858	128	23	145979	1.9348	0.026507	CD46	0.156487	FIS1
ENSG00000174059	1	208057594	208084747	118	25	145812	-0.31729	0.62449	CD34	0.773997	FIS1
ENSG00000076356	1	208195587	208417665	849	88	145632	0.45417	0.32485	PLXNA2	0.570002	FIS1
ENSG00000008118	1	209757062	209787283	130	25	145497	1.1746	0.12007	CAMK1G	0.35116	FIS1
ENSG00000196878	1	209788215	209825811	184	34	145800	0.51108	0.30465	LAMB3	0.552728	FIS1
ENSG00000123689	1	209848765	209849733	3	2	145684	-0.10597	0.5422	G0S2	0.723091	FIS1
ENSG00000117594	1	209859510	209908295	143	26	145913	0.81332	0.20802	HSD11B1	0.459682	FIS1
ENSG00000009790	1	209929377	209955668	103	17	145966	-0.6397	0.73882	TRAF3IP3	0.842582	FIS1
ENSG00000162757	1	209955661	209957904	4	2	146340	0.73551	0.23101	C1orf74	0.482659	FIS1
ENSG00000117595	1	209959036	209979465	71	11	146269	0.89164	0.18629	IRF6	0.436969	FIS1
ENSG00000117597	1	210001352	210030910	125	17	145937	1.2014	0.11479	DIEXF	0.343702	FIS1
ENSG00000143469	1	210111538	210337636	690	43	146022	-1.3326	0.90866	SYT14	0.94134	FIS1
ENSG00000082497	1	210406144	210419976	34	20	146026	-0.014285	0.5057	SERTAD4	0.698684	FIS1
ENSG00000054392	1	210501596	210849638	1707	154	145573	1.8849	0.029725	HHAT	0.166523	FIS1
ENSG00000143473	1	210856555	211307457	1796	115	145786	2.2337	0.012751	KCNH1	0.102558	FIS1
ENSG00000117625	1	211431719	211489727	227	37	146108	0.90762	0.18204	RCOR3	0.432302	FIS1
ENSG00000082512	1	211499957	211548288	150	33	145931	0.983	0.1628	TRAF5	0.408589	FIS1
ENSG00000198570	1	211649864	211666259	63	19	145365	1.7971	0.036157	RD3	0.185241	FIS1
ENSG00000170385	1	211744910	211752084	15	5	145933	0.33074	0.37042	SLC30A1	0.605961	FIS1
ENSG00000117650	1	211836114	211848960	36	10	146134	0.3453	0.36493	NEK2	0.600608	FIS1
ENSG00000123684	1	211916799	212004114	364	34	146087	-1.2938	0.90214	LPGAT1	0.93701	FIS1
ENSG00000143493	1	212113741	212208884	385	26	146231	-0.43209	0.66716	INTS7	0.800372	FIS1
ENSG00000143476	1	212208919	212280742	291	28	146290	-0.48517	0.68622	DTL	0.812195	FIS1
ENSG00000066027	1	212458879	212535200	223	35	145967	1.1961	0.11584	PPP2R5A	0.345309	FIS1
ENSG00000065600	1	212537273	212588243	159	34	145765	0.81281	0.20816	TMEM206	0.459682	FIS1
ENSG00000117691	1	212606229	212619714	62	15	146069	1.2015	0.11478	NENF	0.343702	FIS1
ENSG00000162772	1	212738676	212794119	241	45	145574	0.75963	0.22374	ATF3	0.474819	FIS1
ENSG00000162771	1	212797789	212800120	13	7	146312	-0.54673	0.70772	FAM71A	0.824074	FIS1
ENSG00000123685	1	212859760	212873327	62	21	145718	0.77804	0.21827	BATF3	0.469646	FIS1
ENSG00000117697	1	212899495	212965124	303	17	146232	-0.034263	0.51367	NSL1	0.704581	FIS1
ENSG00000203705	1	212965170	212989968	127	13	146313	-0.065091	0.52595	TATDN3	0.711892	FIS1
ENSG00000185523	1	213003483	213020991	78	15	145804	1.2612	0.10362	C1orf227	0.32502	FIS1
ENSG00000162769	1	213031597	213072705	247	17	146171	1.7252	0.042243	FLVCR1	0.201264	FIS1
ENSG00000143494	1	213123862	213165379	171	36	145662	0.79767	0.21253	VASH2	0.463652	FIS1
ENSG00000174606	1	213165524	213189168	53	16	146128	-0.18124	0.57191	ANGEL2	0.741869	FIS1
ENSG00000136643	1	213224589	213448116	464	47	146062	0.92792	0.17672	RPS6KC1	0.426068	FIS1
ENSG00000117707	1	214156524	214214595	170	33	145693	2.9221	0.0017384	PROX1	0.0285161	FIS1
ENSG00000143499	1	214454445	214510474	236	33	145772	1.8625	0.031269	SMYD2	0.171313	FIS1
ENSG00000152104	1	214522039	214725792	933	94	145621	0.98722	0.16177	PTPN14	0.407031	FIS1
ENSG00000117724	1	214776538	214837931	264	22	146203	-0.29459	0.61585	CENPF	0.770041	FIS1
ENSG00000082482	1	215179118	215410436	898	48	145963	-0.67837	0.75123	KCNK2	0.850677	FIS1
ENSG00000136636	1	215740735	215795149	118	12	146160	-0.80078	0.78837	KCTD3	0.87103	FIS1
ENSG00000042781	1	215796236	216596738	3051	210	145706	0.73817	0.23021	USH2A	0.481626	FIS1
ENSG00000196482	1	216676588	217311097	2667	209	145602	4.6312	1.8175e-06	ESRRG	0.00019186	FIS1
ENSG00000092978	1	217600334	217804424	731	79	145480	1.5411	0.061649	GPATCH2	0.247733	FIS1
ENSG00000162814	1	217804666	218045038	988	52	145810	1.3847	0.083074	SPATA17	0.291291	FIS1
ENSG00000067533	1	218458629	218511325	118	13	145698	-0.19299	0.57652	RRP15	0.745011	FIS1
ENSG00000092969	1	218519577	218617961	276	51	145611	0.39822	0.34523	TGFB2	0.587558	FIS1
ENSG00000228208	1	218683438	218699320	68	7	146118	-0.062359	0.52486	C1orf143	0.711222	FIS1
ENSG00000143353	1	219347186	219386207	91	20	146214	-0.12946	0.5515	LYPLAL1	0.729261	FIS1
ENSG00000196660	1	219858769	220131989	1076	67	145918	-0.25337	0.60001	SLC30A10	0.759447	FIS1
ENSG00000136628	1	220141943	220220000	364	19	146010	0.19945	0.42096	EPRS	0.640899	FIS1
ENSG00000162813	1	220230824	220263804	99	32	145765	1.1241	0.13048	BPNT1	0.365158	FIS1
ENSG00000067704	1	220267444	220321380	166	31	145942	1.6478	0.049692	IARS2	0.220467	FIS1
ENSG00000118873	1	220321635	220445796	332	30	146027	1.3104	0.095035	RAB3GAP2	0.31216	FIS1
ENSG00000224867	1	220603286	220608023	27	6	146306	0.26546	0.39533	AC096644.1	0.623813	FIS1
ENSG00000116141	1	220701568	220837803	349	27	146144	1.2071	0.11369	MARK1	0.341377	FIS1
ENSG00000162817	1	220863187	220872499	44	11	145798	0.77754	0.21842	C1orf115	0.469648	FIS1
ENSG00000117791	1	220921567	220958150	299	12	146185	-0.97967	0.83638	MARC2	0.90024	FIS1
ENSG00000186205	1	220960101	220987735	178	25	145909	-0.011716	0.50467	MARC1	0.698012	FIS1
ENSG00000136630	1	221051699	221058401	25	9	146014	0.4515	0.32581	HLX	0.570927	FIS1
ENSG00000143507	1	221874766	221915518	133	37	145274	1.6606	0.048397	DUSP10	0.217585	FIS1
ENSG00000143512	1	222695602	222721445	138	15	145805	1.5785	0.057231	HHIPL2	0.238005	FIS1
ENSG00000143498	1	222731244	222763275	111	20	145992	1.1695	0.12111	TAF1A	0.352836	FIS1
ENSG00000154305	1	222791428	222841354	163	22	146045	0.67525	0.24976	MIA3	0.502017	FIS1
ENSG00000186063	1	222841355	222886552	101	27	146120	0.97159	0.16563	AIDA	0.412351	FIS1
ENSG00000162819	1	222885895	222908538	49	18	146042	1.333	0.091272	BROX	0.305956	FIS1
ENSG00000197520	1	222910549	222924147	33	16	146055	0.22055	0.41272	FAM177B	0.635439	FIS1
ENSG00000154309	1	222988406	223179337	644	41	145929	-0.0034159	0.50136	DISP1	0.695767	FIS1
ENSG00000187554	1	223282748	223316624	144	19	145502	0.95354	0.17016	TLR5	0.418322	FIS1
ENSG00000143502	1	223394161	223537544	424	41	145499	2.1915	0.014207	SUSD4	0.109306	FIS1
ENSG00000178395	1	223566715	223568812	11	3	146403	0.37044	0.35553	C1orf65	0.593777	FIS1
ENSG00000203697	1	223711349	223853436	369	39	145933	1.332	0.091431	CAPN8	0.306326	FIS1
ENSG00000162909	1	223889295	223963720	295	21	145914	2.5622	0.0052002	CAPN2	0.0593376	FIS1
ENSG00000143514	1	223967601	224033674	182	26	145942	2.1523	0.015687	TP53BP2	0.115474	FIS1
ENSG00000269358	1	224215760	224216371	1	1	145814	-1.0311	0.84876	AC138393.1	0.907175	FIS1
ENSG00000143756	1	224301789	224349749	227	25	146105	-1.3769	0.91573	FBXO28	0.946329	FIS1
ENSG00000143753	1	224363458	224381143	46	11	145634	-0.31911	0.62518	DEGS1	0.774039	FIS1
ENSG00000143748	1	224415036	224518089	298	34	145821	-1.0636	0.85625	NVL	0.911864	FIS1
ENSG00000143771	1	224544552	224567161	76	14	145689	-0.17334	0.56881	CNIH4	0.739473	FIS1
ENSG00000162923	1	224572845	224624735	123	19	145954	-0.55752	0.71141	WDR26	0.826233	FIS1
ENSG00000143786	1	224622362	224928251	1083	64	145630	1.1876	0.11749	CNIH3	0.348031	FIS1
ENSG00000185842	1	225083964	225586996	1945	49	146089	-0.59532	0.72418	DNAH14	0.834256	FIS1
ENSG00000143815	1	225589204	225616627	87	19	145961	0.19657	0.42208	LBR	0.641798	FIS1
ENSG00000203691	1	225600404	225602040	5	3	146402	0.5505	0.29099	AC092811.1	0.540663	FIS1
ENSG00000154380	1	225674537	225840844	463	27	146107	1.3381	0.09043	ENAH	0.305	FIS1
ENSG00000143742	1	225965531	225978168	40	11	145403	0.68747	0.24589	SRP9	0.498735	FIS1
ENSG00000143819	1	225997794	226033260	152	51	145431	-1.6389	0.94938	EPHX1	0.966411	FIS1
ENSG00000196187	1	226033237	226070069	137	22	145989	-1.9859	0.97648	TMEM63A	0.983884	FIS1
ENSG00000243709	1	226073982	226099082	101	19	145790	-2.0861	0.98152	LEFTY1	0.987728	FIS1
ENSG00000255835	1	226074396	226111978	131	27	145803	-2.8923	0.99809	RP4-559A3.7	0.998681	FIS1
ENSG00000143811	1	226107578	226111978	9	4	145850	-1.9645	0.97526	PYCR2	0.983247	FIS1
ENSG00000143768	1	226124298	226129189	7	4	144641	-2.0563	0.98012	LEFTY2	0.986805	FIS1
ENSG00000143751	1	226170403	226187032	39	14	145637	0.16564	0.43422	SDE2	0.650418	FIS1
ENSG00000163041	1	226249552	226259702	27	15	145765	1.105	0.13458	H3F3A	0.371299	FIS1
ENSG00000182827	1	226332380	226374431	138	26	145923	0.44838	0.32694	ACBD3	0.571653	FIS1
ENSG00000185155	1	226411319	226414755	4	2	146278	-0.51718	0.69748	MIXL1	0.818705	FIS1
ENSG00000183814	1	226418850	226497570	172	34	145690	-1.1918	0.88333	LIN9	0.92658	FIS1
ENSG00000143799	1	226548392	226595780	166	21	146048	3.2724	0.00053328	PARP1	0.0121164	FIS1
ENSG00000203685	1	226736501	226796915	240	46	145409	2.7292	0.0031741	C1orf95	0.0432428	FIS1
ENSG00000143772	1	226819391	226927024	291	43	145351	1.0513	0.14656	ITPKB	0.387004	FIS1
ENSG00000143801	1	227057885	227083806	122	21	146127	-0.15307	0.56083	PSEN2	0.734353	FIS1
ENSG00000163050	1	227085237	227175246	276	56	145307	-1.2374	0.89203	ADCK3	0.932238	FIS1
ENSG00000143776	1	227177566	227506175	1759	27	146257	-0.14037	0.55582	CDC42BPA	0.731876	FIS1
ENSG00000181450	1	227751244	227865144	354	26	146006	1.3087	0.095318	ZNF678	0.312479	FIS1
ENSG00000143740	1	227916240	227968927	182	32	145926	0.61684	0.26867	SNAP47	0.520163	FIS1
ENSG00000081692	1	227918126	227923112	20	9	146128	0.17971	0.42869	JMJD4	0.646387	FIS1
ENSG00000185888	1	228003394	228034171	123	22	145981	0.002613	0.49896	PRSS38	0.694691	FIS1
ENSG00000143816	1	228106357	228135599	125	21	145598	-0.12196	0.54854	WNT9A	0.727179	FIS1
ENSG00000154342	1	228194752	228248961	157	29	145692	0.65678	0.25566	WNT3A	0.507986	FIS1
ENSG00000143761	1	228270361	228286912	39	13	145985	1.0008	0.15847	ARF1	0.401993	FIS1
ENSG00000143793	1	228288427	228293112	8	4	146030	-0.75707	0.7755	C1orf35	0.864794	FIS1
ENSG00000162910	1	228294380	228297013	3	2	145747	0.86667	0.19306	MRPL55	0.444057	FIS1
ENSG00000143774	1	228327663	228336685	21	9	145954	0.8142	0.20776	GUK1	0.459512	FIS1
ENSG00000198835	1	228337553	228347527	20	9	146041	1.4359	0.075517	GJC2	0.275477	FIS1
ENSG00000203684	1	228351787	228353213	2	1	144531	-0.38624	0.65034	IBA57-AS1	0.789364	FIS1
ENSG00000181873	1	228353516	228369958	36	13	145851	0.61061	0.27073	IBA57	0.521948	FIS1
ENSG00000162913	1	228391207	228401365	33	7	145871	0.41942	0.33746	C1orf145	0.580767	FIS1
ENSG00000154358	1	228395831	228566577	649	40	146038	0.58738	0.27847	OBSCN	0.528947	FIS1
ENSG00000154370	1	228581374	228594541	31	9	145962	-0.67626	0.75056	TRIM11	0.850309	FIS1
ENSG00000162931	1	228595641	228604562	18	6	145912	-0.016865	0.50673	TRIM17	0.699442	FIS1
ENSG00000168148	1	228612546	228613026	2	1	144942	-0.66661	0.74749	HIST3H3	0.84817	FIS1
ENSG00000168159	1	228674762	228683467	43	16	146108	-0.34154	0.63365	RNF187	0.779646	FIS1
ENSG00000116574	1	228870824	228882416	62	12	146037	-0.69151	0.75538	RHOU	0.853285	FIS1
ENSG00000177800	1	229385383	229387557	2	1	144878	-0.48909	0.68761	TMEM78	0.812892	FIS1
ENSG00000168118	1	229406822	229441641	102	16	146144	1.0265	0.15232	RAB4A	0.394441	FIS1
ENSG00000213029	1	229440129	229441248	2	1	145790	-0.433	0.66749	SPHAR	0.800615	FIS1
ENSG00000154429	1	229456758	229479041	66	15	145612	1.0437	0.14831	CCSAP	0.388853	FIS1
ENSG00000143632	1	229566992	229569845	6	2	146077	-0.31145	0.62227	ACTA1	0.773275	FIS1
ENSG00000069248	1	229577045	229644103	247	23	146098	-0.23193	0.5917	NUP133	0.753725	FIS1
ENSG00000135776	1	229652329	229694442	123	24	145941	-0.075423	0.53006	ABCB10	0.714692	FIS1
ENSG00000135801	1	229728858	229761794	106	18	145949	0.031493	0.48744	TAF5L	0.686543	FIS1
ENSG00000135763	1	229761981	229795946	99	18	145767	0.0009968	0.4996	URB2	0.695019	FIS1
ENSG00000143641	1	230193536	230417870	1106	94	145716	-0.31912	0.62518	GALNT2	0.774039	FIS1
ENSG00000177614	1	230457392	230561475	481	57	145636	0.44294	0.32891	PGBD5	0.573294	FIS1
ENSG00000135775	1	230778235	230829728	211	39	145458	0.60531	0.27249	COG2	0.523642	FIS1
ENSG00000135744	1	230838269	230850043	69	17	145869	-0.34579	0.63525	AGT	0.780423	FIS1
ENSG00000135773	1	230883130	230937749	303	32	145515	0.68174	0.2477	CAPN9	0.500485	FIS1
ENSG00000119280	1	230972865	231005335	181	33	146077	0.81548	0.2074	C1orf198	0.459226	FIS1
ENSG00000143643	1	231041989	231114621	325	27	145895	0.8048	0.21047	TTC13	0.46132	FIS1
ENSG00000173409	1	231114727	231136341	88	16	146246	1.5709	0.058106	ARV1	0.240077	FIS1
ENSG00000182118	1	231154704	231175992	128	28	145362	1.6441	0.050074	FAM89A	0.221333	FIS1
ENSG00000119283	1	231297858	231357302	235	43	145926	1.4672	0.071163	TRIM67	0.267017	FIS1
ENSG00000143633	1	231359509	231376933	52	14	145158	1.5264	0.063453	C1orf131	0.251787	FIS1
ENSG00000116906	1	231376953	231413719	118	16	146107	-1.0759	0.85902	GNPAT	0.913337	FIS1
ENSG00000116903	1	231468480	231473598	15	7	146065	0.31938	0.37472	EXOC8	0.608932	FIS1
ENSG00000010072	1	231472850	231490769	59	11	146182	-0.44456	0.67168	SPRTN	0.803086	FIS1
ENSG00000135766	1	231499497	231560790	311	11	146180	0.40004	0.34456	EGLN1	0.586856	FIS1
ENSG00000116918	1	231664399	231702270	76	26	145924	-0.51473	0.69663	TSNAX	0.818067	FIS1
ENSG00000270106	1	231664399	231954990	953	104	145566	1.24	0.10749	TSNAX-DISC1	0.331227	FIS1
ENSG00000162946	1	231762561	232177018	1492	181	145491	2.3741	0.0087971	DISC1	0.0811274	FIS1
ENSG00000116991	1	232533711	232697304	641	65	145725	1.5607	0.059292	SIPA1L2	0.242992	FIS1
ENSG00000212916	1	232940643	232946092	15	5	145808	0.89926	0.18426	MAP10	0.434898	FIS1
ENSG00000135778	1	233086351	233119628	96	15	146188	-0.25503	0.60065	NTPCR	0.759748	FIS1
ENSG00000135749	1	233119181	233431459	1412	95	145833	1.7629	0.038958	PCNXL2	0.192206	FIS1
ENSG00000143674	1	233463514	233520894	248	33	145617	0.49366	0.31077	MLK4	0.55778	FIS1
ENSG00000135750	1	233749750	233808258	254	50	145413	0.15909	0.4368	KCNK1	0.652008	FIS1
ENSG00000183780	1	234040679	234460262	1899	154	145355	-0.48095	0.68473	SLC35F3	0.81115	FIS1
ENSG00000168275	1	234509202	234519795	50	7	145873	-1.7502	0.95996	COA6	0.973122	FIS1
ENSG00000059588	1	234527059	234614849	470	61	145941	-0.89174	0.81373	TARBP1	0.887518	FIS1
ENSG00000168264	1	234740015	234745271	13	6	144813	1.4252	0.077046	IRF2BP2	0.27858	FIS1
ENSG00000173726	1	235272651	235292251	61	11	146062	0.31998	0.37449	TOMM20	0.608732	FIS1
ENSG00000188739	1	235294498	235324772	84	16	145776	0.23505	0.40709	RBM34	0.631812	FIS1
ENSG00000054267	1	235294949	235491534	609	30	145865	1.1016	0.13531	ARID4B	0.372214	FIS1
ENSG00000152904	1	235490665	235507847	64	14	145991	0.68175	0.2477	GGPS1	0.500485	FIS1
ENSG00000116957	1	235530675	235612283	290	28	145857	0.86468	0.19361	TBCE	0.444627	FIS1
ENSG00000162885	1	235613238	235667781	177	24	146171	1.7785	0.037663	B3GALNT2	0.189075	FIS1
ENSG00000168243	1	235710987	235814054	417	58	145061	1.8168	0.034627	GNG4	0.180799	FIS1
ENSG00000143669	1	235824341	236046940	450	44	145825	-1.1645	0.87788	LYST	0.92351	FIS1
ENSG00000116962	1	236139130	236228462	338	46	145621	0.37854	0.35251	NID1	0.591934	FIS1
ENSG00000077585	1	236305832	236385165	355	41	145031	1.4661	0.071316	GPR137B	0.267325	FIS1
ENSG00000086619	1	236378855	236445319	396	17	145982	2.7266	0.0031992	ERO1LB	0.0434282	FIS1
ENSG00000186197	1	236511562	236648214	685	82	145701	0.31333	0.37702	EDARADD	0.610573	FIS1
ENSG00000116977	1	236681300	236716281	214	14	145871	0.52387	0.30019	LGALS8	0.548959	FIS1
ENSG00000119285	1	236712305	236767804	385	18	146263	0.61821	0.26822	HEATR1	0.519771	FIS1
ENSG00000077522	1	236849754	236927931	359	45	145698	1.7056	0.044043	ACTN2	0.206203	FIS1
ENSG00000116984	1	236958610	237067281	380	23	145924	1.2411	0.10728	MTR	0.330749	FIS1
ENSG00000244020	1	237167403	237167718	2	1	145889	0.39408	0.34676	MT1HL1	0.588254	FIS1
ENSG00000198626	1	237205505	237997288	3543	275	145448	1.3375	0.090526	RYR2	0.305129	FIS1
ENSG00000116996	1	238045705	238054094	43	12	146172	0.60366	0.27303	ZP4	0.52436	FIS1
ENSG00000270188	1	238107024	238108575	15	4	144908	-0.14165	0.55632	MTRNR2L11	0.732049	FIS1
ENSG00000133019	1	239549865	240078750	2083	137	145749	-0.0089009	0.50355	CHRM3	0.697484	FIS1
ENSG00000155816	1	240177648	240638489	2188	138	145354	0.53974	0.29469	FMN2	0.543159	FIS1
ENSG00000268365	1	240629183	240643504	51	9	143770	0.5174	0.30244	AL646016.1	0.550781	FIS1
ENSG00000180875	1	240652873	240775449	463	96	145084	0.95214	0.17051	GREM2	0.418327	FIS1
ENSG00000182901	1	240931554	241520530	2490	220	145552	0.76184	0.22308	RGS7	0.473951	FIS1
ENSG00000091483	1	241660903	241683061	48	14	145044	-2.0885	0.98162	FH	0.987736	FIS1
ENSG00000117009	1	241695434	241758944	286	58	145508	0.014109	0.49437	KMO	0.691204	FIS1
ENSG00000054277	1	241753404	241840678	330	66	145270	0.61785	0.26834	OPN3	0.519882	FIS1
ENSG00000203668	1	241792155	241799232	24	12	145525	0.2404	0.40501	CHML	0.630936	FIS1
ENSG00000162843	1	241815580	241965435	625	72	145349	1.0145	0.15517	WDR64	0.397788	FIS1
ENSG00000174371	1	242011269	242058450	266	26	145926	-0.20857	0.58261	EXO1	0.74895	FIS1
ENSG00000197769	1	242158792	242162375	18	6	145958	0.41538	0.33893	MAP1LC3C	0.582008	FIS1
ENSG00000180287	1	242246288	242687998	1993	149	145571	-1.249	0.89416	PLD5	0.933277	FIS1
ENSG00000143702	1	243287730	243418650	269	30	145967	0.60937	0.27114	CEP170	0.522129	FIS1
ENSG00000269795	1	243388058	243395911	19	9	146104	-0.30675	0.62048	AC092782.1	0.772626	FIS1
ENSG00000054282	1	243419320	243663394	597	59	145636	1.603	0.054466	SDCCAG8	0.231829	FIS1
ENSG00000117020	1	243651535	244014381	806	44	145987	0.24051	0.40497	AKT3	0.630936	FIS1
ENSG00000179456	1	244214585	244220778	9	6	145871	0.12923	0.44859	ZBTB18	0.659654	FIS1
ENSG00000268146	1	244227632	244231211	7	4	145388	1.4351	0.075626	AL590483.1	0.275806	FIS1
ENSG00000173728	1	244515937	244552965	166	23	145302	0.52598	0.29945	C1orf100	0.548173	FIS1
ENSG00000035687	1	244571796	244615436	146	30	145984	0.88179	0.18895	ADSS	0.439921	FIS1
ENSG00000179397	1	244617679	244804479	686	41	145862	0.39042	0.34811	C1orf101	0.589107	FIS1
ENSG00000121644	1	244816237	244872335	165	28	145550	1.551	0.060448	DESI2	0.245534	FIS1
ENSG00000203667	1	244998624	245008359	34	9	145102	0.93906	0.17385	COX20	0.422734	FIS1
ENSG00000153187	1	245014468	245027844	17	6	145693	-0.078782	0.5314	HNRNPU	0.715756	FIS1
ENSG00000272195	1	245132652	245134390	4	2	145744	-1.9544	0.97468	RP11-156E8.1	0.982794	FIS1
ENSG00000203666	1	245133007	245290466	568	45	145517	0.1347	0.44643	EFCAB2	0.658507	FIS1
ENSG00000162849	1	245318287	245872733	2628	259	145364	-0.22725	0.58988	KIF26B	0.752981	FIS1
ENSG00000185420	1	245912642	246670614	3992	154	145879	2.0318	0.021089	SMYD3	0.136706	FIS1
ENSG00000162851	1	246703862	246729626	172	22	145581	0.78931	0.21496	TFB2M	0.465919	FIS1
ENSG00000162852	1	246729746	246831886	391	48	145817	1.2611	0.10363	CNST	0.32502	FIS1
ENSG00000143653	1	246887349	246931439	162	25	145621	0.70073	0.24174	SCCPDH	0.494445	FIS1
ENSG00000153207	1	247002400	247095280	277	36	145835	1.8456	0.032473	AHCTF1	0.175191	FIS1
ENSG00000197472	1	247108849	247171395	287	38	146052	3.6807	0.0001163	ZNF695	0.00413084	FIS1
ENSG00000135747	1	247108849	247242113	679	39	145938	3.5359	0.00020319	ZNF670	0.00615301	FIS1
ENSG00000188295	1	247263264	247267674	13	4	145565	0.30004	0.38207	ZNF669	0.61365	FIS1
ENSG00000221953	1	247273462	247275719	7	2	144836	1.4392	0.07504	C1orf229	0.274691	FIS1
ENSG00000196418	1	247285277	247335318	179	23	145718	1.722	0.042538	ZNF124	0.201909	FIS1
ENSG00000162714	1	247460714	247495148	122	22	145985	1.1231	0.1307	ZNF496	0.365558	FIS1
ENSG00000162711	1	247579458	247612410	162	42	145756	-0.13816	0.55494	NLRP3	0.731404	FIS1
ENSG00000177535	1	247614255	247615308	6	2	146193	-3.1464	0.99917	OR2B11	0.999223	FIS1
ENSG00000169224	1	247670360	247740992	290	53	145657	-0.51746	0.69758	GCSAML	0.818705	FIS1
ENSG00000196242	1	247693434	247697141	13	5	145643	0.17497	0.43055	OR2C3	0.647435	FIS1
ENSG00000177489	1	247751662	247752615	6	4	146526	0.35608	0.36089	OR2G2	0.597857	FIS1
ENSG00000177476	1	247768856	247769838	5	3	146399	-0.32768	0.62842	OR2G3	0.775967	FIS1
ENSG00000197437	1	247835320	247836365	8	2	146404	0.045921	0.48169	OR13G1	0.682668	FIS1
ENSG00000169214	1	247875045	247876105	7	3	146229	0.13695	0.44553	OR6F1	0.657714	FIS1
ENSG00000241128	1	247886401	247887345	6	3	146297	0.79323	0.21382	OR14A2	0.464975	FIS1
ENSG00000153230	1	247901917	247902861	2	1	145905	-0.14837	0.55897	OR14K1	0.733595	FIS1
ENSG00000221888	1	247920676	247921982	7	3	146314	-0.49917	0.69117	OR1C1	0.814795	FIS1
ENSG00000196772	1	247978102	247979031	4	2	146459	-0.92949	0.82368	OR14A16	0.89295	FIS1
ENSG00000197591	1	248004199	248005254	11	2	146456	-0.0031108	0.50124	OR11L1	0.695689	FIS1
ENSG00000162722	1	248020501	248041507	111	18	145170	-0.106	0.54221	TRIM58	0.723091	FIS1
ENSG00000238243	1	248031277	248060449	149	26	145700	0.35699	0.36055	OR2W3	0.597732	FIS1
ENSG00000177462	1	248084320	248085258	4	2	145978	-1.0144	0.8448	OR2T8	0.904657	FIS1
ENSG00000177275	1	248097071	248098057	1	1	146526	0.96853	0.16639	OR2AJ1	0.413288	FIS1
ENSG00000196071	1	248100493	248264224	562	43	145892	0.79678	0.21279	OR2L13	0.463823	FIS1
ENSG00000196936	1	248112160	248113098	4	2	146311	0.42313	0.3361	OR2L8	0.579466	FIS1
ENSG00000187080	1	248128535	248129641	6	3	146426	0.78394	0.21654	OR2AK2	0.467788	FIS1
ENSG00000197454	1	248185250	248186188	2	1	144022	2.4515	0.0071124	OR2L5	0.0708958	FIS1
ENSG00000203663	1	248201474	248202607	5	3	145929	1.2279	0.10975	OR2L2	0.33476	FIS1
ENSG00000198128	1	248223984	248224922	4	1	146523	-0.50084	0.69176	OR2L3	0.815131	FIS1
ENSG00000162727	1	248308450	248309388	5	3	144506	-0.7187	0.76384	OR2M5	0.858161	FIS1
ENSG00000198601	1	248343288	248344331	4	2	146194	-0.65133	0.74258	OR2M2	0.844899	FIS1
ENSG00000228198	1	248366332	248367392	4	2	146017	-0.35677	0.63937	OR2M3	0.782785	FIS1
ENSG00000171180	1	248402231	248403166	2	1	145634	2.8215	0.0023899	OR2M4	0.0357841	FIS1
ENSG00000177201	1	248457918	248458880	3	2	146270	1.4931	0.067711	OR2T12	0.259403	FIS1
ENSG00000177186	1	248486894	248487899	8	2	146283	2.2311	0.012838	OR2M7	0.102878	FIS1
ENSG00000177174	1	248512077	248513015	6	2	146521	1.1406	0.12702	OR14C36	0.360554	FIS1
ENSG00000196944	1	248524883	248525929	6	3	145998	-0.034561	0.51378	OR2T4	0.704681	FIS1
ENSG00000198104	1	248550910	248551836	7	2	146347	0.92707	0.17695	OR2T6	0.426068	FIS1
ENSG00000175143	1	248569296	248570405	3	2	145886	0.12341	0.45089	OR2T1	0.661184	FIS1
ENSG00000227152	1	248604508	248605434	1	1	143029	2.4079	0.0080224	OR2T7	0.0762551	FIS1
ENSG00000188558	1	248684916	248685964	1	1	146526	-0.67523	0.75023	OR2G6	0.850167	FIS1
ENSG00000184022	1	248756052	248757100	1	1	146006	0.31356	0.37693	OR2T10	0.610532	FIS1
ENSG00000183130	1	248789420	248790491	1	1	145414	1.8009	0.035858	OR2T11	0.184489	FIS1
ENSG00000187701	1	248813232	248814185	2	1	143122	0.29617	0.38355	OR2T27	0.614657	FIS1
ENSG00000189181	1	248844628	248845629	10	3	146193	0.81477	0.2076	OR14I1	0.459345	FIS1
ENSG00000266949	1	248902716	248903150	1	1	146501	0.19186	0.42393	LYPD8	0.64311	FIS1
ENSG00000175137	1	249104648	249120832	37	10	145327	-1.1806	0.88111	SH3BP5L	0.925227	FIS1
ENSG00000171161	1	249132409	249143716	25	11	145859	-0.052145	0.52079	ZNF672	0.708726	FIS1
ENSG00000171163	1	249144205	249153343	20	7	145724	0.47157	0.31862	ZNF692	0.564682	FIS1
ENSG00000185220	1	249200395	249214145	52	14	145392	-1.5485	0.93925	PGBD2	0.960746	FIS1
ENSG00000184731	2	38814	46870	20	9	145989	-0.95397	0.82995	FAM110C	0.896259	FIS1
ENSG00000035115	2	217730	266398	141	22	145864	-1.4297	0.9236	SH3YL1	0.951082	FIS1
[truncated: 73,657 more rows]

## Sheet: Supp. Table 9
Supplementary Table 9. PGI validation in external cohorts
Statistics of PGIs constructed with GWAS summary statistics from the various GWAS, tested in three independent cohorts. In ALSPAC we used full-scale IQ measured at age 8. In MCS we used a cognitive performance measure derived from a factor analysis using a combination of various cognitive tests administered across childhood. In INTERVAL we used the average of the two fluid intelligence tests admi…
GWAS	beta	se	cohort	effect	variance explained	Discovery GWAS N
FIS1	0.218631	0.016103	ALSPAC	population	0.0477995	146625
FIS1	0.092308	0.028587	ALSPAC	direct	0.00852077	146625
Observed FIS	0.257342	0.016242	ALSPAC	population	0.0662249	283587
Observed FIS	0.146503	0.028915	ALSPAC	direct	0.0214631	283587
Combined FIS	0.285767	0.015439	ALSPAC	population	0.0816628	455636
Combined FIS	0.162362	0.028585	ALSPAC	direct	0.0263614	455636
Combined FIS + COGENT	0.290876	0.0154582	ALSPAC	population	0.0846087	490934
Combined FIS + COGENT	0.166703	0.0287149	ALSPAC	direct	0.0277899	490934
FIS1	0.18896	0.01468	MCS	population	0.0357059	146625
FIS1	0.1193	0.02351	MCS	direct	0.0142325	146625
Observed FIS	0.21763	0.01509	MCS	population	0.0473628	283587
Observed FIS	0.15034	0.02385	MCS	direct	0.0226021	283587
Combined FIS	0.23271	0.01411	MCS	population	0.0541539	455636
Combined FIS	0.15514	0.0233	MCS	direct	0.0240684	455636
Combined FIS + COGENT	0.23819	0.01415	MCS	population	0.0567345	490934
Combined FIS + COGENT	0.15927	0.02333	MCS	direct	0.0253669	490934
FIS1	0.20018	0.00672983	INTERVAL	population	0.040072	146625
Observed FIS	0.224672	0.0067517	INTERVAL	population	0.0504775	283587
Combined FIS	0.23328	0.006644	INTERVAL	population	0.0544196	455636
Combined FIS + COGENT	0.23717	0.0066667	INTERVAL	population	0.0562496	490934

## Sheet: Supp. Table 10
Supplementary Table 10. Gene-level tissue enrichement FUMA
Results from MAGMA gene-level tissue enrichment implemented in FUMA SNP2GENE. Per Intelligence measure -log10(P) values are shown for each GTEx v8 Tissue.
GTEx v8 Tissue	Measured FIS1	Observed FIS	Combined FIS	Combined FIS + COGENT
Brain Cerebellar Hemisphere	10.0717	14.2161	19.0246	22.541
Brain Cerebellum	10.2474	14.6037	18.6952	21.9139
Brain Frontal Cortex BA9	13.7747	15.1337	17.7743	20.7432
Brain Cortex	14.0247	15.816	17.4671	20.2262
Brain Anterior cingulate cortex BA24	11.5151	12.5983	14.425	16.9668
Brain Hippocampus	9.11549	10.537	12.5244	14.1666
Brain Nucleus accumbens basal ganglia	9.7681	11.6751	12.1853	14.0939
Brain Hypothalamus	8.55461	10.5541	11.9506	14.0775
Brain Amygdala	8.66069	10.0098	11.6721	13.4771
Brain Caudate basal ganglia	8.7868	10.4424	11.1642	12.8927
Brain Putamen basal ganglia	8.46126	9.81899	10.2732	12.0603
Brain Substantia nigra	4.54642	5.50931	5.48976	6.77919
Brain Spinal cord cervical c-1	2.75998	4.84649	5.37755	6.66063
Pituitary	2.94439	5.22579	4.31521	4.62424
Testis	0.72462	1.1821	1.47575	1.56346
Ovary	0.306915	0.463997	0.543224	0.570894
Cells EBV-transformed lymphocytes	0.260847	0.163689	0.266626	0.208064
Cells Cultured fibroblasts	0.12249	0.054241	0.232481	0.153106
Uterus	0.132798	0.250542	0.154536	0.126441
Nerve Tibial	0.118724	0.045632	0.0385457	0.032747
Muscle Skeletal	0.138729	0.0585432	0.0340931	0.0189202
Whole Blood	0.00340953	0.0408107	0.012164	0.00658582
Cervix Endocervix	0.0152027	0.0268583	0.0135149	0.00596015
Cervix Ectocervix	0.00635659	0.0107505	0.00543651	0.00470272
Adrenal Gland	0.0706628	0.013094	0.00555966	0.00381242
Pancreas	0.000908625	0.00329136	0.00197619	0.000817242
Colon Sigmoid	0.0381519	0.0558432	0.00103921	0.000725878
Fallopian Tube	0.00171014	0.0019631	0.00295454	0.00056495
Artery Aorta	0.0684252	0.00735371	0.00156192	0.000543208
Artery Tibial	0.0718193	0.0119407	0.00256556	0.000464944
Liver	0.000404082	0.000112931	0.000338882	8.68676e-05
Skin Not Sun Exposed Suprapubic	3.04017e-05	2.17153e-05	4.7775e-05	5.6462e-05
Esophagus Gastroesophageal Junction	0.00508923	0.00487837	6.94927e-05	3.04017e-05
Thyroid	8.68598e-06	0	9.55553e-05	2.60585e-05
Skin Sun Exposed Lower leg	2.17153e-05	8.68598e-06	2.17153e-05	1.73721e-05
Esophagus Muscularis	0.00165782	0.00155321	1.3029e-05	8.68598e-06
Artery Coronary	0.00873847	0.000108587	3.90883e-05	4.34297e-06
Small Intestine Terminal Ileum	1.73721e-05	0.000208511	2.17153e-05	4.34297e-06
Spleen	0.00075198	0.000125964	8.68598e-06	4.34297e-06
Adipose Subcutaneous	3.04017e-05	0	4.34297e-06	0
Adipose Visceral Omentum	0	0	0	0
Bladder	0.000260655	5.21185e-05	0	0
Breast Mammary Tissue	0	0	0	0
Colon Transverse	1.73721e-05	0.000769382	4.34297e-06	0
Esophagus Mucosa	0	0	0	0
Heart Atrial Appendage	0.00157064	0	0	0
Heart Left Ventricle	0.000734579	0	0	0
Kidney Cortex	0.00591172	2.17153e-05	4.34297e-06	0
Kidney Medulla	0.00138326	8.68598e-06	0	0
Lung	0	0	0	0
Minor Salivary Gland	0	0	0	0
Prostate	0.00176682	0.000351921	0	0
Stomach	2.60585e-05	8.68598e-06	4.34297e-06	0
Vagina	4.34297e-06	0	0	0

[truncated: 4 more sheets: Supp. Table 11, Supp. Table 12, Supp. Table 13, Supp. Table 14]
